# Supplementary material for: Core electron excitations in U4+: modelling of the nd105f2→ nd95f3transitions with n = 3, 4 and 5 by ligand field tools and density functional theory
Source: Royal Society of Chemistry journal article supplement (doi:10.1039/c6cp01395c), 2016-01-01
Supplement: c6cp01395c1.pdf [file c6cp01395c1.pdf]

**Core electron excitations in  $U^{4+}$ : modelling of the  $nd^{10}5f^2 \rightarrow nd^95f^3$  transitions with  $n = 3, 4$  and  $5$  by ligand field tools and density functional theory**

**Harry Ramanantoanina,<sup>\*a</sup> Goutam Kuri,<sup>\*a</sup> Claude Daul<sup>b</sup> and Johannes Bertsch<sup>a</sup>**

<sup>a</sup> Paul Scherrer Institute, CH-5232 Villigen PSI, Switzerland.

<sup>b</sup> Department of chemistry of the University of Fribourg, Chemin du musée 9, CH-1700 Fribourg, Switzerland.

E-mail: [harry.ra@hotmail.com](mailto:harry.ra@hotmail.com); [goutam.kuri@psi.ch](mailto:goutam.kuri@psi.ch)

---

**Electronic supplementary information (ESI): 63 pages**

---

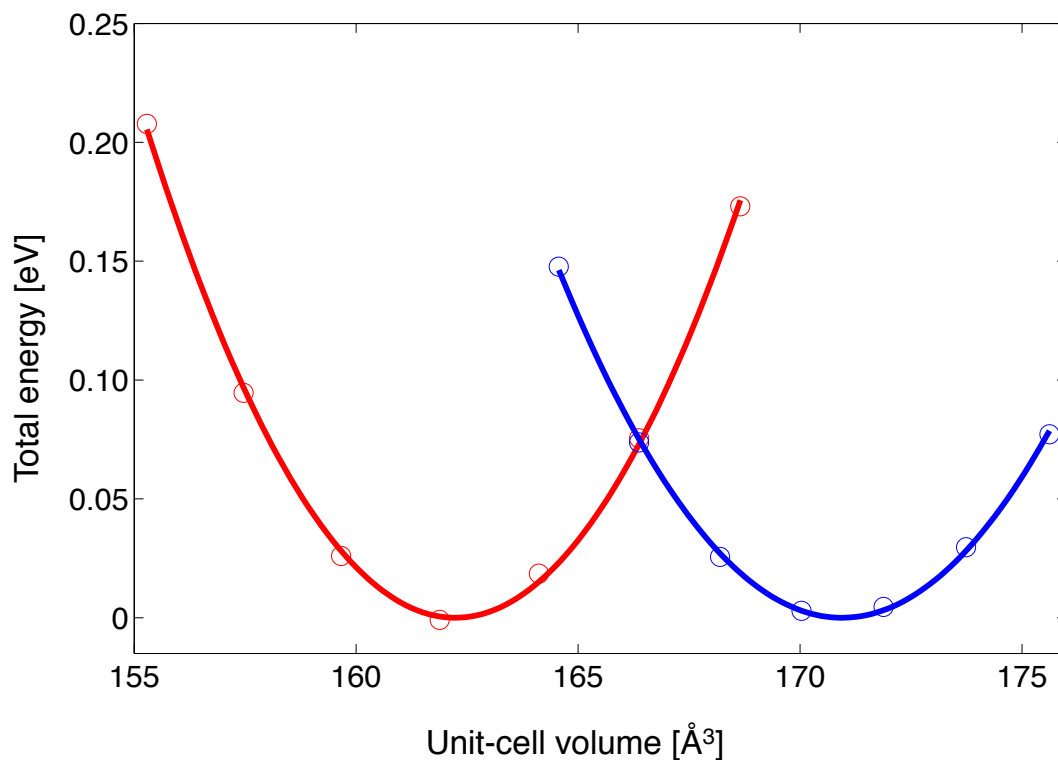

**Figure S1** Calculated total electronic energy with respect to the unit-cell volume of  $\text{UO}_2$  obtained at the LDA+ $U$  (in red colour) and the GGA+ $U$  levels of theory (in blue colour). The solid lines represent the fitting of the DFT results using the Birch-Murnaghan equation of state.

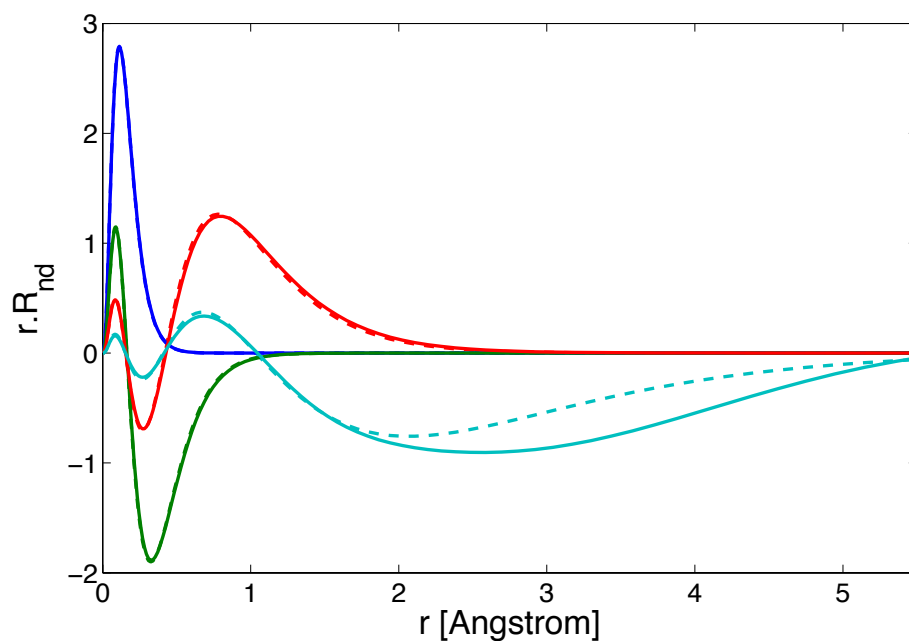

**Figure S2** Graphical representation of the change of the radial functions corresponding to the  $3d_{xy}$  (in blue),  $4d_{xy}$  (in green),  $5d_{xy}$  (in red) and  $6d_{xy}$  (in turquoise) Kohn-Sham orbitals of  $\text{U}^{4+}$  from the free ion (dashed lines) to the molecular cluster  $(\text{UO}_8)^{12-}$  embedded in  $\text{UO}_2$  (solid lines).

**Table S1** Numerical values for the multiplet energy levels (in eV) together with their degeneracy calculated for the ground  $5f^2$  configuration of  $U^{4+}$  in  $UO_2$  represented graphically in the right hand side of Figure 4.

| #  | Multiplicity | Energy levels [eV] |
|----|--------------|--------------------|
| 1  | 3            | 0.0000             |
| 2  | 2            | 0.1805             |
| 3  | 3            | 0.2714             |
| 4  | 1            | 0.3195             |
| 5  | 3            | 0.6434             |
| 6  | 2            | 0.7484             |
| 7  | 3            | 0.7640             |
| 8  | 2            | 0.8518             |
| 9  | 3            | 0.9375             |
| 10 | 3            | 0.9979             |
| 11 | 3            | 1.1083             |
| 12 | 1            | 1.1708             |
| 13 | 3            | 1.2112             |
| 14 | 1            | 1.2153             |
| 15 | 3            | 1.2979             |
| 16 | 2            | 1.3080             |
| 17 | 3            | 1.5243             |
| 18 | 3            | 1.5330             |
| 19 | 1            | 1.5579             |
| 20 | 3            | 1.6116             |
| 21 | 2            | 1.6718             |
| 22 | 3            | 1.7143             |
| 23 | 1            | 2.0288             |
| 24 | 3            | 2.0789             |
| 25 | 2            | 2.1010             |
| 26 | 1            | 2.1403             |
| 27 | 3            | 2.1851             |
| 28 | 3            | 2.3437             |
| 29 | 2            | 2.3448             |
| 30 | 2            | 2.5572             |
| 31 | 3            | 2.5748             |
| 32 | 1            | 2.6165             |
| 33 | 1            | 2.6390             |
| 34 | 3            | 2.8978             |
| 35 | 3            | 3.0188             |
| 36 | 3            | 3.2063             |
| 37 | 2            | 3.2782             |
| 38 | 1            | 3.4251             |
| 39 | 3            | 3.5553             |
| 40 | 1            | 5.5041             |

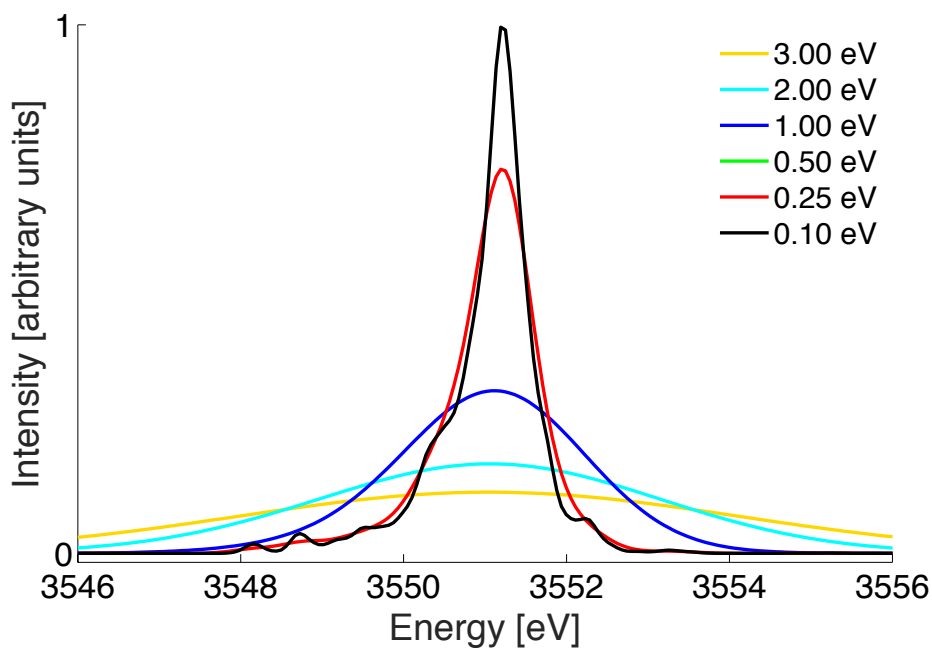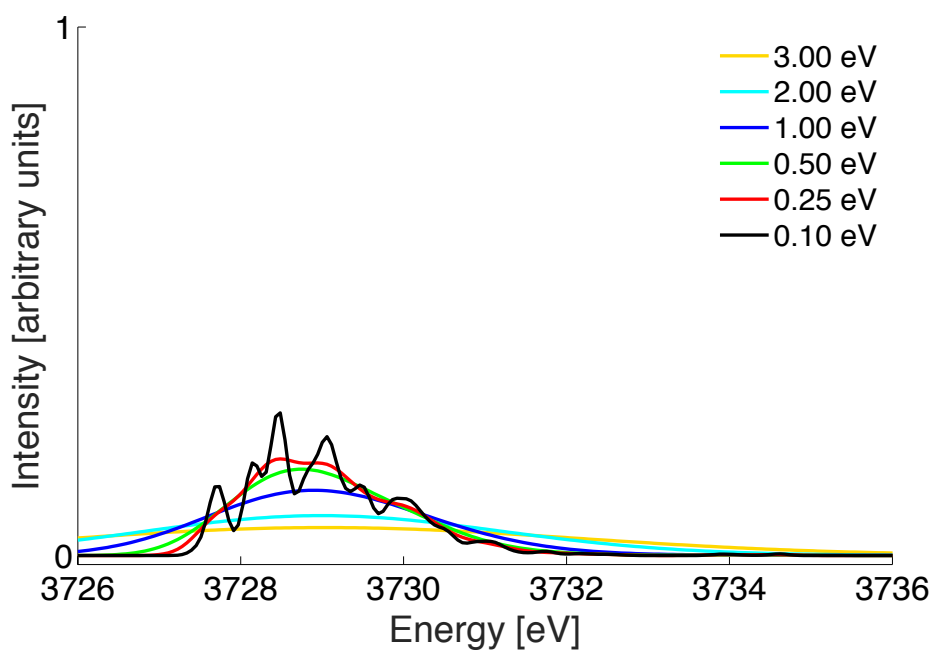

**Figure S3** Graphical representation showing the effect of Gaussian broadening of the oscillator strengths of the dipole allowed  $3d^{10}5f^2 \rightarrow 3d^95f^3$  transitions obtained from the LFDFT calculations of  $U^{4+}$  in  $UO_2$ . The energy values of the Gaussian half width parameter are given in the legend. The X-ray absorption profiles of  $UO_2$  at the uranium  $M_5$  and  $M_4$  edges are seen in the upper-panel and lower-panel of the figure, respectively.

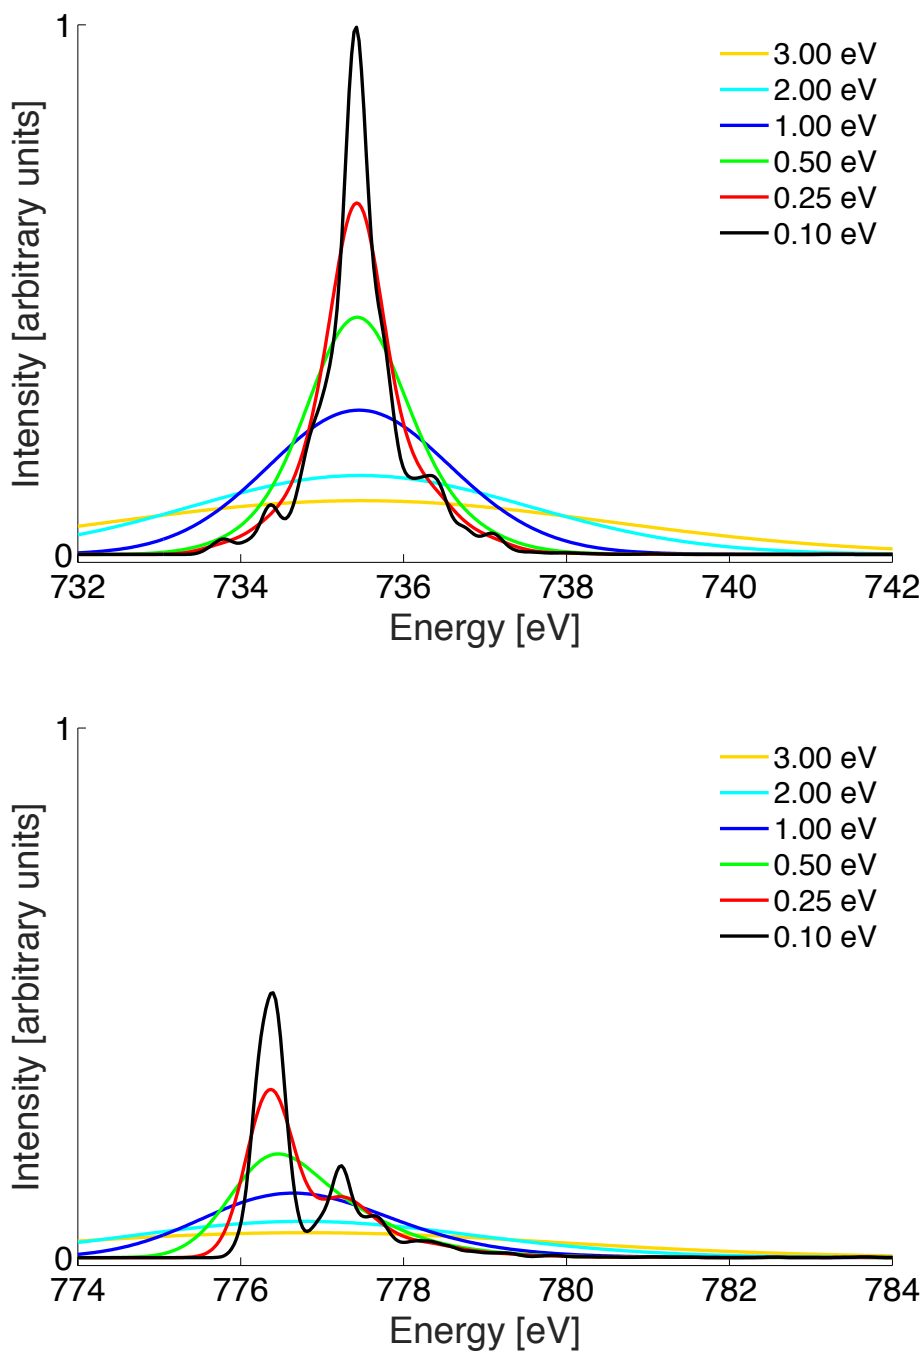

**Figure S4** Graphical representation showing the effect of Gaussian broadening of the oscillator strengths of the dipole allowed  $4d^{10}5f^2 \rightarrow 4d^95f^3$  transitions obtained from the LFDFT calculations of  $U^{4+}$  in  $UO_2$ . The energy values of the Gaussian half width parameter are given in the legend. The X-ray absorption profiles of  $UO_2$  at the uranium  $N_5$  and  $N_4$  edges are seen in the upper-panel and lower-panel of the figure, respectively.

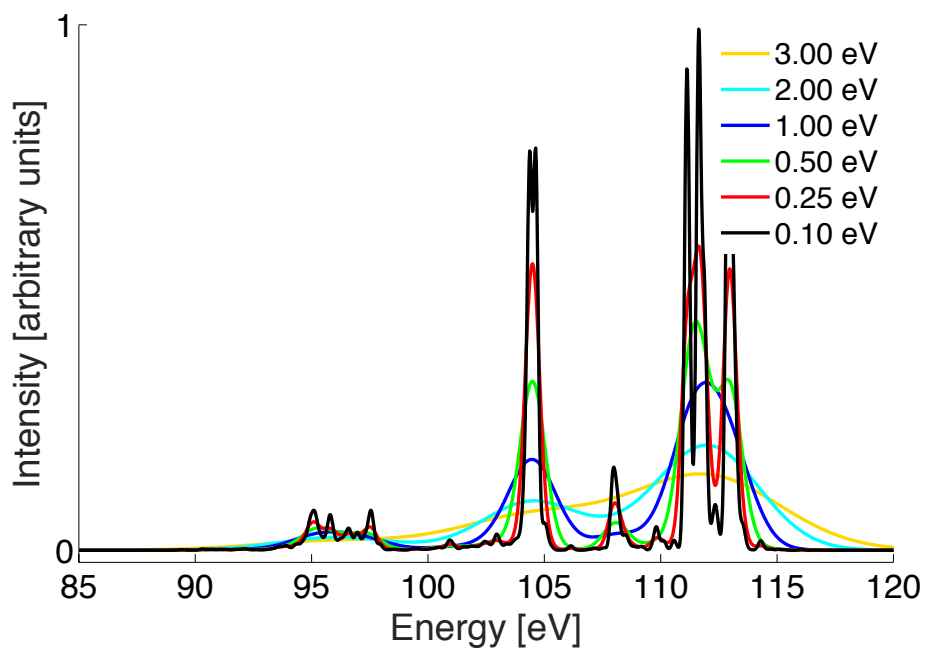

**Figure S5** Graphical representation showing the effect of Gaussian broadening of the oscillator strengths of the dipole allowed  $5d^{10}5f^2 \rightarrow 5d^95f^3$  transitions obtained from the LFDFT calculations of  $U^{4+}$  in  $UO_2$ . The figure represent the X-ray absorption profile of  $UO_2$  at the uranium  $O_{4,5}$  edge. The energy values of the Gaussian half width parameter are given in the legend.

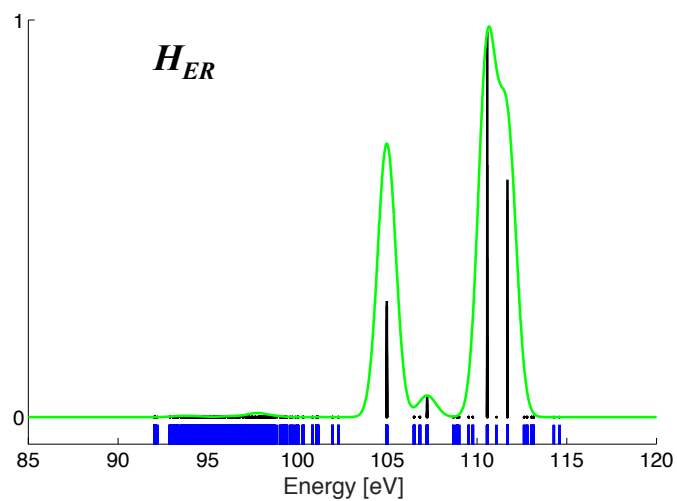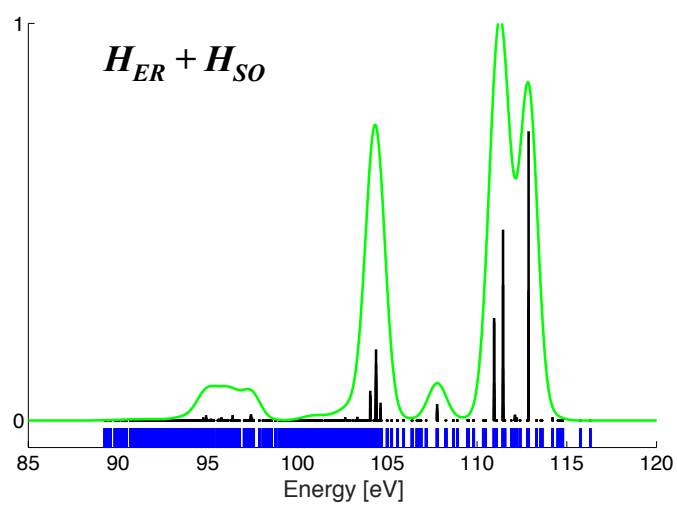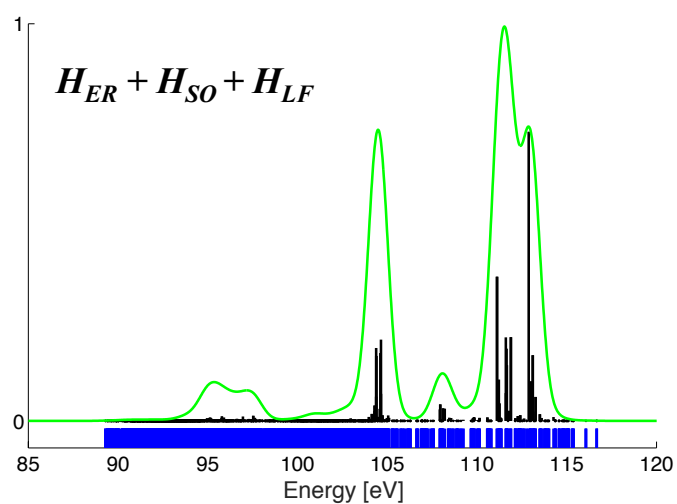

**Figure S6** Calculated multiplet energy levels (in blue colour) of the  $5d^9 5f^2$  electron configuration of  $U^{4+}$  in  $UO_2$ ; together with the intensities of the absorption  $5d^{10} 5f^2 \rightarrow 5d^9 5f^3$  transitions, taking successively the effect of the inter-electron repulsion (top), the inter-electron repulsion plus the spin-orbit coupling (middle) and the inter-electron repulsion plus the spin-orbit coupling plus the ligand field interaction (bottom) into account.

**Table S2** Numerical values for the multiplet energy levels, degeneracies and oscillator strengths calculated for the  $3d^{10}5f^2 \rightarrow 3d^9 5f^3$  transitions of  $U^{4+}$  in  $UO_2$  represented graphically in the upper panel of Figure 5.

| #  | Multiplicity | Energy levels [eV] | Oscillator strength [-] |
|----|--------------|--------------------|-------------------------|
| 1  | 3            | 3547.9643          | 0.0000                  |
| 2  | 2            | 3547.9778          | 0.0000                  |
| 3  | 1            | 3547.9794          | 0.0001                  |
| 4  | 3            | 3547.9927          | 0.0000                  |
| 5  | 3            | 3548.0110          | 0.0001                  |
| 6  | 1            | 3548.0598          | 0.0000                  |
| 7  | 3            | 3548.0780          | 0.0000                  |
| 8  | 2            | 3548.1081          | 0.0000                  |
| 9  | 3            | 3548.1248          | 0.0011                  |
| 10 | 3            | 3548.1325          | 0.0005                  |
| 11 | 3            | 3548.1590          | 0.0004                  |
| 12 | 2            | 3548.1661          | 0.0001                  |
| 13 | 3            | 3548.1711          | 0.0000                  |
| 14 | 3            | 3548.1788          | 0.0004                  |
| 15 | 3            | 3548.1925          | 0.0000                  |
| 16 | 1            | 3548.1932          | 0.0000                  |
| 17 | 3            | 3548.2060          | 0.0000                  |
| 18 | 2            | 3548.2111          | 0.0009                  |
| 19 | 3            | 3548.2145          | 0.0001                  |
| 20 | 1            | 3548.2261          | 0.0000                  |
| 21 | 2            | 3548.3063          | 0.0000                  |
| 22 | 3            | 3548.3140          | 0.0000                  |
| 23 | 3            | 3548.3665          | 0.0000                  |
| 24 | 3            | 3548.3866          | 0.0002                  |
| 25 | 1            | 3548.4073          | 0.0002                  |
| 26 | 3            | 3548.6010          | 0.0000                  |
| 27 | 2            | 3548.6091          | 0.0000                  |
| 28 | 3            | 3548.6169          | 0.0000                  |
| 29 | 3            | 3548.6382          | 0.0000                  |
| 30 | 3            | 3548.6486          | 0.0003                  |
| 31 | 2            | 3548.6588          | 0.0004                  |
| 32 | 3            | 3548.6640          | 0.0009                  |
| 33 | 3            | 3548.6697          | 0.0004                  |
| 34 | 3            | 3548.6781          | 0.0001                  |
| 35 | 2            | 3548.6834          | 0.0000                  |
| 36 | 1            | 3548.6842          | 0.0004                  |
| 37 | 3            | 3548.6880          | 0.0000                  |
| 38 | 1            | 3548.6887          | 0.0000                  |
| 39 | 3            | 3548.6928          | 0.0000                  |
| 40 | 3            | 3548.7014          | 0.0001                  |
| 41 | 2            | 3548.7132          | 0.0004                  |
| 42 | 3            | 3548.7138          | 0.0005                  |
| 43 | 1            | 3548.7246          | 0.0000                  |
| 44 | 1            | 3548.7348          | 0.0009                  |
| 45 | 3            | 3548.7359          | 0.0026                  |
| 46 | 1            | 3548.7894          | 0.0000                  |
| 47 | 3            | 3548.8069          | 0.0001                  |
| 48 | 2            | 3548.8122          | 0.0000                  |
| 49 | 3            | 3548.8389          | 0.0001                  |
| 50 | 3            | 3548.8465          | 0.0001                  |
| 51 | 3            | 3548.8571          | 0.0000                  |
| 52 | 1            | 3548.8616          | 0.0000                  |
| 53 | 2            | 3548.8728          | 0.0006                  |
| 54 | 3            | 3548.8866          | 0.0008                  |
| 55 | 3            | 3548.9274          | 0.0005                  |
| 56 | 1            | 3548.9625          | 0.0000                  |
| 57 | 1            | 3548.9648          | 0.0000                  |
| 58 | 3            | 3548.9687          | 0.0000                  |
| 59 | 3            | 3548.9702          | 0.0002                  |
| 60 | 2            | 3549.0107          | 0.0000                  |
| 61 | 3            | 3549.0143          | 0.0001                  |
| 62 | 3            | 3549.0266          | 0.0000                  |
| 63 | 2            | 3549.0383          | 0.0002                  |
| 64 | 3            | 3549.0595          | 0.0000                  |
| 65 | 1            | 3549.0719          | 0.0000                  |
| 66 | 3            | 3549.0721          | 0.0003                  |
| 67 | 3            | 3549.0743          | 0.0000                  |
| 68 | 3            | 3549.0802          | 0.0001                  |
| 69 | 2            | 3549.0865          | 0.0001                  |
| 70 | 3            | 3549.1079          | 0.0000                  |
| 71 | 1            | 3549.1094          | 0.0001                  |
| 72 | 3            | 3549.1118          | 0.0001                  |
| 73 | 4            | 3549.1197          | 0.0001                  |
| 74 | 2            | 3549.1402          | 0.0001                  |
| 75 | 3            | 3549.1471          | 0.0010                  |
| 76 | 3            | 3549.1547          | 0.0001                  |
| 77 | 3            | 3549.1575          | 0.0004                  |
| 78 | 3            | 3549.1664          | 0.0002                  |
| 79 | 1            | 3549.1737          | 0.0000                  |
| 80 | 2            | 3549.1742          | 0.0003                  |
| 81 | 2            | 3549.1875          | 0.0001                  |



|     |   |           |        |
|-----|---|-----------|--------|
| 82  | 3 | 3549.1899 | 0.0001 |
| 83  | 1 | 3549.2056 | 0.0000 |
| 84  | 3 | 3549.2198 | 0.0001 |
| 85  | 3 | 3549.2245 | 0.0001 |
| 86  | 3 | 3549.2247 | 0.0001 |
| 87  | 3 | 3549.2274 | 0.0000 |
| 88  | 2 | 3549.2284 | 0.0003 |
| 89  | 3 | 3549.2310 | 0.0000 |
| 90  | 3 | 3549.2327 | 0.0000 |
| 91  | 2 | 3549.2473 | 0.0002 |
| 92  | 3 | 3549.2483 | 0.0001 |
| 93  | 3 | 3549.2616 | 0.0004 |
| 94  | 1 | 3549.2621 | 0.0000 |
| 95  | 3 | 3549.2641 | 0.0001 |
| 96  | 1 | 3549.2756 | 0.0000 |
| 97  | 3 | 3549.2767 | 0.0001 |
| 98  | 3 | 3549.2788 | 0.0006 |
| 99  | 3 | 3549.2839 | 0.0002 |
| 100 | 1 | 3549.2885 | 0.0000 |
| 101 | 3 | 3549.3018 | 0.0000 |
| 102 | 2 | 3549.3083 | 0.0000 |
| 103 | 3 | 3549.3133 | 0.0000 |
| 104 | 2 | 3549.3222 | 0.0000 |
| 105 | 1 | 3549.3258 | 0.0001 |
| 106 | 5 | 3549.3263 | 0.0001 |
| 107 | 3 | 3549.3413 | 0.0000 |
| 108 | 1 | 3549.3490 | 0.0001 |
| 109 | 3 | 3549.3629 | 0.0003 |
| 110 | 3 | 3549.3803 | 0.0001 |
| 111 | 3 | 3549.3895 | 0.0000 |
| 112 | 3 | 3549.3910 | 0.0000 |
| 113 | 1 | 3549.3946 | 0.0000 |
| 114 | 3 | 3549.3990 | 0.0004 |
| 115 | 3 | 3549.4193 | 0.0000 |
| 116 | 2 | 3549.4195 | 0.0002 |
| 117 | 1 | 3549.4199 | 0.0000 |
| 118 | 3 | 3549.4250 | 0.0002 |
| 119 | 3 | 3549.4389 | 0.0003 |
| 120 | 2 | 3549.4392 | 0.0004 |
| 121 | 3 | 3549.4485 | 0.0000 |
| 122 | 3 | 3549.4494 | 0.0001 |
| 123 | 3 | 3549.4657 | 0.0019 |
| 124 | 1 | 3549.4660 | 0.0000 |
| 125 | 2 | 3549.4691 | 0.0000 |
| 126 | 3 | 3549.4740 | 0.0003 |
| 127 | 3 | 3549.4777 | 0.0003 |
| 128 | 2 | 3549.4806 | 0.0000 |
| 129 | 3 | 3549.4980 | 0.0007 |
| 130 | 3 | 3549.4984 | 0.0003 |
| 131 | 2 | 3549.5023 | 0.0002 |
| 132 | 3 | 3549.5121 | 0.0005 |
| 133 | 2 | 3549.5210 | 0.0007 |
| 134 | 1 | 3549.5227 | 0.0000 |
| 135 | 1 | 3549.5323 | 0.0000 |
| 136 | 3 | 3549.5454 | 0.0000 |
| 137 | 3 | 3549.5464 | 0.0000 |
| 138 | 5 | 3549.5487 | 0.0006 |
| 139 | 1 | 3549.5510 | 0.0000 |
| 140 | 3 | 3549.5549 | 0.0000 |
| 141 | 3 | 3549.5619 | 0.0004 |
| 142 | 3 | 3549.5624 | 0.0003 |
| 143 | 3 | 3549.5666 | 0.0000 |
| 144 | 5 | 3549.5678 | 0.0002 |
| 145 | 2 | 3549.5783 | 0.0001 |
| 146 | 1 | 3549.5954 | 0.0000 |
| 147 | 3 | 3549.5998 | 0.0003 |
| 148 | 3 | 3549.6006 | 0.0000 |
| 149 | 3 | 3549.6037 | 0.0001 |
| 150 | 3 | 3549.6068 | 0.0000 |
| 151 | 3 | 3549.6130 | 0.0001 |
| 152 | 1 | 3549.6196 | 0.0001 |
| 153 | 3 | 3549.6246 | 0.0004 |
| 154 | 3 | 3549.6248 | 0.0000 |
| 155 | 3 | 3549.6261 | 0.0000 |
| 156 | 2 | 3549.6295 | 0.0009 |
| 157 | 1 | 3549.6300 | 0.0000 |
| 158 | 2 | 3549.6403 | 0.0002 |
| 159 | 3 | 3549.6422 | 0.0000 |
| 160 | 1 | 3549.6501 | 0.0000 |
| 161 | 1 | 3549.6628 | 0.0003 |
| 162 | 3 | 3549.6638 | 0.0004 |
| 163 | 2 | 3549.6677 | 0.0000 |
| 164 | 1 | 3549.6684 | 0.0000 |
| 165 | 3 | 3549.6768 | 0.0000 |
| 166 | 3 | 3549.6785 | 0.0001 |
| 167 | 3 | 3549.6802 | 0.0002 |
| 168 | 3 | 3549.6895 | 0.0003 |

|     |   |           |        |
|-----|---|-----------|--------|
| 169 | 1 | 3549.6905 | 0.0000 |
| 170 | 3 | 3549.7002 | 0.0000 |
| 171 | 2 | 3549.7082 | 0.0000 |
| 172 | 3 | 3549.7155 | 0.0000 |
| 173 | 3 | 3549.7282 | 0.0003 |
| 174 | 2 | 3549.7319 | 0.0002 |
| 175 | 3 | 3549.7336 | 0.0000 |
| 176 | 3 | 3549.7344 | 0.0020 |
| 177 | 1 | 3549.7523 | 0.0001 |
| 178 | 2 | 3549.7554 | 0.0002 |
| 179 | 3 | 3549.7666 | 0.0014 |
| 180 | 2 | 3549.7681 | 0.0000 |
| 181 | 3 | 3549.7764 | 0.0007 |
| 182 | 1 | 3549.7791 | 0.0000 |
| 183 | 3 | 3549.7923 | 0.0003 |
| 184 | 3 | 3549.8058 | 0.0000 |
| 185 | 3 | 3549.8090 | 0.0001 |
| 186 | 1 | 3549.8139 | 0.0000 |
| 187 | 3 | 3549.8212 | 0.0002 |
| 188 | 3 | 3549.8257 | 0.0001 |
| 189 | 3 | 3549.8268 | 0.0003 |
| 190 | 2 | 3549.8323 | 0.0001 |
| 191 | 3 | 3549.8471 | 0.0000 |
| 192 | 3 | 3549.8497 | 0.0000 |
| 193 | 1 | 3549.8509 | 0.0002 |
| 194 | 2 | 3549.8538 | 0.0002 |
| 195 | 3 | 3549.8569 | 0.0002 |
| 196 | 3 | 3549.8618 | 0.0000 |
| 197 | 2 | 3549.8671 | 0.0000 |
| 198 | 1 | 3549.8673 | 0.0000 |
| 199 | 3 | 3549.8675 | 0.0002 |
| 200 | 3 | 3549.8715 | 0.0000 |
| 201 | 2 | 3549.8763 | 0.0004 |
| 202 | 3 | 3549.8833 | 0.0000 |
| 203 | 1 | 3549.8967 | 0.0000 |
| 204 | 3 | 3549.8971 | 0.0002 |
| 205 | 3 | 3549.9043 | 0.0007 |
| 206 | 1 | 3549.9074 | 0.0000 |
| 207 | 3 | 3549.9128 | 0.0001 |
| 208 | 3 | 3549.9151 | 0.0000 |
| 209 | 2 | 3549.9181 | 0.0000 |
| 210 | 1 | 3549.9202 | 0.0000 |
| 211 | 3 | 3549.9236 | 0.0001 |
| 212 | 3 | 3549.9279 | 0.0002 |
| 213 | 3 | 3549.9372 | 0.0003 |
| 214 | 1 | 3549.9441 | 0.0000 |
| 215 | 3 | 3549.9543 | 0.0004 |
| 216 | 3 | 3549.9581 | 0.0026 |
| 217 | 2 | 3549.9782 | 0.0020 |
| 218 | 1 | 3549.9787 | 0.0000 |
| 219 | 3 | 3549.9883 | 0.0002 |
| 220 | 3 | 3549.9884 | 0.0009 |
| 221 | 3 | 3550.0024 | 0.0002 |
| 222 | 1 | 3550.0076 | 0.0000 |
| 223 | 3 | 3550.0098 | 0.0000 |
| 224 | 2 | 3550.0119 | 0.0000 |
| 225 | 3 | 3550.0169 | 0.0000 |
| 226 | 3 | 3550.0188 | 0.0004 |
| 227 | 3 | 3550.0242 | 0.0000 |
| 228 | 2 | 3550.0338 | 0.0000 |
| 229 | 2 | 3550.0428 | 0.0001 |
| 230 | 1 | 3550.0437 | 0.0000 |
| 231 | 3 | 3550.0485 | 0.0001 |
| 232 | 3 | 3550.0501 | 0.0000 |
| 233 | 1 | 3550.0539 | 0.0000 |
| 234 | 3 | 3550.0548 | 0.0001 |
| 235 | 3 | 3550.0618 | 0.0002 |
| 236 | 2 | 3550.0643 | 0.0008 |
| 237 | 3 | 3550.0753 | 0.0000 |
| 238 | 3 | 3550.0767 | 0.0006 |
| 239 | 2 | 3550.0836 | 0.0001 |
| 240 | 3 | 3550.0894 | 0.0018 |
| 241 | 3 | 3550.0980 | 0.0014 |
| 242 | 2 | 3550.1022 | 0.0001 |
| 243 | 3 | 3550.1026 | 0.0003 |
| 244 | 1 | 3550.1053 | 0.0000 |
| 245 | 3 | 3550.1065 | 0.0004 |
| 246 | 3 | 3550.1142 | 0.0006 |
| 247 | 2 | 3550.1162 | 0.0006 |
| 248 | 3 | 3550.1192 | 0.0000 |
| 249 | 3 | 3550.1248 | 0.0000 |
| 250 | 1 | 3550.1298 | 0.0000 |
| 251 | 2 | 3550.1303 | 0.0000 |
| 252 | 1 | 3550.1311 | 0.0000 |
| 253 | 3 | 3550.1337 | 0.0003 |
| 254 | 3 | 3550.1413 | 0.0004 |
| 255 | 3 | 3550.1475 | 0.0000 |

|     |   |           |        |
|-----|---|-----------|--------|
| 256 | 3 | 3550.1486 | 0.0001 |
| 257 | 3 | 3550.1488 | 0.0003 |
| 258 | 3 | 3550.1515 | 0.0000 |
| 259 | 2 | 3550.1621 | 0.0004 |
| 260 | 1 | 3550.1685 | 0.0000 |
| 261 | 3 | 3550.1779 | 0.0001 |
| 262 | 3 | 3550.1781 | 0.0000 |
| 263 | 2 | 3550.1822 | 0.0001 |
| 264 | 3 | 3550.1832 | 0.0008 |
| 265 | 1 | 3550.1852 | 0.0007 |
| 266 | 3 | 3550.1857 | 0.0001 |
| 267 | 2 | 3550.1913 | 0.0000 |
| 268 | 3 | 3550.1971 | 0.0015 |
| 269 | 1 | 3550.2027 | 0.0000 |
| 270 | 3 | 3550.2052 | 0.0000 |
| 271 | 2 | 3550.2100 | 0.0000 |
| 272 | 3 | 3550.2104 | 0.0001 |
| 273 | 1 | 3550.2129 | 0.0015 |
| 274 | 3 | 3550.2174 | 0.0012 |
| 275 | 2 | 3550.2203 | 0.0000 |
| 276 | 3 | 3550.2246 | 0.0000 |
| 277 | 3 | 3550.2270 | 0.0000 |
| 278 | 3 | 3550.2327 | 0.0009 |
| 279 | 3 | 3550.2338 | 0.0000 |
| 280 | 1 | 3550.2441 | 0.0023 |
| 281 | 3 | 3550.2444 | 0.0000 |
| 282 | 2 | 3550.2458 | 0.0001 |
| 283 | 3 | 3550.2506 | 0.0001 |
| 284 | 3 | 3550.2617 | 0.0000 |
| 285 | 2 | 3550.2618 | 0.0006 |
| 286 | 1 | 3550.2624 | 0.0000 |
| 287 | 3 | 3550.2720 | 0.0040 |
| 288 | 1 | 3550.2798 | 0.0002 |
| 289 | 3 | 3550.2829 | 0.0016 |
| 290 | 2 | 3550.2841 | 0.0003 |
| 291 | 1 | 3550.2877 | 0.0000 |
| 292 | 3 | 3550.2912 | 0.0001 |
| 293 | 3 | 3550.2928 | 0.0005 |
| 294 | 1 | 3550.2939 | 0.0000 |
| 295 | 2 | 3550.2969 | 0.0013 |
| 296 | 3 | 3550.3017 | 0.0015 |
| 297 | 3 | 3550.3056 | 0.0001 |
| 298 | 3 | 3550.3158 | 0.0002 |
| 299 | 2 | 3550.3160 | 0.0006 |
| 300 | 1 | 3550.3183 | 0.0000 |
| 301 | 3 | 3550.3215 | 0.0005 |
| 302 | 3 | 3550.3268 | 0.0060 |
| 303 | 1 | 3550.3328 | 0.0000 |
| 304 | 2 | 3550.3394 | 0.0003 |
| 305 | 3 | 3550.3397 | 0.0005 |
| 306 | 2 | 3550.3461 | 0.0004 |
| 307 | 6 | 3550.3472 | 0.0014 |
| 308 | 1 | 3550.3507 | 0.0000 |
| 309 | 3 | 3550.3515 | 0.0000 |
| 310 | 3 | 3550.3537 | 0.0002 |
| 311 | 3 | 3550.3579 | 0.0000 |
| 312 | 3 | 3550.3606 | 0.0004 |
| 313 | 2 | 3550.3695 | 0.0001 |
| 314 | 3 | 3550.3804 | 0.0003 |
| 315 | 2 | 3550.3820 | 0.0001 |
| 316 | 3 | 3550.3886 | 0.0000 |
| 317 | 3 | 3550.3903 | 0.0013 |
| 318 | 3 | 3550.3978 | 0.0005 |
| 319 | 1 | 3550.4034 | 0.0000 |
| 320 | 3 | 3550.4041 | 0.0002 |
| 321 | 2 | 3550.4087 | 0.0043 |
| 322 | 3 | 3550.4197 | 0.0008 |
| 323 | 2 | 3550.4230 | 0.0005 |
| 324 | 3 | 3550.4236 | 0.0003 |
| 325 | 1 | 3550.4297 | 0.0001 |
| 326 | 3 | 3550.4307 | 0.0019 |
| 327 | 3 | 3550.4425 | 0.0004 |
| 328 | 1 | 3550.4452 | 0.0005 |
| 329 | 3 | 3550.4541 | 0.0026 |
| 330 | 2 | 3550.4543 | 0.0000 |
| 331 | 3 | 3550.4546 | 0.0008 |
| 332 | 3 | 3550.4566 | 0.0003 |
| 333 | 4 | 3550.4699 | 0.0020 |
| 334 | 1 | 3550.4713 | 0.0000 |
| 335 | 3 | 3550.4741 | 0.0010 |
| 336 | 2 | 3550.4758 | 0.0000 |
| 337 | 1 | 3550.4839 | 0.0003 |
| 338 | 3 | 3550.4894 | 0.0003 |
| 339 | 3 | 3550.4905 | 0.0030 |
| 340 | 2 | 3550.4931 | 0.0002 |
| 341 | 3 | 3550.5028 | 0.0000 |
| 342 | 3 | 3550.5047 | 0.0008 |

|     |   |           |        |
|-----|---|-----------|--------|
| 343 | 3 | 3550.5127 | 0.0012 |
| 344 | 3 | 3550.5142 | 0.0002 |
| 345 | 3 | 3550.5284 | 0.0000 |
| 346 | 2 | 3550.5292 | 0.0008 |
| 347 | 1 | 3550.5391 | 0.0040 |
| 348 | 3 | 3550.5415 | 0.0008 |
| 349 | 1 | 3550.5431 | 0.0000 |
| 350 | 3 | 3550.5439 | 0.0015 |
| 351 | 3 | 3550.5467 | 0.0032 |
| 352 | 3 | 3550.5551 | 0.0010 |
| 353 | 3 | 3550.5588 | 0.0002 |
| 354 | 1 | 3550.5597 | 0.0012 |
| 355 | 2 | 3550.5622 | 0.0007 |
| 356 | 3 | 3550.5763 | 0.0010 |
| 357 | 3 | 3550.5806 | 0.0000 |
| 358 | 3 | 3550.5877 | 0.0003 |
| 359 | 3 | 3550.5898 | 0.0012 |
| 360 | 3 | 3550.5914 | 0.0015 |
| 361 | 1 | 3550.5974 | 0.0000 |
| 362 | 2 | 3550.6013 | 0.0005 |
| 363 | 3 | 3550.6031 | 0.0006 |
| 364 | 3 | 3550.6059 | 0.0031 |
| 365 | 3 | 3550.6183 | 0.0001 |
| 366 | 1 | 3550.6239 | 0.0000 |
| 367 | 3 | 3550.6268 | 0.0002 |
| 368 | 1 | 3550.6287 | 0.0010 |
| 369 | 2 | 3550.6290 | 0.0004 |
| 370 | 1 | 3550.6320 | 0.0000 |
| 371 | 3 | 3550.6366 | 0.0001 |
| 372 | 3 | 3550.6377 | 0.0001 |
| 373 | 3 | 3550.6426 | 0.0006 |
| 374 | 3 | 3550.6503 | 0.0011 |
| 375 | 3 | 3550.6511 | 0.0008 |
| 376 | 2 | 3550.6545 | 0.0000 |
| 377 | 3 | 3550.6628 | 0.0000 |
| 378 | 3 | 3550.6629 | 0.0008 |
| 379 | 2 | 3550.6661 | 0.0003 |
| 380 | 3 | 3550.6703 | 0.0001 |
| 381 | 3 | 3550.6721 | 0.0014 |
| 382 | 2 | 3550.6730 | 0.0001 |
| 383 | 1 | 3550.6824 | 0.0000 |
| 384 | 3 | 3550.6870 | 0.0000 |
| 385 | 3 | 3550.6915 | 0.0036 |
| 386 | 1 | 3550.6965 | 0.0020 |
| 387 | 2 | 3550.7018 | 0.0040 |
| 388 | 1 | 3550.7030 | 0.0038 |
| 389 | 3 | 3550.7040 | 0.0013 |
| 390 | 3 | 3550.7051 | 0.0004 |
| 391 | 3 | 3550.7134 | 0.0000 |
| 392 | 3 | 3550.7168 | 0.0000 |
| 393 | 3 | 3550.7248 | 0.0012 |
| 394 | 2 | 3550.7350 | 0.0016 |
| 395 | 3 | 3550.7396 | 0.0000 |
| 396 | 3 | 3550.7409 | 0.0009 |
| 397 | 3 | 3550.7422 | 0.0003 |
| 398 | 3 | 3550.7549 | 0.0002 |
| 399 | 1 | 3550.7571 | 0.0000 |
| 400 | 2 | 3550.7607 | 0.0000 |
| 401 | 1 | 3550.7622 | 0.0000 |
| 402 | 3 | 3550.7704 | 0.0013 |
| 403 | 2 | 3550.7744 | 0.0016 |
| 404 | 3 | 3550.7763 | 0.0007 |
| 405 | 1 | 3550.7812 | 0.0000 |
| 406 | 3 | 3550.7813 | 0.0050 |
| 407 | 1 | 3550.7829 | 0.0003 |
| 408 | 2 | 3550.7858 | 0.0000 |
| 409 | 3 | 3550.7866 | 0.0026 |
| 410 | 3 | 3550.7888 | 0.0007 |
| 411 | 3 | 3550.7940 | 0.0000 |
| 412 | 2 | 3550.7979 | 0.0016 |
| 413 | 3 | 3550.7987 | 0.0009 |
| 414 | 3 | 3550.8121 | 0.0000 |
| 415 | 3 | 3550.8151 | 0.0008 |
| 416 | 1 | 3550.8197 | 0.0000 |
| 417 | 3 | 3550.8253 | 0.0000 |
| 418 | 3 | 3550.8273 | 0.0035 |
| 419 | 3 | 3550.8304 | 0.0046 |
| 420 | 2 | 3550.8336 | 0.0002 |
| 421 | 1 | 3550.8390 | 0.0063 |
| 422 | 3 | 3550.8395 | 0.0015 |
| 423 | 3 | 3550.8442 | 0.0003 |
| 424 | 2 | 3550.8466 | 0.0067 |
| 425 | 3 | 3550.8478 | 0.0000 |
| 426 | 3 | 3550.8487 | 0.0001 |
| 427 | 1 | 3550.8512 | 0.0000 |
| 428 | 1 | 3550.8568 | 0.0013 |
| 429 | 5 | 3550.8675 | 0.0005 |

|     |   |           |        |
|-----|---|-----------|--------|
| 430 | 3 | 3550.8678 | 0.0001 |
| 431 | 1 | 3550.8773 | 0.0000 |
| 432 | 2 | 3550.8805 | 0.0011 |
| 433 | 3 | 3550.8850 | 0.0042 |
| 434 | 2 | 3550.8893 | 0.0000 |
| 435 | 1 | 3550.8905 | 0.0000 |
| 436 | 3 | 3550.8913 | 0.0004 |
| 437 | 2 | 3550.8989 | 0.0023 |
| 438 | 3 | 3550.9007 | 0.0002 |
| 439 | 3 | 3550.9020 | 0.0001 |
| 440 | 3 | 3550.9055 | 0.0007 |
| 441 | 3 | 3550.9187 | 0.0007 |
| 442 | 2 | 3550.9197 | 0.0000 |
| 443 | 3 | 3550.9224 | 0.0010 |
| 444 | 1 | 3550.9246 | 0.0000 |
| 445 | 3 | 3550.9299 | 0.0020 |
| 446 | 3 | 3550.9326 | 0.0002 |
| 447 | 3 | 3550.9400 | 0.0000 |
| 448 | 1 | 3550.9405 | 0.0005 |
| 449 | 3 | 3550.9430 | 0.0039 |
| 450 | 3 | 3550.9457 | 0.0022 |
| 451 | 2 | 3550.9487 | 0.0002 |
| 452 | 3 | 3550.9522 | 0.0016 |
| 453 | 3 | 3550.9577 | 0.0010 |
| 454 | 3 | 3550.9609 | 0.0094 |
| 455 | 3 | 3550.9644 | 0.0021 |
| 456 | 3 | 3550.9696 | 0.0069 |
| 457 | 3 | 3550.9716 | 0.0014 |
| 458 | 2 | 3550.9764 | 0.0005 |
| 459 | 1 | 3550.9766 | 0.0010 |
| 460 | 3 | 3550.9777 | 0.0046 |
| 461 | 2 | 3550.9825 | 0.0035 |
| 462 | 3 | 3550.9893 | 0.0021 |
| 463 | 3 | 3550.9930 | 0.0000 |
| 464 | 2 | 3550.9977 | 0.0003 |
| 465 | 3 | 3550.9994 | 0.0000 |
| 466 | 1 | 3551.0038 | 0.0000 |
| 467 | 3 | 3551.0113 | 0.0023 |
| 468 | 3 | 3551.0114 | 0.0006 |
| 469 | 2 | 3551.0165 | 0.0023 |
| 470 | 1 | 3551.0212 | 0.0000 |
| 471 | 1 | 3551.0216 | 0.0008 |
| 472 | 3 | 3551.0244 | 0.0015 |
| 473 | 3 | 3551.0388 | 0.0000 |
| 474 | 3 | 3551.0480 | 0.0000 |
| 475 | 3 | 3551.0494 | 0.0005 |
| 476 | 3 | 3551.0563 | 0.0028 |
| 477 | 3 | 3551.0585 | 0.0021 |
| 478 | 2 | 3551.0635 | 0.0070 |
| 479 | 3 | 3551.0771 | 0.0001 |
| 480 | 3 | 3551.0856 | 0.0002 |
| 481 | 2 | 3551.0860 | 0.0029 |
| 482 | 1 | 3551.0973 | 0.0001 |
| 483 | 3 | 3551.0975 | 0.0003 |
| 484 | 3 | 3551.0979 | 0.0015 |
| 485 | 1 | 3551.1026 | 0.0000 |
| 486 | 1 | 3551.1046 | 0.0015 |
| 487 | 2 | 3551.1066 | 0.0009 |
| 488 | 3 | 3551.1075 | 0.0063 |
| 489 | 3 | 3551.1113 | 0.0012 |
| 490 | 2 | 3551.1150 | 0.0256 |
| 491 | 4 | 3551.1247 | 0.0004 |
| 492 | 1 | 3551.1330 | 0.0000 |
| 493 | 2 | 3551.1411 | 0.0045 |
| 494 | 3 | 3551.1447 | 0.0070 |
| 495 | 6 | 3551.1506 | 0.0361 |
| 496 | 3 | 3551.1577 | 0.0000 |
| 497 | 1 | 3551.1592 | 0.0000 |
| 498 | 3 | 3551.1612 | 0.0000 |
| 499 | 2 | 3551.1657 | 0.0035 |
| 500 | 3 | 3551.1743 | 0.0006 |
| 501 | 1 | 3551.1752 | 0.0000 |
| 502 | 3 | 3551.1773 | 0.0001 |
| 503 | 3 | 3551.1839 | 0.0007 |
| 504 | 2 | 3551.1854 | 0.0002 |
| 505 | 3 | 3551.1875 | 0.0033 |
| 506 | 3 | 3551.1938 | 0.0000 |
| 507 | 3 | 3551.2009 | 0.0121 |
| 508 | 3 | 3551.2085 | 0.0023 |
| 509 | 2 | 3551.2136 | 0.0007 |
| 510 | 3 | 3551.2242 | 0.0024 |
| 511 | 3 | 3551.2278 | 0.0125 |
| 512 | 1 | 3551.2285 | 0.0006 |
| 513 | 1 | 3551.2366 | 0.0000 |
| 514 | 2 | 3551.2370 | 0.0025 |
| 515 | 3 | 3551.2403 | 0.0000 |
| 516 | 3 | 3551.2453 | 0.0226 |

|     |   |           |        |
|-----|---|-----------|--------|
| 517 | 3 | 3551.2464 | 0.0004 |
| 518 | 2 | 3551.2465 | 0.0032 |
| 519 | 3 | 3551.2571 | 0.0004 |
| 520 | 1 | 3551.2627 | 0.0000 |
| 521 | 3 | 3551.2697 | 0.0011 |
| 522 | 2 | 3551.2700 | 0.0006 |
| 523 | 3 | 3551.2719 | 0.0001 |
| 524 | 1 | 3551.2744 | 0.0000 |
| 525 | 3 | 3551.2781 | 0.0179 |
| 526 | 3 | 3551.2825 | 0.0017 |
| 527 | 3 | 3551.2859 | 0.0018 |
| 528 | 3 | 3551.2985 | 0.0000 |
| 529 | 3 | 3551.3028 | 0.0012 |
| 530 | 3 | 3551.3033 | 0.0132 |
| 531 | 2 | 3551.3070 | 0.0047 |
| 532 | 3 | 3551.3140 | 0.0034 |
| 533 | 3 | 3551.3212 | 0.0098 |
| 534 | 2 | 3551.3251 | 0.0005 |
| 535 | 1 | 3551.3320 | 0.0000 |
| 536 | 3 | 3551.3354 | 0.0087 |
| 537 | 3 | 3551.3368 | 0.0008 |
| 538 | 3 | 3551.3425 | 0.0043 |
| 539 | 1 | 3551.3436 | 0.0013 |
| 540 | 2 | 3551.3453 | 0.0026 |
| 541 | 3 | 3551.3532 | 0.0001 |
| 542 | 2 | 3551.3544 | 0.0071 |
| 543 | 1 | 3551.3577 | 0.0000 |
| 544 | 1 | 3551.3604 | 0.0054 |
| 545 | 3 | 3551.3681 | 0.0014 |
| 546 | 3 | 3551.3705 | 0.0009 |
| 547 | 3 | 3551.3760 | 0.0024 |
| 548 | 2 | 3551.3792 | 0.0000 |
| 549 | 3 | 3551.3990 | 0.0004 |
| 550 | 1 | 3551.3992 | 0.0005 |
| 551 | 2 | 3551.4016 | 0.0001 |
| 552 | 3 | 3551.4031 | 0.0000 |
| 553 | 3 | 3551.4070 | 0.0008 |
| 554 | 3 | 3551.4111 | 0.0001 |
| 555 | 3 | 3551.4142 | 0.0003 |
| 556 | 2 | 3551.4167 | 0.0024 |
| 557 | 3 | 3551.4202 | 0.0002 |
| 558 | 1 | 3551.4206 | 0.0009 |
| 559 | 1 | 3551.4292 | 0.0000 |
| 560 | 3 | 3551.4329 | 0.0044 |
| 561 | 3 | 3551.4363 | 0.0038 |
| 562 | 3 | 3551.4373 | 0.0001 |
| 563 | 1 | 3551.4385 | 0.0066 |
| 564 | 1 | 3551.4422 | 0.0025 |
| 565 | 1 | 3551.4464 | 0.0008 |
| 566 | 3 | 3551.4525 | 0.0000 |
| 567 | 3 | 3551.4530 | 0.0050 |
| 568 | 2 | 3551.4595 | 0.0006 |
| 569 | 3 | 3551.4602 | 0.0038 |
| 570 | 5 | 3551.4670 | 0.0084 |
| 571 | 3 | 3551.4745 | 0.0012 |
| 572 | 3 | 3551.4812 | 0.0004 |
| 573 | 3 | 3551.4848 | 0.0005 |
| 574 | 2 | 3551.4894 | 0.0001 |
| 575 | 1 | 3551.4969 | 0.0000 |
| 576 | 3 | 3551.4990 | 0.0010 |
| 577 | 2 | 3551.5019 | 0.0011 |
| 578 | 3 | 3551.5053 | 0.0002 |
| 579 | 3 | 3551.5062 | 0.0031 |
| 580 | 3 | 3551.5091 | 0.0030 |
| 581 | 2 | 3551.5149 | 0.0027 |
| 582 | 3 | 3551.5208 | 0.0023 |
| 583 | 3 | 3551.5267 | 0.0013 |
| 584 | 3 | 3551.5275 | 0.0012 |
| 585 | 1 | 3551.5328 | 0.0000 |
| 586 | 3 | 3551.5365 | 0.0009 |
| 587 | 1 | 3551.5369 | 0.0028 |
| 588 | 2 | 3551.5446 | 0.0094 |
| 589 | 3 | 3551.5464 | 0.0019 |
| 590 | 3 | 3551.5478 | 0.0001 |
| 591 | 3 | 3551.5590 | 0.0001 |
| 592 | 3 | 3551.5598 | 0.0004 |
| 593 | 2 | 3551.5696 | 0.0020 |
| 594 | 6 | 3551.5752 | 0.0003 |
| 595 | 1 | 3551.5807 | 0.0000 |
| 596 | 2 | 3551.5875 | 0.0005 |
| 597 | 3 | 3551.5903 | 0.0000 |
| 598 | 3 | 3551.5939 | 0.0029 |
| 599 | 3 | 3551.5943 | 0.0017 |
| 600 | 2 | 3551.5974 | 0.0002 |
| 601 | 3 | 3551.6074 | 0.0035 |
| 602 | 3 | 3551.6078 | 0.0004 |
| 603 | 1 | 3551.6111 | 0.0009 |

|     |   |           |        |
|-----|---|-----------|--------|
| 604 | 2 | 3551.6177 | 0.0001 |
| 605 | 3 | 3551.6192 | 0.0001 |
| 606 | 3 | 3551.6248 | 0.0000 |
| 607 | 1 | 3551.6285 | 0.0000 |
| 608 | 1 | 3551.6452 | 0.0000 |
| 609 | 3 | 3551.6458 | 0.0001 |
| 610 | 3 | 3551.6472 | 0.0000 |
| 611 | 1 | 3551.6488 | 0.0003 |
| 612 | 2 | 3551.6521 | 0.0000 |
| 613 | 3 | 3551.6545 | 0.0016 |
| 614 | 2 | 3551.6564 | 0.0004 |
| 615 | 3 | 3551.6598 | 0.0017 |
| 616 | 3 | 3551.6604 | 0.0002 |
| 617 | 3 | 3551.6738 | 0.0000 |
| 618 | 3 | 3551.6807 | 0.0019 |
| 619 | 2 | 3551.6938 | 0.0002 |
| 620 | 3 | 3551.6944 | 0.0016 |
| 621 | 3 | 3551.6966 | 0.0044 |
| 622 | 3 | 3551.7001 | 0.0003 |
| 623 | 1 | 3551.7003 | 0.0002 |
| 624 | 3 | 3551.7049 | 0.0009 |
| 625 | 1 | 3551.7109 | 0.0000 |
| 626 | 3 | 3551.7246 | 0.0021 |
| 627 | 3 | 3551.7274 | 0.0001 |
| 628 | 3 | 3551.7296 | 0.0006 |
| 629 | 2 | 3551.7303 | 0.0008 |
| 630 | 3 | 3551.7407 | 0.0014 |
| 631 | 1 | 3551.7460 | 0.0068 |
| 632 | 3 | 3551.7525 | 0.0020 |
| 633 | 2 | 3551.7580 | 0.0001 |
| 634 | 2 | 3551.7610 | 0.0013 |
| 635 | 1 | 3551.7631 | 0.0000 |
| 636 | 3 | 3551.7660 | 0.0004 |
| 637 | 3 | 3551.7671 | 0.0008 |
| 638 | 3 | 3551.7762 | 0.0002 |
| 639 | 3 | 3551.7797 | 0.0018 |
| 640 | 3 | 3551.7871 | 0.0001 |
| 641 | 3 | 3551.7896 | 0.0001 |
| 642 | 2 | 3551.7920 | 0.0002 |
| 643 | 3 | 3551.7957 | 0.0001 |
| 644 | 3 | 3551.7982 | 0.0002 |
| 645 | 1 | 3551.7987 | 0.0000 |
| 646 | 1 | 3551.8015 | 0.0023 |
| 647 | 3 | 3551.8129 | 0.0006 |
| 648 | 2 | 3551.8195 | 0.0002 |
| 649 | 3 | 3551.8255 | 0.0005 |
| 650 | 3 | 3551.8311 | 0.0009 |
| 651 | 1 | 3551.8324 | 0.0009 |
| 652 | 2 | 3551.8348 | 0.0000 |
| 653 | 3 | 3551.8407 | 0.0007 |
| 654 | 3 | 3551.8482 | 0.0000 |
| 655 | 3 | 3551.8517 | 0.0000 |
| 656 | 1 | 3551.8558 | 0.0000 |
| 657 | 2 | 3551.8597 | 0.0005 |
| 658 | 3 | 3551.8607 | 0.0005 |
| 659 | 3 | 3551.8616 | 0.0000 |
| 660 | 1 | 3551.8649 | 0.0000 |
| 661 | 3 | 3551.8686 | 0.0002 |
| 662 | 2 | 3551.8699 | 0.0001 |
| 663 | 3 | 3551.8805 | 0.0001 |
| 664 | 3 | 3551.8879 | 0.0002 |
| 665 | 3 | 3551.8903 | 0.0000 |
| 666 | 3 | 3551.8982 | 0.0000 |
| 667 | 3 | 3551.9059 | 0.0003 |
| 668 | 3 | 3551.9138 | 0.0000 |
| 669 | 2 | 3551.9146 | 0.0000 |
| 670 | 3 | 3551.9239 | 0.0004 |
| 671 | 1 | 3551.9317 | 0.0000 |
| 672 | 2 | 3551.9354 | 0.0002 |
| 673 | 3 | 3551.9369 | 0.0003 |
| 674 | 1 | 3551.9446 | 0.0016 |
| 675 | 3 | 3551.9512 | 0.0002 |
| 676 | 3 | 3551.9564 | 0.0001 |
| 677 | 2 | 3551.9569 | 0.0001 |
| 678 | 1 | 3551.9687 | 0.0002 |
| 679 | 3 | 3551.9758 | 0.0000 |
| 680 | 3 | 3551.9805 | 0.0002 |
| 681 | 2 | 3551.9859 | 0.0000 |
| 682 | 1 | 3551.9891 | 0.0014 |
| 683 | 3 | 3551.9954 | 0.0015 |
| 684 | 3 | 3552.0057 | 0.0001 |
| 685 | 2 | 3552.0068 | 0.0001 |
| 686 | 2 | 3552.0191 | 0.0002 |
| 687 | 3 | 3552.0197 | 0.0001 |
| 688 | 3 | 3552.0304 | 0.0005 |
| 689 | 3 | 3552.0306 | 0.0000 |
| 690 | 4 | 3552.0324 | 0.0000 |

|     |   |           |        |
|-----|---|-----------|--------|
| 691 | 3 | 3552.0377 | 0.0000 |
| 692 | 2 | 3552.0503 | 0.0000 |
| 693 | 1 | 3552.0520 | 0.0008 |
| 694 | 3 | 3552.0557 | 0.0000 |
| 695 | 3 | 3552.0580 | 0.0016 |
| 696 | 3 | 3552.0642 | 0.0001 |
| 697 | 1 | 3552.0663 | 0.0000 |
| 698 | 3 | 3552.0671 | 0.0002 |
| 699 | 1 | 3552.0745 | 0.0000 |
| 700 | 3 | 3552.0813 | 0.0004 |
| 701 | 2 | 3552.0907 | 0.0001 |
| 702 | 1 | 3552.1036 | 0.0004 |
| 703 | 3 | 3552.1048 | 0.0000 |
| 704 | 2 | 3552.1095 | 0.0000 |
| 705 | 3 | 3552.1186 | 0.0002 |
| 706 | 3 | 3552.1285 | 0.0003 |
| 707 | 1 | 3552.1315 | 0.0000 |
| 708 | 2 | 3552.1319 | 0.0000 |
| 709 | 3 | 3552.1360 | 0.0000 |
| 710 | 1 | 3552.1440 | 0.0002 |
| 711 | 2 | 3552.1462 | 0.0000 |
| 712 | 3 | 3552.1477 | 0.0002 |
| 713 | 3 | 3552.1482 | 0.0006 |
| 714 | 3 | 3552.1687 | 0.0000 |
| 715 | 3 | 3552.1696 | 0.0003 |
| 716 | 3 | 3552.1753 | 0.0003 |
| 717 | 3 | 3552.1889 | 0.0001 |
| 718 | 3 | 3552.1921 | 0.0001 |
| 719 | 3 | 3552.1972 | 0.0001 |
| 720 | 2 | 3552.1979 | 0.0002 |
| 721 | 3 | 3552.1999 | 0.0003 |
| 722 | 1 | 3552.2104 | 0.0000 |
| 723 | 3 | 3552.2279 | 0.0004 |
| 724 | 3 | 3552.2317 | 0.0000 |
| 725 | 3 | 3552.2334 | 0.0001 |
| 726 | 1 | 3552.2365 | 0.0031 |
| 727 | 2 | 3552.2471 | 0.0000 |
| 728 | 3 | 3552.2513 | 0.0005 |
| 729 | 1 | 3552.2619 | 0.0000 |
| 730 | 6 | 3552.2691 | 0.0004 |
| 731 | 3 | 3552.2745 | 0.0000 |
| 732 | 2 | 3552.2850 | 0.0000 |
| 733 | 3 | 3552.2901 | 0.0011 |
| 734 | 3 | 3552.2950 | 0.0000 |
| 735 | 1 | 3552.2967 | 0.0018 |
| 736 | 3 | 3552.3075 | 0.0019 |
| 737 | 2 | 3552.3102 | 0.0002 |
| 738 | 3 | 3552.3331 | 0.0001 |
| 739 | 3 | 3552.3406 | 0.0001 |
| 740 | 1 | 3552.3447 | 0.0000 |
| 741 | 3 | 3552.3466 | 0.0002 |
| 742 | 1 | 3552.3605 | 0.0000 |
| 743 | 2 | 3552.3652 | 0.0001 |
| 744 | 3 | 3552.3781 | 0.0000 |
| 745 | 3 | 3552.3815 | 0.0000 |
| 746 | 2 | 3552.3885 | 0.0002 |
| 747 | 3 | 3552.3911 | 0.0000 |
| 748 | 3 | 3552.4078 | 0.0000 |
| 749 | 3 | 3552.4291 | 0.0007 |
| 750 | 1 | 3552.4341 | 0.0000 |
| 751 | 3 | 3552.4386 | 0.0000 |
| 752 | 3 | 3552.4501 | 0.0002 |
| 753 | 1 | 3552.4521 | 0.0004 |
| 754 | 2 | 3552.4596 | 0.0000 |
| 755 | 1 | 3552.4602 | 0.0000 |
| 756 | 3 | 3552.4735 | 0.0003 |
| 757 | 3 | 3552.4749 | 0.0001 |
| 758 | 3 | 3552.4833 | 0.0000 |
| 759 | 2 | 3552.4916 | 0.0000 |
| 760 | 3 | 3552.5116 | 0.0002 |
| 761 | 3 | 3552.5207 | 0.0000 |
| 762 | 3 | 3552.5223 | 0.0005 |
| 763 | 2 | 3552.5277 | 0.0000 |
| 764 | 1 | 3552.5427 | 0.0000 |
| 765 | 2 | 3552.5494 | 0.0000 |
| 766 | 3 | 3552.5640 | 0.0008 |
| 767 | 1 | 3552.5678 | 0.0000 |
| 768 | 3 | 3552.5700 | 0.0001 |
| 769 | 3 | 3552.5724 | 0.0000 |
| 770 | 3 | 3552.5903 | 0.0000 |
| 771 | 2 | 3552.5984 | 0.0001 |
| 772 | 1 | 3552.6145 | 0.0000 |
| 773 | 3 | 3552.6259 | 0.0000 |
| 774 | 3 | 3552.6438 | 0.0001 |
| 775 | 3 | 3552.6486 | 0.0000 |
| 776 | 1 | 3552.6766 | 0.0000 |
| 777 | 3 | 3552.6838 | 0.0001 |



|     |   |           |        |
|-----|---|-----------|--------|
| 778 | 2 | 3552.6853 | 0.0000 |
| 779 | 3 | 3552.7402 | 0.0000 |
| 780 | 2 | 3552.7432 | 0.0000 |
| 781 | 3 | 3552.7521 | 0.0000 |
| 782 | 3 | 3552.7544 | 0.0000 |
| 783 | 1 | 3552.7693 | 0.0000 |
| 784 | 3 | 3552.7880 | 0.0000 |
| 785 | 2 | 3552.7948 | 0.0000 |
| 786 | 3 | 3552.7979 | 0.0001 |
| 787 | 3 | 3552.8069 | 0.0000 |
| 788 | 1 | 3552.8086 | 0.0000 |
| 789 | 3 | 3552.8124 | 0.0000 |
| 790 | 3 | 3552.8275 | 0.0000 |
| 791 | 2 | 3552.8352 | 0.0000 |
| 792 | 3 | 3552.8429 | 0.0000 |
| 793 | 2 | 3552.8476 | 0.0001 |
| 794 | 3 | 3552.8581 | 0.0000 |
| 795 | 1 | 3552.8668 | 0.0001 |
| 796 | 3 | 3552.8748 | 0.0001 |
| 797 | 3 | 3552.8765 | 0.0000 |
| 798 | 1 | 3552.8989 | 0.0000 |
| 799 | 3 | 3552.8993 | 0.0000 |
| 800 | 3 | 3552.9002 | 0.0000 |
| 801 | 2 | 3552.9055 | 0.0000 |
| 802 | 1 | 3552.9224 | 0.0000 |
| 803 | 2 | 3552.9234 | 0.0000 |
| 804 | 1 | 3552.9358 | 0.0000 |
| 805 | 3 | 3552.9395 | 0.0000 |
| 806 | 3 | 3552.9440 | 0.0000 |
| 807 | 3 | 3552.9640 | 0.0000 |
| 808 | 3 | 3552.9858 | 0.0000 |
| 809 | 3 | 3552.9980 | 0.0000 |
| 810 | 3 | 3553.0061 | 0.0000 |
| 811 | 2 | 3553.0268 | 0.0000 |
| 812 | 1 | 3553.0298 | 0.0000 |
| 813 | 3 | 3553.0350 | 0.0000 |
| 814 | 3 | 3553.0375 | 0.0000 |
| 815 | 3 | 3553.0527 | 0.0000 |
| 816 | 3 | 3553.0552 | 0.0000 |
| 817 | 1 | 3553.0700 | 0.0002 |
| 818 | 3 | 3553.0766 | 0.0000 |
| 819 | 3 | 3553.0860 | 0.0000 |
| 820 | 2 | 3553.0968 | 0.0000 |
| 821 | 3 | 3553.1099 | 0.0000 |
| 822 | 3 | 3553.1554 | 0.0000 |
| 823 | 1 | 3553.1766 | 0.0000 |
| 824 | 3 | 3553.1818 | 0.0000 |
| 825 | 3 | 3553.1822 | 0.0000 |
| 826 | 2 | 3553.1884 | 0.0000 |
| 827 | 3 | 3553.1903 | 0.0000 |
| 828 | 1 | 3553.2100 | 0.0003 |
| 829 | 3 | 3553.2250 | 0.0000 |
| 830 | 2 | 3553.2321 | 0.0000 |
| 831 | 3 | 3553.2466 | 0.0001 |
| 832 | 3 | 3553.2552 | 0.0001 |
| 833 | 3 | 3553.2558 | 0.0000 |
| 834 | 2 | 3553.2582 | 0.0000 |
| 835 | 3 | 3553.2683 | 0.0000 |
| 836 | 1 | 3553.2789 | 0.0000 |
| 837 | 3 | 3553.2948 | 0.0002 |
| 838 | 3 | 3553.3031 | 0.0001 |
| 839 | 1 | 3553.3096 | 0.0002 |
| 840 | 3 | 3553.3290 | 0.0000 |
| 841 | 2 | 3553.3577 | 0.0000 |
| 842 | 3 | 3553.3722 | 0.0000 |
| 843 | 3 | 3553.3985 | 0.0001 |
| 844 | 3 | 3553.3991 | 0.0000 |
| 845 | 2 | 3553.4264 | 0.0000 |
| 846 | 3 | 3553.4448 | 0.0002 |
| 847 | 3 | 3553.4504 | 0.0000 |
| 848 | 1 | 3553.5074 | 0.0000 |
| 849 | 3 | 3553.5087 | 0.0000 |
| 850 | 1 | 3553.5272 | 0.0000 |
| 851 | 3 | 3553.5535 | 0.0001 |
| 852 | 1 | 3553.5561 | 0.0001 |
| 853 | 2 | 3553.6036 | 0.0000 |
| 854 | 3 | 3553.6438 | 0.0000 |
| 855 | 3 | 3553.6696 | 0.0000 |
| 856 | 2 | 3553.6800 | 0.0000 |
| 857 | 3 | 3553.6965 | 0.0000 |
| 858 | 3 | 3553.7329 | 0.0000 |
| 859 | 3 | 3553.7498 | 0.0000 |
| 860 | 3 | 3553.9872 | 0.0000 |
| 861 | 5 | 3554.3671 | 0.0000 |
| 862 | 3 | 3554.4163 | 0.0000 |
| 863 | 3 | 3554.4165 | 0.0000 |
| 864 | 1 | 3554.4195 | 0.0000 |

|     |   |           |        |
|-----|---|-----------|--------|
| 865 | 1 | 3554.4310 | 0.0000 |
| 866 | 3 | 3554.6409 | 0.0000 |
| 867 | 2 | 3554.6743 | 0.0000 |
| 868 | 3 | 3554.7321 | 0.0000 |
| 869 | 1 | 3554.7638 | 0.0000 |
| 870 | 3 | 3554.7688 | 0.0000 |
| 871 | 3 | 3554.7866 | 0.0000 |
| 872 | 3 | 3554.7950 | 0.0000 |
| 873 | 2 | 3554.8264 | 0.0000 |
| 874 | 3 | 3554.8484 | 0.0000 |
| 875 | 2 | 3554.8610 | 0.0000 |
| 876 | 1 | 3554.8657 | 0.0000 |
| 877 | 3 | 3554.8737 | 0.0000 |
| 878 | 3 | 3554.9454 | 0.0000 |
| 879 | 3 | 3555.0202 | 0.0000 |
| 880 | 1 | 3555.0238 | 0.0000 |
| 881 | 3 | 3555.0527 | 0.0000 |
| 882 | 2 | 3555.0676 | 0.0000 |
| 883 | 1 | 3555.1071 | 0.0000 |
| 884 | 3 | 3555.1305 | 0.0000 |
| 885 | 3 | 3555.1327 | 0.0000 |
| 886 | 3 | 3555.1792 | 0.0000 |
| 887 | 3 | 3555.2075 | 0.0000 |
| 888 | 2 | 3555.2152 | 0.0000 |
| 889 | 1 | 3555.2681 | 0.0000 |
| 890 | 3 | 3555.2708 | 0.0000 |
| 891 | 2 | 3555.2921 | 0.0000 |
| 892 | 3 | 3555.3028 | 0.0001 |
| 893 | 3 | 3555.3271 | 0.0000 |
| 894 | 3 | 3555.6171 | 0.0000 |

**Table S3** Numerical values for the multiplet energy levels, degeneracies and oscillator strength calculated for the  $3d^{10}5f^2 \rightarrow 3d^9 5f^3$  transitions of  $U^{4+}$  in  $UO_2$  represented graphically in the lower panel of Figure 5.

| #  | Multiplicity | Energy levels [eV] | Oscillator strength [-] |
|----|--------------|--------------------|-------------------------|
| 1  | 1            | 3727.3951          | 0.0000                  |
| 2  | 1            | 3727.4010          | 0.0001                  |
| 3  | 3            | 3727.4084          | 0.0002                  |
| 4  | 3            | 3727.4116          | 0.0002                  |
| 5  | 2            | 3727.5158          | 0.0025                  |
| 6  | 3            | 3727.5268          | 0.0001                  |
| 7  | 3            | 3727.6899          | 0.0177                  |
| 8  | 2            | 3727.7629          | 0.0077                  |
| 9  | 3            | 3727.7779          | 0.0001                  |
| 10 | 3            | 3727.7876          | 0.0017                  |
| 11 | 3            | 3727.9534          | 0.0002                  |
| 12 | 3            | 3727.9572          | 0.0003                  |
| 13 | 2            | 3727.9618          | 0.0001                  |
| 14 | 3            | 3727.9731          | 0.0001                  |
| 15 | 1            | 3727.9829          | 0.0014                  |
| 16 | 3            | 3728.0264          | 0.0005                  |
| 17 | 3            | 3728.0801          | 0.0000                  |
| 18 | 3            | 3728.0813          | 0.0000                  |
| 19 | 1            | 3728.0988          | 0.0043                  |
| 20 | 1            | 3728.1051          | 0.0000                  |
| 21 | 2            | 3728.1457          | 0.0062                  |
| 22 | 3            | 3728.1505          | 0.0188                  |
| 23 | 3            | 3728.1881          | 0.0004                  |
| 24 | 3            | 3728.1993          | 0.0001                  |
| 25 | 2            | 3728.2220          | 0.0001                  |
| 26 | 3            | 3728.2427          | 0.0016                  |
| 27 | 3            | 3728.2430          | 0.0031                  |
| 28 | 1            | 3728.2721          | 0.0000                  |
| 29 | 1            | 3728.2811          | 0.0000                  |
| 30 | 3            | 3728.3075          | 0.0006                  |
| 31 | 2            | 3728.3102          | 0.0001                  |
| 32 | 1            | 3728.3405          | 0.0000                  |
| 33 | 3            | 3728.3610          | 0.0006                  |
| 34 | 3            | 3728.3938          | 0.0002                  |
| 35 | 3            | 3728.3990          | 0.0036                  |
| 36 | 2            | 3728.4026          | 0.0001                  |
| 37 | 3            | 3728.4107          | 0.0001                  |
| 38 | 3            | 3728.4457          | 0.0218                  |
| 39 | 3            | 3728.4647          | 0.0121                  |
| 40 | 2            | 3728.4998          | 0.0009                  |
| 41 | 3            | 3728.5072          | 0.0025                  |
| 42 | 2            | 3728.5101          | 0.0105                  |
| 43 | 3            | 3728.5159          | 0.0008                  |
| 44 | 1            | 3728.5265          | 0.0000                  |
| 45 | 3            | 3728.5664          | 0.0003                  |
| 46 | 1            | 3728.5703          | 0.0008                  |
| 47 | 3            | 3728.5711          | 0.0001                  |
| 48 | 1            | 3728.6153          | 0.0009                  |
| 49 | 2            | 3728.6188          | 0.0001                  |

|     |   |           |        |
|-----|---|-----------|--------|
| 50  | 1 | 3728.6384 | 0.0000 |
| 51  | 3 | 3728.6584 | 0.0000 |
| 52  | 3 | 3728.6628 | 0.0004 |
| 53  | 3 | 3728.6744 | 0.0000 |
| 54  | 3 | 3728.6798 | 0.0001 |
| 55  | 1 | 3728.6889 | 0.0000 |
| 56  | 3 | 3728.6932 | 0.0004 |
| 57  | 1 | 3728.6943 | 0.0001 |
| 58  | 3 | 3728.7152 | 0.0027 |
| 59  | 2 | 3728.7179 | 0.0002 |
| 60  | 3 | 3728.7291 | 0.0005 |
| 61  | 3 | 3728.7381 | 0.0006 |
| 62  | 3 | 3728.7413 | 0.0002 |
| 63  | 2 | 3728.7492 | 0.0010 |
| 64  | 1 | 3728.7545 | 0.0000 |
| 65  | 2 | 3728.7628 | 0.0002 |
| 66  | 3 | 3728.7693 | 0.0004 |
| 67  | 3 | 3728.7909 | 0.0004 |
| 68  | 3 | 3728.8040 | 0.0134 |
| 69  | 1 | 3728.8111 | 0.0015 |
| 70  | 2 | 3728.8184 | 0.0000 |
| 71  | 3 | 3728.8375 | 0.0000 |
| 72  | 3 | 3728.8444 | 0.0009 |
| 73  | 3 | 3728.8457 | 0.0007 |
| 74  | 2 | 3728.8598 | 0.0019 |
| 75  | 3 | 3728.8604 | 0.0000 |
| 76  | 3 | 3728.8686 | 0.0000 |
| 77  | 1 | 3728.8812 | 0.0000 |
| 78  | 3 | 3728.8857 | 0.0005 |
| 79  | 1 | 3728.8874 | 0.0005 |
| 80  | 1 | 3728.8896 | 0.0000 |
| 81  | 3 | 3728.9143 | 0.0000 |
| 82  | 3 | 3728.9256 | 0.0030 |
| 83  | 1 | 3728.9259 | 0.0005 |
| 84  | 3 | 3728.9280 | 0.0005 |
| 85  | 3 | 3728.9319 | 0.0000 |
| 86  | 2 | 3728.9362 | 0.0008 |
| 87  | 3 | 3728.9539 | 0.0038 |
| 88  | 3 | 3728.9561 | 0.0001 |
| 89  | 2 | 3728.9628 | 0.0024 |
| 90  | 1 | 3728.9821 | 0.0000 |
| 91  | 3 | 3728.9961 | 0.0015 |
| 92  | 3 | 3729.0043 | 0.0000 |
| 93  | 2 | 3729.0187 | 0.0001 |
| 94  | 1 | 3729.0306 | 0.0000 |
| 95  | 3 | 3729.0348 | 0.0001 |
| 96  | 3 | 3729.0351 | 0.0015 |
| 97  | 3 | 3729.0465 | 0.0016 |
| 98  | 2 | 3729.0561 | 0.0011 |
| 99  | 3 | 3729.0570 | 0.0078 |
| 100 | 3 | 3729.0628 | 0.0000 |
| 101 | 1 | 3729.0700 | 0.0055 |
| 102 | 3 | 3729.0718 | 0.0060 |
| 103 | 2 | 3729.0920 | 0.0016 |
| 104 | 3 | 3729.0951 | 0.0006 |
| 105 | 1 | 3729.1001 | 0.0053 |
| 106 | 3 | 3729.1069 | 0.0000 |
| 107 | 3 | 3729.1181 | 0.0002 |
| 108 | 3 | 3729.1249 | 0.0005 |
| 109 | 3 | 3729.1343 | 0.0001 |
| 110 | 2 | 3729.1446 | 0.0000 |
| 111 | 3 | 3729.1481 | 0.0000 |
| 112 | 2 | 3729.1533 | 0.0002 |
| 113 | 3 | 3729.1605 | 0.0001 |
| 114 | 1 | 3729.1640 | 0.0000 |
| 115 | 3 | 3729.1792 | 0.0000 |
| 116 | 2 | 3729.1887 | 0.0002 |
| 117 | 3 | 3729.1996 | 0.0001 |
| 118 | 3 | 3729.2019 | 0.0016 |
| 119 | 3 | 3729.2235 | 0.0081 |
| 120 | 3 | 3729.2317 | 0.0001 |
| 121 | 2 | 3729.2340 | 0.0001 |
| 122 | 3 | 3729.2427 | 0.0000 |
| 123 | 2 | 3729.2513 | 0.0000 |
| 124 | 3 | 3729.2520 | 0.0002 |
| 125 | 3 | 3729.2555 | 0.0003 |
| 126 | 3 | 3729.2672 | 0.0004 |
| 127 | 3 | 3729.2737 | 0.0015 |
| 128 | 2 | 3729.2768 | 0.0003 |
| 129 | 1 | 3729.2779 | 0.0000 |
| 130 | 3 | 3729.2975 | 0.0001 |
| 131 | 1 | 3729.3020 | 0.0006 |
| 132 | 3 | 3729.3131 | 0.0025 |
| 133 | 3 | 3729.3143 | 0.0001 |
| 134 | 2 | 3729.3174 | 0.0004 |
| 135 | 3 | 3729.3241 | 0.0010 |
| 136 | 1 | 3729.3347 | 0.0000 |

|     |   |           |        |
|-----|---|-----------|--------|
| 137 | 2 | 3729.3416 | 0.0011 |
| 138 | 3 | 3729.3488 | 0.0000 |
| 139 | 3 | 3729.3573 | 0.0011 |
| 140 | 3 | 3729.3693 | 0.0000 |
| 141 | 3 | 3729.3875 | 0.0000 |
| 142 | 2 | 3729.3921 | 0.0000 |
| 143 | 3 | 3729.3926 | 0.0000 |
| 144 | 3 | 3729.3951 | 0.0002 |
| 145 | 1 | 3729.3972 | 0.0000 |
| 146 | 1 | 3729.3993 | 0.0001 |
| 147 | 1 | 3729.4051 | 0.0000 |
| 148 | 3 | 3729.4223 | 0.0001 |
| 149 | 3 | 3729.4314 | 0.0003 |
| 150 | 3 | 3729.4341 | 0.0009 |
| 151 | 2 | 3729.4513 | 0.0004 |
| 152 | 1 | 3729.4534 | 0.0072 |
| 153 | 3 | 3729.4579 | 0.0004 |
| 154 | 1 | 3729.4650 | 0.0000 |
| 155 | 3 | 3729.4808 | 0.0001 |
| 156 | 3 | 3729.4859 | 0.0042 |
| 157 | 2 | 3729.4861 | 0.0008 |
| 158 | 2 | 3729.5006 | 0.0001 |
| 159 | 1 | 3729.5008 | 0.0000 |
| 160 | 3 | 3729.5049 | 0.0001 |
| 161 | 3 | 3729.5091 | 0.0000 |
| 162 | 2 | 3729.5146 | 0.0001 |
| 163 | 3 | 3729.5152 | 0.0006 |
| 164 | 3 | 3729.5181 | 0.0000 |
| 165 | 3 | 3729.5387 | 0.0002 |
| 166 | 3 | 3729.5390 | 0.0055 |
| 167 | 1 | 3729.5511 | 0.0001 |
| 168 | 3 | 3729.5530 | 0.0000 |
| 169 | 2 | 3729.5559 | 0.0001 |
| 170 | 3 | 3729.5565 | 0.0001 |
| 171 | 1 | 3729.5573 | 0.0000 |
| 172 | 3 | 3729.5626 | 0.0007 |
| 173 | 3 | 3729.5811 | 0.0005 |
| 174 | 3 | 3729.5873 | 0.0000 |
| 175 | 3 | 3729.5889 | 0.0001 |
| 176 | 2 | 3729.5920 | 0.0003 |
| 177 | 3 | 3729.6028 | 0.0011 |
| 178 | 2 | 3729.6134 | 0.0000 |
| 179 | 1 | 3729.6163 | 0.0000 |
| 180 | 1 | 3729.6167 | 0.0000 |
| 181 | 3 | 3729.6214 | 0.0000 |
| 182 | 3 | 3729.6242 | 0.0016 |
| 183 | 3 | 3729.6332 | 0.0003 |
| 184 | 5 | 3729.6350 | 0.0002 |
| 185 | 1 | 3729.6425 | 0.0000 |
| 186 | 3 | 3729.6486 | 0.0002 |
| 187 | 3 | 3729.6503 | 0.0002 |
| 188 | 1 | 3729.6716 | 0.0000 |
| 189 | 1 | 3729.6823 | 0.0000 |
| 190 | 3 | 3729.6868 | 0.0007 |
| 191 | 1 | 3729.6907 | 0.0000 |
| 192 | 3 | 3729.6916 | 0.0000 |
| 193 | 3 | 3729.6947 | 0.0005 |
| 194 | 2 | 3729.6965 | 0.0000 |
| 195 | 3 | 3729.7057 | 0.0001 |
| 196 | 3 | 3729.7156 | 0.0001 |
| 197 | 3 | 3729.7187 | 0.0010 |
| 198 | 1 | 3729.7218 | 0.0000 |
| 199 | 3 | 3729.7263 | 0.0001 |
| 200 | 3 | 3729.7365 | 0.0004 |
| 201 | 2 | 3729.7389 | 0.0003 |
| 202 | 3 | 3729.7488 | 0.0004 |
| 203 | 3 | 3729.7567 | 0.0001 |
| 204 | 2 | 3729.7593 | 0.0000 |
| 205 | 3 | 3729.7691 | 0.0005 |
| 206 | 1 | 3729.7719 | 0.0000 |
| 207 | 3 | 3729.7743 | 0.0003 |
| 208 | 3 | 3729.7881 | 0.0001 |
| 209 | 2 | 3729.7964 | 0.0001 |
| 210 | 3 | 3729.7967 | 0.0000 |
| 211 | 3 | 3729.8083 | 0.0007 |
| 212 | 3 | 3729.8091 | 0.0002 |
| 213 | 1 | 3729.8130 | 0.0000 |
| 214 | 2 | 3729.8176 | 0.0002 |
| 215 | 6 | 3729.8180 | 0.0001 |
| 216 | 2 | 3729.8224 | 0.0000 |
| 217 | 3 | 3729.8303 | 0.0001 |
| 218 | 3 | 3729.8386 | 0.0017 |
| 219 | 3 | 3729.8421 | 0.0000 |
| 220 | 3 | 3729.8507 | 0.0018 |
| 221 | 1 | 3729.8538 | 0.0071 |
| 222 | 3 | 3729.8564 | 0.0004 |
| 223 | 1 | 3729.8610 | 0.0000 |

|     |   |           |        |
|-----|---|-----------|--------|
| 224 | 3 | 3729.8753 | 0.0000 |
| 225 | 2 | 3729.8814 | 0.0001 |
| 226 | 3 | 3729.8866 | 0.0000 |
| 227 | 3 | 3729.8930 | 0.0001 |
| 228 | 3 | 3729.8983 | 0.0005 |
| 229 | 1 | 3729.9131 | 0.0003 |
| 230 | 3 | 3729.9175 | 0.0000 |
| 231 | 3 | 3729.9270 | 0.0002 |
| 232 | 3 | 3729.9281 | 0.0010 |
| 233 | 2 | 3729.9317 | 0.0000 |
| 234 | 2 | 3729.9447 | 0.0001 |
| 235 | 1 | 3729.9504 | 0.0000 |
| 236 | 1 | 3729.9529 | 0.0014 |
| 237 | 1 | 3729.9533 | 0.0000 |
| 238 | 5 | 3729.9588 | 0.0002 |
| 239 | 3 | 3729.9681 | 0.0001 |
| 240 | 3 | 3729.9799 | 0.0014 |
| 241 | 2 | 3729.9858 | 0.0001 |
| 242 | 1 | 3729.9894 | 0.0000 |
| 243 | 3 | 3729.9962 | 0.0000 |
| 244 | 2 | 3730.0100 | 0.0001 |
| 245 | 3 | 3730.0266 | 0.0012 |
| 246 | 1 | 3730.0307 | 0.0052 |
| 247 | 3 | 3730.0374 | 0.0005 |
| 248 | 2 | 3730.0416 | 0.0000 |
| 249 | 3 | 3730.0481 | 0.0002 |
| 250 | 3 | 3730.0484 | 0.0000 |
| 251 | 3 | 3730.0543 | 0.0001 |
| 252 | 2 | 3730.0715 | 0.0000 |
| 253 | 3 | 3730.0720 | 0.0022 |
| 254 | 3 | 3730.0906 | 0.0000 |
| 255 | 3 | 3730.0933 | 0.0004 |
| 256 | 2 | 3730.0952 | 0.0000 |
| 257 | 1 | 3730.0958 | 0.0001 |
| 258 | 3 | 3730.0974 | 0.0000 |
| 259 | 1 | 3730.1026 | 0.0000 |
| 260 | 1 | 3730.1071 | 0.0000 |
| 261 | 3 | 3730.1073 | 0.0002 |
| 262 | 3 | 3730.1095 | 0.0000 |
| 263 | 3 | 3730.1154 | 0.0007 |
| 264 | 1 | 3730.1177 | 0.0000 |
| 265 | 2 | 3730.1310 | 0.0001 |
| 266 | 1 | 3730.1326 | 0.0036 |
| 267 | 3 | 3730.1348 | 0.0003 |
| 268 | 3 | 3730.1378 | 0.0001 |
| 269 | 1 | 3730.1435 | 0.0000 |
| 270 | 3 | 3730.1484 | 0.0010 |
| 271 | 3 | 3730.1594 | 0.0001 |
| 272 | 2 | 3730.1633 | 0.0005 |
| 273 | 3 | 3730.1636 | 0.0001 |
| 274 | 2 | 3730.1654 | 0.0001 |
| 275 | 3 | 3730.1798 | 0.0005 |
| 276 | 3 | 3730.1822 | 0.0003 |
| 277 | 3 | 3730.1895 | 0.0001 |
| 278 | 3 | 3730.2007 | 0.0002 |
| 279 | 3 | 3730.2043 | 0.0000 |
| 280 | 2 | 3730.2076 | 0.0000 |
| 281 | 1 | 3730.2187 | 0.0001 |
| 282 | 3 | 3730.2195 | 0.0000 |
| 283 | 3 | 3730.2211 | 0.0006 |
| 284 | 1 | 3730.2474 | 0.0000 |
| 285 | 3 | 3730.2483 | 0.0005 |
| 286 | 2 | 3730.2486 | 0.0000 |
| 287 | 3 | 3730.2512 | 0.0003 |
| 288 | 3 | 3730.2624 | 0.0001 |
| 289 | 3 | 3730.2689 | 0.0012 |
| 290 | 1 | 3730.2693 | 0.0023 |
| 291 | 3 | 3730.2747 | 0.0001 |
| 292 | 3 | 3730.2802 | 0.0000 |
| 293 | 2 | 3730.2838 | 0.0000 |
| 294 | 3 | 3730.2945 | 0.0007 |
| 295 | 3 | 3730.3047 | 0.0001 |
| 296 | 1 | 3730.3059 | 0.0000 |
| 297 | 2 | 3730.3108 | 0.0001 |
| 298 | 3 | 3730.3166 | 0.0001 |
| 299 | 3 | 3730.3177 | 0.0015 |
| 300 | 3 | 3730.3225 | 0.0004 |
| 301 | 2 | 3730.3290 | 0.0000 |
| 302 | 1 | 3730.3373 | 0.0000 |
| 303 | 3 | 3730.3384 | 0.0002 |
| 304 | 3 | 3730.3406 | 0.0001 |
| 305 | 1 | 3730.3424 | 0.0001 |
| 306 | 3 | 3730.3499 | 0.0000 |
| 307 | 2 | 3730.3502 | 0.0001 |
| 308 | 3 | 3730.3552 | 0.0002 |
| 309 | 3 | 3730.3558 | 0.0001 |
| 310 | 1 | 3730.3667 | 0.0000 |

|     |   |           |        |
|-----|---|-----------|--------|
| 311 | 3 | 3730.3737 | 0.0001 |
| 312 | 3 | 3730.3883 | 0.0003 |
| 313 | 2 | 3730.3905 | 0.0001 |
| 314 | 1 | 3730.3949 | 0.0000 |
| 315 | 2 | 3730.3975 | 0.0001 |
| 316 | 3 | 3730.4056 | 0.0002 |
| 317 | 3 | 3730.4116 | 0.0000 |
| 318 | 3 | 3730.4225 | 0.0003 |
| 319 | 1 | 3730.4229 | 0.0001 |
| 320 | 2 | 3730.4233 | 0.0000 |
| 321 | 3 | 3730.4283 | 0.0001 |
| 322 | 3 | 3730.4366 | 0.0004 |
| 323 | 3 | 3730.4497 | 0.0003 |
| 324 | 2 | 3730.4506 | 0.0000 |
| 325 | 3 | 3730.4606 | 0.0000 |
| 326 | 1 | 3730.4637 | 0.0000 |
| 327 | 3 | 3730.4639 | 0.0001 |
| 328 | 1 | 3730.4680 | 0.0016 |
| 329 | 3 | 3730.4727 | 0.0009 |
| 330 | 3 | 3730.4819 | 0.0000 |
| 331 | 3 | 3730.4875 | 0.0002 |
| 332 | 3 | 3730.4902 | 0.0003 |
| 333 | 3 | 3730.5026 | 0.0001 |
| 334 | 2 | 3730.5054 | 0.0001 |
| 335 | 2 | 3730.5099 | 0.0000 |
| 336 | 3 | 3730.5210 | 0.0000 |
| 337 | 3 | 3730.5221 | 0.0014 |
| 338 | 2 | 3730.5297 | 0.0001 |
| 339 | 3 | 3730.5378 | 0.0001 |
| 340 | 1 | 3730.5428 | 0.0003 |
| 341 | 3 | 3730.5511 | 0.0001 |
| 342 | 3 | 3730.5518 | 0.0002 |
| 343 | 1 | 3730.5574 | 0.0000 |
| 344 | 3 | 3730.5590 | 0.0002 |
| 345 | 1 | 3730.5639 | 0.0002 |
| 346 | 3 | 3730.5689 | 0.0002 |
| 347 | 2 | 3730.5702 | 0.0000 |
| 348 | 3 | 3730.5792 | 0.0000 |
| 349 | 3 | 3730.5838 | 0.0001 |
| 350 | 3 | 3730.5840 | 0.0000 |
| 351 | 3 | 3730.5858 | 0.0001 |
| 352 | 2 | 3730.5925 | 0.0001 |
| 353 | 1 | 3730.5943 | 0.0000 |
| 354 | 2 | 3730.5998 | 0.0000 |
| 355 | 3 | 3730.6047 | 0.0002 |
| 356 | 3 | 3730.6106 | 0.0007 |
| 357 | 3 | 3730.6241 | 0.0001 |
| 358 | 3 | 3730.6308 | 0.0001 |
| 359 | 2 | 3730.6338 | 0.0001 |
| 360 | 1 | 3730.6396 | 0.0008 |
| 361 | 1 | 3730.6458 | 0.0000 |
| 362 | 3 | 3730.6549 | 0.0000 |
| 363 | 2 | 3730.6618 | 0.0000 |
| 364 | 3 | 3730.6623 | 0.0000 |
| 365 | 3 | 3730.6672 | 0.0000 |
| 366 | 1 | 3730.6679 | 0.0000 |
| 367 | 1 | 3730.6694 | 0.0000 |
| 368 | 3 | 3730.6743 | 0.0002 |
| 369 | 2 | 3730.6789 | 0.0000 |
| 370 | 1 | 3730.6938 | 0.0000 |
| 371 | 3 | 3730.6972 | 0.0000 |
| 372 | 3 | 3730.7006 | 0.0000 |
| 373 | 3 | 3730.7074 | 0.0000 |
| 374 | 3 | 3730.7129 | 0.0000 |
| 375 | 2 | 3730.7175 | 0.0000 |
| 376 | 3 | 3730.7199 | 0.0000 |
| 377 | 1 | 3730.7215 | 0.0000 |
| 378 | 3 | 3730.7241 | 0.0000 |
| 379 | 3 | 3730.7256 | 0.0000 |
| 380 | 3 | 3730.7379 | 0.0003 |
| 381 | 3 | 3730.7417 | 0.0001 |
| 382 | 2 | 3730.7527 | 0.0000 |
| 383 | 3 | 3730.7528 | 0.0000 |
| 384 | 1 | 3730.7545 | 0.0002 |
| 385 | 3 | 3730.7594 | 0.0000 |
| 386 | 2 | 3730.7605 | 0.0001 |
| 387 | 1 | 3730.7665 | 0.0000 |
| 388 | 3 | 3730.7735 | 0.0001 |
| 389 | 2 | 3730.7740 | 0.0000 |
| 390 | 3 | 3730.7800 | 0.0000 |
| 391 | 3 | 3730.8010 | 0.0002 |
| 392 | 3 | 3730.8044 | 0.0000 |
| 393 | 3 | 3730.8183 | 0.0000 |
| 394 | 2 | 3730.8192 | 0.0000 |
| 395 | 3 | 3730.8261 | 0.0005 |
| 396 | 3 | 3730.8410 | 0.0002 |
| 397 | 4 | 3730.8459 | 0.0000 |

|     |   |           |        |
|-----|---|-----------|--------|
| 398 | 1 | 3730.8469 | 0.0006 |
| 399 | 2 | 3730.8566 | 0.0000 |
| 400 | 2 | 3730.8692 | 0.0000 |
| 401 | 3 | 3730.8696 | 0.0007 |
| 402 | 3 | 3730.8702 | 0.0000 |
| 403 | 3 | 3730.8724 | 0.0000 |
| 404 | 2 | 3730.8942 | 0.0000 |
| 405 | 3 | 3730.8948 | 0.0001 |
| 406 | 3 | 3730.8949 | 0.0000 |
| 407 | 1 | 3730.8981 | 0.0000 |
| 408 | 3 | 3730.9173 | 0.0001 |
| 409 | 3 | 3730.9191 | 0.0000 |
| 410 | 1 | 3730.9239 | 0.0000 |
| 411 | 3 | 3730.9297 | 0.0008 |
| 412 | 1 | 3730.9344 | 0.0003 |
| 413 | 3 | 3730.9396 | 0.0000 |
| 414 | 1 | 3730.9420 | 0.0000 |
| 415 | 2 | 3730.9454 | 0.0000 |
| 416 | 2 | 3730.9496 | 0.0001 |
| 417 | 3 | 3730.9570 | 0.0002 |
| 418 | 1 | 3730.9580 | 0.0000 |
| 419 | 3 | 3730.9597 | 0.0002 |
| 420 | 3 | 3730.9668 | 0.0000 |
| 421 | 3 | 3730.9899 | 0.0000 |
| 422 | 2 | 3731.0035 | 0.0001 |
| 423 | 3 | 3731.0057 | 0.0000 |
| 424 | 3 | 3731.0117 | 0.0000 |
| 425 | 3 | 3731.0276 | 0.0007 |
| 426 | 2 | 3731.0293 | 0.0000 |
| 427 | 1 | 3731.0331 | 0.0002 |
| 428 | 3 | 3731.0343 | 0.0000 |
| 429 | 3 | 3731.0372 | 0.0000 |
| 430 | 3 | 3731.0391 | 0.0000 |
| 431 | 1 | 3731.0414 | 0.0000 |
| 432 | 3 | 3731.0472 | 0.0001 |
| 433 | 1 | 3731.0558 | 0.0000 |
| 434 | 2 | 3731.0716 | 0.0002 |
| 435 | 3 | 3731.0728 | 0.0000 |
| 436 | 3 | 3731.0818 | 0.0002 |
| 437 | 3 | 3731.0909 | 0.0006 |
| 438 | 3 | 3731.0979 | 0.0004 |
| 439 | 2 | 3731.1021 | 0.0001 |
| 440 | 3 | 3731.1120 | 0.0002 |
| 441 | 3 | 3731.1145 | 0.0000 |
| 442 | 2 | 3731.1165 | 0.0001 |
| 443 | 3 | 3731.1246 | 0.0000 |
| 444 | 3 | 3731.1309 | 0.0002 |
| 445 | 3 | 3731.1311 | 0.0000 |
| 446 | 1 | 3731.1461 | 0.0011 |
| 447 | 3 | 3731.1492 | 0.0001 |
| 448 | 1 | 3731.1540 | 0.0000 |
| 449 | 3 | 3731.1746 | 0.0000 |
| 450 | 3 | 3731.1749 | 0.0000 |
| 451 | 2 | 3731.1865 | 0.0001 |
| 452 | 3 | 3731.1893 | 0.0000 |
| 453 | 3 | 3731.1970 | 0.0000 |
| 454 | 3 | 3731.2187 | 0.0000 |
| 455 | 2 | 3731.2218 | 0.0000 |
| 456 | 1 | 3731.2239 | 0.0000 |
| 457 | 3 | 3731.2256 | 0.0000 |
| 458 | 3 | 3731.2311 | 0.0002 |
| 459 | 1 | 3731.2379 | 0.0000 |
| 460 | 2 | 3731.2392 | 0.0001 |
| 461 | 3 | 3731.2418 | 0.0001 |
| 462 | 3 | 3731.2485 | 0.0001 |
| 463 | 1 | 3731.2597 | 0.0000 |
| 464 | 3 | 3731.2689 | 0.0000 |
| 465 | 3 | 3731.2743 | 0.0001 |
| 466 | 3 | 3731.2832 | 0.0002 |
| 467 | 2 | 3731.2840 | 0.0000 |
| 468 | 1 | 3731.2978 | 0.0000 |
| 469 | 3 | 3731.3000 | 0.0000 |
| 470 | 3 | 3731.3044 | 0.0004 |
| 471 | 3 | 3731.3148 | 0.0000 |
| 472 | 1 | 3731.3238 | 0.0001 |
| 473 | 3 | 3731.3306 | 0.0000 |
| 474 | 1 | 3731.3364 | 0.0001 |
| 475 | 2 | 3731.3624 | 0.0000 |
| 476 | 3 | 3731.3636 | 0.0001 |
| 477 | 3 | 3731.3689 | 0.0000 |
| 478 | 2 | 3731.3799 | 0.0000 |
| 479 | 3 | 3731.3839 | 0.0000 |
| 480 | 3 | 3731.3885 | 0.0000 |
| 481 | 3 | 3731.4009 | 0.0000 |
| 482 | 3 | 3731.4012 | 0.0000 |
| 483 | 1 | 3731.4026 | 0.0000 |
| 484 | 1 | 3731.4119 | 0.0000 |

|     |   |           |        |
|-----|---|-----------|--------|
| 485 | 3 | 3731.4281 | 0.0001 |
| 486 | 3 | 3731.4323 | 0.0000 |
| 487 | 2 | 3731.4360 | 0.0001 |
| 488 | 3 | 3731.4430 | 0.0000 |
| 489 | 1 | 3731.4496 | 0.0000 |
| 490 | 2 | 3731.4542 | 0.0000 |
| 491 | 3 | 3731.4552 | 0.0001 |
| 492 | 3 | 3731.4694 | 0.0000 |
| 493 | 3 | 3731.4718 | 0.0000 |
| 494 | 1 | 3731.4736 | 0.0000 |
| 495 | 2 | 3731.4843 | 0.0000 |
| 496 | 2 | 3731.5005 | 0.0000 |
| 497 | 3 | 3731.5027 | 0.0000 |
| 498 | 3 | 3731.5233 | 0.0003 |
| 499 | 3 | 3731.5244 | 0.0000 |
| 500 | 2 | 3731.5318 | 0.0000 |
| 501 | 3 | 3731.5545 | 0.0000 |
| 502 | 3 | 3731.5871 | 0.0000 |
| 503 | 1 | 3731.5888 | 0.0002 |
| 504 | 3 | 3731.5908 | 0.0000 |
| 505 | 1 | 3731.5983 | 0.0000 |
| 506 | 3 | 3731.6080 | 0.0000 |
| 507 | 2 | 3731.6089 | 0.0000 |
| 508 | 3 | 3731.6126 | 0.0001 |
| 509 | 3 | 3731.6252 | 0.0000 |
| 510 | 1 | 3731.6317 | 0.0000 |
| 511 | 3 | 3731.6824 | 0.0000 |
| 512 | 2 | 3731.6870 | 0.0000 |
| 513 | 3 | 3731.6899 | 0.0000 |
| 514 | 3 | 3731.7125 | 0.0001 |
| 515 | 3 | 3731.7183 | 0.0000 |
| 516 | 3 | 3731.7313 | 0.0000 |
| 517 | 3 | 3731.7403 | 0.0002 |
| 518 | 3 | 3731.7452 | 0.0002 |
| 519 | 2 | 3731.7580 | 0.0001 |
| 520 | 1 | 3731.7623 | 0.0006 |
| 521 | 1 | 3731.7691 | 0.0000 |
| 522 | 3 | 3731.7715 | 0.0000 |
| 523 | 3 | 3731.7928 | 0.0000 |
| 524 | 1 | 3731.7946 | 0.0000 |
| 525 | 3 | 3731.8197 | 0.0000 |
| 526 | 3 | 3731.8288 | 0.0001 |
| 527 | 1 | 3731.8414 | 0.0000 |
| 528 | 2 | 3731.8427 | 0.0000 |
| 529 | 3 | 3731.8537 | 0.0000 |
| 530 | 2 | 3731.8595 | 0.0000 |
| 531 | 3 | 3731.8820 | 0.0001 |
| 532 | 3 | 3731.9094 | 0.0000 |
| 533 | 2 | 3731.9168 | 0.0000 |
| 534 | 3 | 3731.9289 | 0.0000 |
| 535 | 2 | 3731.9813 | 0.0000 |
| 536 | 3 | 3732.0008 | 0.0000 |
| 537 | 3 | 3732.0125 | 0.0000 |
| 538 | 3 | 3732.0362 | 0.0000 |
| 539 | 3 | 3732.0498 | 0.0001 |
| 540 | 1 | 3732.0582 | 0.0002 |
| 541 | 3 | 3732.0784 | 0.0000 |
| 542 | 3 | 3732.1496 | 0.0001 |
| 543 | 3 | 3732.1535 | 0.0000 |
| 544 | 1 | 3732.1778 | 0.0000 |
| 545 | 2 | 3732.1855 | 0.0000 |
| 546 | 3 | 3732.2099 | 0.0002 |
| 547 | 2 | 3732.2202 | 0.0000 |
| 548 | 3 | 3732.2603 | 0.0000 |
| 549 | 3 | 3732.2664 | 0.0000 |
| 550 | 1 | 3732.2999 | 0.0000 |
| 551 | 1 | 3732.3050 | 0.0000 |
| 552 | 3 | 3732.3057 | 0.0000 |
| 553 | 3 | 3732.3238 | 0.0000 |
| 554 | 3 | 3732.3240 | 0.0002 |
| 555 | 2 | 3732.3357 | 0.0000 |
| 556 | 3 | 3732.3510 | 0.0000 |
| 557 | 1 | 3732.3556 | 0.0000 |
| 558 | 3 | 3732.3589 | 0.0001 |
| 559 | 3 | 3732.3886 | 0.0000 |
| 560 | 2 | 3732.4045 | 0.0000 |
| 561 | 3 | 3732.4160 | 0.0000 |
| 562 | 3 | 3732.4212 | 0.0000 |
| 563 | 3 | 3732.4283 | 0.0001 |
| 564 | 1 | 3732.4374 | 0.0000 |
| 565 | 2 | 3732.4902 | 0.0000 |
| 566 | 1 | 3732.5411 | 0.0003 |
| 567 | 1 | 3732.5815 | 0.0000 |
| 568 | 3 | 3732.5835 | 0.0000 |
| 569 | 2 | 3732.5989 | 0.0000 |
| 570 | 3 | 3732.6011 | 0.0000 |
| 571 | 3 | 3732.6320 | 0.0000 |



|     |   |           |        |
|-----|---|-----------|--------|
| 572 | 3 | 3732.6422 | 0.0000 |
| 573 | 2 | 3732.6500 | 0.0000 |
| 574 | 3 | 3732.6797 | 0.0000 |
| 575 | 3 | 3732.6904 | 0.0000 |
| 576 | 3 | 3732.7143 | 0.0000 |
| 577 | 2 | 3732.7470 | 0.0000 |
| 578 | 3 | 3732.7625 | 0.0000 |
| 579 | 3 | 3732.8072 | 0.0000 |
| 580 | 3 | 3732.8094 | 0.0000 |
| 581 | 1 | 3732.8376 | 0.0000 |
| 582 | 1 | 3733.7130 | 0.0000 |
| 583 | 2 | 3733.7912 | 0.0000 |
| 584 | 3 | 3733.7914 | 0.0001 |
| 585 | 3 | 3733.8046 | 0.0000 |
| 586 | 3 | 3733.8823 | 0.0000 |
| 587 | 3 | 3733.9313 | 0.0004 |
| 588 | 2 | 3733.9637 | 0.0000 |
| 589 | 3 | 3733.9932 | 0.0000 |
| 590 | 3 | 3734.0488 | 0.0000 |
| 591 | 2 | 3734.0974 | 0.0000 |
| 592 | 3 | 3734.1214 | 0.0000 |
| 593 | 1 | 3734.1233 | 0.0002 |
| 594 | 3 | 3734.2153 | 0.0000 |
| 595 | 2 | 3734.2495 | 0.0000 |
| 596 | 3 | 3734.2680 | 0.0000 |
| 597 | 3 | 3734.4112 | 0.0000 |
| 598 | 2 | 3734.4522 | 0.0000 |
| 599 | 3 | 3734.4575 | 0.0001 |
| 600 | 1 | 3734.5430 | 0.0000 |
| 601 | 3 | 3734.5734 | 0.0001 |
| 602 | 1 | 3734.6119 | 0.0003 |
| 603 | 3 | 3734.6379 | 0.0002 |
| 604 | 3 | 3734.6965 | 0.0001 |

**Table S4** Numerical values for the multiplet energy levels, degeneracies and oscillator strength calculated for the  $4d^{10}5f^2 \rightarrow 4d^95f^3$  transitions of  $U^{4+}$  in  $UO_2$  represented graphically in the upper panel of Figure 6.

| #  | Multiplicity | Energy levels [eV] | Oscillator strength [-] |
|----|--------------|--------------------|-------------------------|
| 1  | 3            | 733.6088           | 0.0000                  |
| 2  | 1            | 733.6167           | 0.0011                  |
| 3  | 2            | 733.6514           | 0.0000                  |
| 4  | 3            | 733.6535           | 0.0006                  |
| 5  | 3            | 733.6642           | 0.0000                  |
| 6  | 1            | 733.7270           | 0.0000                  |
| 7  | 3            | 733.7272           | 0.0000                  |
| 8  | 3            | 733.7694           | 0.0038                  |
| 9  | 2            | 733.7753           | 0.0001                  |
| 10 | 3            | 733.8135           | 0.0003                  |
| 11 | 2            | 733.8591           | 0.0005                  |
| 12 | 3            | 733.8622           | 0.0011                  |
| 13 | 3            | 733.8930           | 0.0000                  |
| 14 | 3            | 733.9045           | 0.0002                  |
| 15 | 2            | 733.9089           | 0.0004                  |
| 16 | 3            | 733.9282           | 0.0002                  |
| 17 | 1            | 733.9410           | 0.0001                  |
| 18 | 3            | 733.9681           | 0.0000                  |
| 19 | 3            | 733.9684           | 0.0000                  |
| 20 | 1            | 733.9926           | 0.0000                  |
| 21 | 3            | 734.0227           | 0.0000                  |
| 22 | 2            | 734.0347           | 0.0008                  |
| 23 | 3            | 734.0630           | 0.0008                  |
| 24 | 3            | 734.1131           | 0.0021                  |
| 25 | 1            | 734.1510           | 0.0012                  |
| 26 | 3            | 734.2549           | 0.0019                  |
| 27 | 2            | 734.2674           | 0.0000                  |
| 28 | 3            | 734.2711           | 0.0002                  |
| 29 | 3            | 734.2801           | 0.0002                  |
| 30 | 3            | 734.3062           | 0.0001                  |
| 31 | 2            | 734.3173           | 0.0000                  |
| 32 | 1            | 734.3228           | 0.0045                  |
| 33 | 3            | 734.3307           | 0.0015                  |
| 34 | 1            | 734.3387           | 0.0000                  |
| 35 | 3            | 734.3490           | 0.0013                  |
| 36 | 3            | 734.3495           | 0.0002                  |
| 37 | 1            | 734.3617           | 0.0000                  |
| 38 | 3            | 734.3755           | 0.0059                  |
| 39 | 3            | 734.3811           | 0.0001                  |
| 40 | 2            | 734.3909           | 0.0025                  |
| 41 | 3            | 734.3917           | 0.0000                  |
| 42 | 2            | 734.4308           | 0.0001                  |
| 43 | 3            | 734.4411           | 0.0024                  |
| 44 | 3            | 734.4413           | 0.0000                  |
| 45 | 2            | 734.4521           | 0.0005                  |
| 46 | 3            | 734.4534           | 0.0005                  |

|     |   |          |        |
|-----|---|----------|--------|
| 47  | 1 | 734.4825 | 0.0003 |
| 48  | 3 | 734.4907 | 0.0005 |
| 49  | 1 | 734.5020 | 0.0000 |
| 50  | 3 | 734.5037 | 0.0004 |
| 51  | 1 | 734.5195 | 0.0001 |
| 52  | 3 | 734.5207 | 0.0000 |
| 53  | 2 | 734.5459 | 0.0000 |
| 54  | 3 | 734.5679 | 0.0007 |
| 55  | 3 | 734.5697 | 0.0009 |
| 56  | 2 | 734.5809 | 0.0011 |
| 57  | 3 | 734.5996 | 0.0010 |
| 58  | 1 | 734.6160 | 0.0000 |
| 59  | 3 | 734.6237 | 0.0006 |
| 60  | 1 | 734.6270 | 0.0004 |
| 61  | 3 | 734.6392 | 0.0015 |
| 62  | 3 | 734.6443 | 0.0001 |
| 63  | 2 | 734.6536 | 0.0003 |
| 64  | 3 | 734.6674 | 0.0020 |
| 65  | 3 | 734.6744 | 0.0015 |
| 66  | 1 | 734.6960 | 0.0000 |
| 67  | 1 | 734.7300 | 0.0000 |
| 68  | 3 | 734.7317 | 0.0027 |
| 69  | 1 | 734.7375 | 0.0002 |
| 70  | 3 | 734.7383 | 0.0002 |
| 71  | 2 | 734.7509 | 0.0009 |
| 72  | 3 | 734.7623 | 0.0027 |
| 73  | 3 | 734.7670 | 0.0002 |
| 74  | 2 | 734.7776 | 0.0005 |
| 75  | 3 | 734.7778 | 0.0067 |
| 76  | 3 | 734.7806 | 0.0005 |
| 77  | 3 | 734.8006 | 0.0001 |
| 78  | 3 | 734.8007 | 0.0005 |
| 79  | 1 | 734.8045 | 0.0000 |
| 80  | 2 | 734.8270 | 0.0038 |
| 81  | 3 | 734.8280 | 0.0002 |
| 82  | 1 | 734.8300 | 0.0013 |
| 83  | 3 | 734.8326 | 0.0020 |
| 84  | 1 | 734.8361 | 0.0000 |
| 85  | 3 | 734.8470 | 0.0000 |
| 86  | 2 | 734.8562 | 0.0002 |
| 87  | 3 | 734.8579 | 0.0001 |
| 88  | 3 | 734.8606 | 0.0006 |
| 89  | 3 | 734.8711 | 0.0001 |
| 90  | 1 | 734.8769 | 0.0000 |
| 91  | 2 | 734.8782 | 0.0012 |
| 92  | 3 | 734.8797 | 0.0013 |
| 93  | 3 | 734.8948 | 0.0182 |
| 94  | 3 | 734.9224 | 0.0000 |
| 95  | 2 | 734.9293 | 0.0021 |
| 96  | 3 | 734.9304 | 0.0001 |
| 97  | 3 | 734.9320 | 0.0012 |
| 98  | 2 | 734.9342 | 0.0007 |
| 99  | 3 | 734.9479 | 0.0003 |
| 100 | 3 | 734.9489 | 0.0001 |
| 101 | 3 | 734.9613 | 0.0001 |
| 102 | 4 | 734.9647 | 0.0003 |
| 103 | 3 | 734.9730 | 0.0001 |
| 104 | 3 | 734.9779 | 0.0000 |
| 105 | 2 | 734.9825 | 0.0017 |
| 106 | 3 | 734.9851 | 0.0006 |
| 107 | 1 | 734.9892 | 0.0000 |
| 108 | 3 | 734.9925 | 0.0019 |
| 109 | 1 | 735.0100 | 0.0001 |
| 110 | 3 | 735.0149 | 0.0019 |
| 111 | 2 | 735.0201 | 0.0009 |
| 112 | 3 | 735.0265 | 0.0063 |
| 113 | 3 | 735.0321 | 0.0074 |
| 114 | 2 | 735.0333 | 0.0024 |
| 115 | 2 | 735.0469 | 0.0000 |
| 116 | 1 | 735.0477 | 0.0000 |
| 117 | 3 | 735.0507 | 0.0000 |
| 118 | 3 | 735.0511 | 0.0003 |
| 119 | 3 | 735.0586 | 0.0045 |
| 120 | 2 | 735.0821 | 0.0066 |
| 121 | 1 | 735.0933 | 0.0012 |
| 122 | 3 | 735.0948 | 0.0035 |
| 123 | 3 | 735.1053 | 0.0023 |
| 124 | 3 | 735.1109 | 0.0000 |
| 125 | 3 | 735.1114 | 0.0016 |
| 126 | 3 | 735.1167 | 0.0004 |
| 127 | 3 | 735.1305 | 0.0045 |
| 128 | 3 | 735.1307 | 0.0014 |
| 129 | 2 | 735.1382 | 0.0004 |
| 130 | 3 | 735.1550 | 0.0066 |
| 131 | 1 | 735.1644 | 0.0000 |
| 132 | 3 | 735.1701 | 0.0064 |
| 133 | 2 | 735.1705 | 0.0019 |

|     |   |          |        |
|-----|---|----------|--------|
| 134 | 1 | 735.1851 | 0.0004 |
| 135 | 3 | 735.1966 | 0.0009 |
| 136 | 2 | 735.1982 | 0.0000 |
| 137 | 3 | 735.1985 | 0.0018 |
| 138 | 6 | 735.2027 | 0.0010 |
| 139 | 1 | 735.2149 | 0.0000 |
| 140 | 2 | 735.2179 | 0.0058 |
| 141 | 2 | 735.2248 | 0.0063 |
| 142 | 1 | 735.2317 | 0.0004 |
| 143 | 3 | 735.2344 | 0.0072 |
| 144 | 3 | 735.2446 | 0.0074 |
| 145 | 3 | 735.2464 | 0.0007 |
| 146 | 2 | 735.2521 | 0.0000 |
| 147 | 3 | 735.2594 | 0.0001 |
| 148 | 3 | 735.2719 | 0.0003 |
| 149 | 1 | 735.2785 | 0.0000 |
| 150 | 3 | 735.2790 | 0.0002 |
| 151 | 3 | 735.2959 | 0.0006 |
| 152 | 3 | 735.2964 | 0.0006 |
| 153 | 2 | 735.3002 | 0.0022 |
| 154 | 1 | 735.3066 | 0.0001 |
| 155 | 3 | 735.3129 | 0.0100 |
| 156 | 3 | 735.3157 | 0.0020 |
| 157 | 3 | 735.3191 | 0.0067 |
| 158 | 3 | 735.3282 | 0.0033 |
| 159 | 3 | 735.3305 | 0.0001 |
| 160 | 3 | 735.3369 | 0.0005 |
| 161 | 2 | 735.3388 | 0.0057 |
| 162 | 1 | 735.3415 | 0.0000 |
| 163 | 1 | 735.3486 | 0.0087 |
| 164 | 3 | 735.3516 | 0.0001 |
| 165 | 3 | 735.3539 | 0.0473 |
| 166 | 1 | 735.3582 | 0.0000 |
| 167 | 3 | 735.3655 | 0.0008 |
| 168 | 3 | 735.3664 | 0.0043 |
| 169 | 2 | 735.3679 | 0.0047 |
| 170 | 1 | 735.3727 | 0.0075 |
| 171 | 3 | 735.3743 | 0.0002 |
| 172 | 6 | 735.3862 | 0.0036 |
| 173 | 1 | 735.3992 | 0.0026 |
| 174 | 3 | 735.4122 | 0.0017 |
| 175 | 2 | 735.4127 | 0.0006 |
| 176 | 3 | 735.4143 | 0.0143 |
| 177 | 3 | 735.4183 | 0.0031 |
| 178 | 3 | 735.4241 | 0.0000 |
| 179 | 3 | 735.4291 | 0.0001 |
| 180 | 2 | 735.4311 | 0.0124 |
| 181 | 2 | 735.4413 | 0.0262 |
| 182 | 3 | 735.4527 | 0.0076 |
| 183 | 3 | 735.4618 | 0.0001 |
| 184 | 1 | 735.4632 | 0.0000 |
| 185 | 3 | 735.4649 | 0.0028 |
| 186 | 3 | 735.4702 | 0.0029 |
| 187 | 2 | 735.4725 | 0.0007 |
| 188 | 3 | 735.4775 | 0.0010 |
| 189 | 2 | 735.4811 | 0.0059 |
| 190 | 3 | 735.4910 | 0.0017 |
| 191 | 1 | 735.5009 | 0.0011 |
| 192 | 3 | 735.5013 | 0.0194 |
| 193 | 3 | 735.5025 | 0.0027 |
| 194 | 3 | 735.5039 | 0.0238 |
| 195 | 1 | 735.5094 | 0.0000 |
| 196 | 3 | 735.5101 | 0.0042 |
| 197 | 1 | 735.5136 | 0.0034 |
| 198 | 3 | 735.5244 | 0.0016 |
| 199 | 1 | 735.5343 | 0.0000 |
| 200 | 2 | 735.5369 | 0.0007 |
| 201 | 3 | 735.5377 | 0.0008 |
| 202 | 3 | 735.5413 | 0.0003 |
| 203 | 3 | 735.5421 | 0.0008 |
| 204 | 1 | 735.5590 | 0.0047 |
| 205 | 2 | 735.5591 | 0.0009 |
| 206 | 1 | 735.5658 | 0.0000 |
| 207 | 3 | 735.5677 | 0.0012 |
| 208 | 3 | 735.5697 | 0.0028 |
| 209 | 3 | 735.5828 | 0.0005 |
| 210 | 3 | 735.5830 | 0.0004 |
| 211 | 3 | 735.5904 | 0.0020 |
| 212 | 3 | 735.5916 | 0.0016 |
| 213 | 2 | 735.5947 | 0.0032 |
| 214 | 3 | 735.6018 | 0.0075 |
| 215 | 2 | 735.6057 | 0.0000 |
| 216 | 3 | 735.6117 | 0.0000 |
| 217 | 3 | 735.6146 | 0.0035 |
| 218 | 1 | 735.6164 | 0.0000 |
| 219 | 1 | 735.6273 | 0.0000 |
| 220 | 5 | 735.6403 | 0.0006 |

|     |   |          |        |
|-----|---|----------|--------|
| 221 | 3 | 735.6451 | 0.0067 |
| 222 | 3 | 735.6702 | 0.0083 |
| 223 | 2 | 735.6706 | 0.0040 |
| 224 | 3 | 735.6756 | 0.0015 |
| 225 | 3 | 735.6852 | 0.0005 |
| 226 | 1 | 735.6903 | 0.0000 |
| 227 | 1 | 735.6944 | 0.0140 |
| 228 | 3 | 735.7038 | 0.0001 |
| 229 | 3 | 735.7103 | 0.0010 |
| 230 | 2 | 735.7126 | 0.0000 |
| 231 | 3 | 735.7153 | 0.0027 |
| 232 | 3 | 735.7282 | 0.0009 |
| 233 | 2 | 735.7341 | 0.0008 |
| 234 | 3 | 735.7359 | 0.0001 |
| 235 | 3 | 735.7369 | 0.0015 |
| 236 | 1 | 735.7480 | 0.0000 |
| 237 | 2 | 735.7504 | 0.0043 |
| 238 | 3 | 735.7545 | 0.0001 |
| 239 | 3 | 735.7566 | 0.0021 |
| 240 | 2 | 735.7610 | 0.0049 |
| 241 | 3 | 735.7616 | 0.0002 |
| 242 | 1 | 735.7663 | 0.0009 |
| 243 | 3 | 735.7712 | 0.0060 |
| 244 | 3 | 735.7727 | 0.0004 |
| 245 | 2 | 735.7781 | 0.0022 |
| 246 | 3 | 735.7833 | 0.0084 |
| 247 | 1 | 735.7872 | 0.0000 |
| 248 | 3 | 735.7883 | 0.0002 |
| 249 | 1 | 735.7919 | 0.0009 |
| 250 | 2 | 735.7922 | 0.0045 |
| 251 | 3 | 735.7943 | 0.0002 |
| 252 | 3 | 735.7971 | 0.0001 |
| 253 | 1 | 735.8033 | 0.0000 |
| 254 | 3 | 735.8150 | 0.0031 |
| 255 | 3 | 735.8189 | 0.0001 |
| 256 | 3 | 735.8259 | 0.0014 |
| 257 | 1 | 735.8264 | 0.0000 |
| 258 | 2 | 735.8305 | 0.0001 |
| 259 | 3 | 735.8336 | 0.0009 |
| 260 | 3 | 735.8361 | 0.0007 |
| 261 | 2 | 735.8407 | 0.0013 |
| 262 | 1 | 735.8471 | 0.0000 |
| 263 | 3 | 735.8499 | 0.0000 |
| 264 | 3 | 735.8578 | 0.0002 |
| 265 | 3 | 735.8581 | 0.0029 |
| 266 | 2 | 735.8620 | 0.0000 |
| 267 | 1 | 735.8628 | 0.0000 |
| 268 | 3 | 735.8657 | 0.0001 |
| 269 | 3 | 735.8699 | 0.0006 |
| 270 | 3 | 735.8843 | 0.0014 |
| 271 | 3 | 735.8876 | 0.0001 |
| 272 | 2 | 735.8884 | 0.0047 |
| 273 | 3 | 735.8906 | 0.0004 |
| 274 | 3 | 735.8969 | 0.0005 |
| 275 | 2 | 735.9038 | 0.0006 |
| 276 | 3 | 735.9067 | 0.0015 |
| 277 | 3 | 735.9122 | 0.0005 |
| 278 | 2 | 735.9156 | 0.0018 |
| 279 | 3 | 735.9162 | 0.0008 |
| 280 | 2 | 735.9245 | 0.0008 |
| 281 | 1 | 735.9268 | 0.0000 |
| 282 | 3 | 735.9322 | 0.0001 |
| 283 | 3 | 735.9366 | 0.0000 |
| 284 | 3 | 735.9431 | 0.0000 |
| 285 | 1 | 735.9457 | 0.0005 |
| 286 | 3 | 735.9487 | 0.0002 |
| 287 | 2 | 735.9488 | 0.0003 |
| 288 | 3 | 735.9506 | 0.0000 |
| 289 | 3 | 735.9563 | 0.0005 |
| 290 | 1 | 735.9575 | 0.0006 |
| 291 | 2 | 735.9592 | 0.0002 |
| 292 | 3 | 735.9619 | 0.0002 |
| 293 | 3 | 735.9666 | 0.0010 |
| 294 | 3 | 735.9738 | 0.0001 |
| 295 | 1 | 735.9748 | 0.0000 |
| 296 | 3 | 735.9768 | 0.0000 |
| 297 | 1 | 735.9788 | 0.0002 |
| 298 | 3 | 735.9971 | 0.0000 |
| 299 | 2 | 735.9975 | 0.0002 |
| 300 | 3 | 736.0018 | 0.0001 |
| 301 | 3 | 736.0057 | 0.0002 |
| 302 | 3 | 736.0069 | 0.0004 |
| 303 | 3 | 736.0093 | 0.0000 |
| 304 | 2 | 736.0151 | 0.0018 |
| 305 | 3 | 736.0207 | 0.0004 |
| 306 | 3 | 736.0219 | 0.0018 |
| 307 | 3 | 736.0263 | 0.0014 |

|     |   |          |        |
|-----|---|----------|--------|
| 308 | 1 | 736.0303 | 0.0003 |
| 309 | 2 | 736.0369 | 0.0005 |
| 310 | 1 | 736.0373 | 0.0000 |
| 311 | 3 | 736.0442 | 0.0010 |
| 312 | 2 | 736.0498 | 0.0022 |
| 313 | 1 | 736.0507 | 0.0000 |
| 314 | 3 | 736.0521 | 0.0005 |
| 315 | 3 | 736.0579 | 0.0005 |
| 316 | 1 | 736.0705 | 0.0000 |
| 317 | 3 | 736.0721 | 0.0001 |
| 318 | 2 | 736.0723 | 0.0000 |
| 319 | 3 | 736.0750 | 0.0003 |
| 320 | 3 | 736.0808 | 0.0008 |
| 321 | 3 | 736.0865 | 0.0001 |
| 322 | 3 | 736.0889 | 0.0019 |
| 323 | 2 | 736.0902 | 0.0001 |
| 324 | 1 | 736.0969 | 0.0000 |
| 325 | 3 | 736.1011 | 0.0000 |
| 326 | 3 | 736.1043 | 0.0012 |
| 327 | 3 | 736.1095 | 0.0019 |
| 328 | 1 | 736.1114 | 0.0000 |
| 329 | 1 | 736.1153 | 0.0000 |
| 330 | 1 | 736.1169 | 0.0000 |
| 331 | 3 | 736.1202 | 0.0006 |
| 332 | 2 | 736.1219 | 0.0001 |
| 333 | 3 | 736.1253 | 0.0001 |
| 334 | 3 | 736.1317 | 0.0004 |
| 335 | 1 | 736.1366 | 0.0001 |
| 336 | 2 | 736.1387 | 0.0008 |
| 337 | 3 | 736.1421 | 0.0002 |
| 338 | 3 | 736.1448 | 0.0008 |
| 339 | 3 | 736.1536 | 0.0003 |
| 340 | 3 | 736.1591 | 0.0012 |
| 341 | 3 | 736.1732 | 0.0025 |
| 342 | 3 | 736.1750 | 0.0009 |
| 343 | 2 | 736.1779 | 0.0000 |
| 344 | 5 | 736.1906 | 0.0007 |
| 345 | 3 | 736.1914 | 0.0009 |
| 346 | 1 | 736.1963 | 0.0013 |
| 347 | 3 | 736.2042 | 0.0002 |
| 348 | 2 | 736.2089 | 0.0002 |
| 349 | 3 | 736.2098 | 0.0000 |
| 350 | 3 | 736.2142 | 0.0002 |
| 351 | 3 | 736.2163 | 0.0009 |
| 352 | 3 | 736.2229 | 0.0002 |
| 353 | 3 | 736.2259 | 0.0003 |
| 354 | 3 | 736.2264 | 0.0004 |
| 355 | 3 | 736.2355 | 0.0000 |
| 356 | 2 | 736.2386 | 0.0000 |
| 357 | 3 | 736.2393 | 0.0008 |
| 358 | 3 | 736.2461 | 0.0000 |
| 359 | 3 | 736.2532 | 0.0008 |
| 360 | 1 | 736.2534 | 0.0000 |
| 361 | 3 | 736.2567 | 0.0003 |
| 362 | 2 | 736.2613 | 0.0000 |
| 363 | 3 | 736.2654 | 0.0000 |
| 364 | 3 | 736.2717 | 0.0028 |
| 365 | 1 | 736.2727 | 0.0004 |
| 366 | 3 | 736.2791 | 0.0029 |
| 367 | 3 | 736.2875 | 0.0016 |
| 368 | 3 | 736.2917 | 0.0022 |
| 369 | 2 | 736.2975 | 0.0001 |
| 370 | 1 | 736.3006 | 0.0000 |
| 371 | 3 | 736.3083 | 0.0003 |
| 372 | 3 | 736.3084 | 0.0001 |
| 373 | 3 | 736.3100 | 0.0000 |
| 374 | 1 | 736.3117 | 0.0021 |
| 375 | 3 | 736.3260 | 0.0004 |
| 376 | 1 | 736.3274 | 0.0000 |
| 377 | 2 | 736.3279 | 0.0000 |
| 378 | 3 | 736.3314 | 0.0001 |
| 379 | 3 | 736.3366 | 0.0001 |
| 380 | 3 | 736.3517 | 0.0000 |
| 381 | 3 | 736.3539 | 0.0004 |
| 382 | 1 | 736.3580 | 0.0015 |
| 383 | 2 | 736.3597 | 0.0001 |
| 384 | 2 | 736.3631 | 0.0001 |
| 385 | 3 | 736.3657 | 0.0005 |
| 386 | 3 | 736.3662 | 0.0000 |
| 387 | 3 | 736.3725 | 0.0002 |
| 388 | 3 | 736.3785 | 0.0002 |
| 389 | 3 | 736.3806 | 0.0000 |
| 390 | 2 | 736.3822 | 0.0003 |
| 391 | 1 | 736.3907 | 0.0000 |
| 392 | 2 | 736.3916 | 0.0000 |
| 393 | 3 | 736.3982 | 0.0012 |
| 394 | 3 | 736.4036 | 0.0000 |

|     |   |          |        |
|-----|---|----------|--------|
| 395 | 1 | 736.4120 | 0.0043 |
| 396 | 2 | 736.4131 | 0.0002 |
| 397 | 6 | 736.4190 | 0.0036 |
| 398 | 1 | 736.4241 | 0.0000 |
| 399 | 3 | 736.4273 | 0.0005 |
| 400 | 2 | 736.4310 | 0.0006 |
| 401 | 3 | 736.4373 | 0.0006 |
| 402 | 1 | 736.4386 | 0.0000 |
| 403 | 3 | 736.4431 | 0.0007 |
| 404 | 1 | 736.4462 | 0.0001 |
| 405 | 3 | 736.4493 | 0.0015 |
| 406 | 3 | 736.4500 | 0.0002 |
| 407 | 2 | 736.4515 | 0.0006 |
| 408 | 3 | 736.4619 | 0.0000 |
| 409 | 3 | 736.4630 | 0.0002 |
| 410 | 3 | 736.4637 | 0.0001 |
| 411 | 2 | 736.4641 | 0.0006 |
| 412 | 1 | 736.4674 | 0.0001 |
| 413 | 3 | 736.4697 | 0.0012 |
| 414 | 3 | 736.4776 | 0.0000 |
| 415 | 3 | 736.4790 | 0.0006 |
| 416 | 3 | 736.4836 | 0.0000 |
| 417 | 1 | 736.4858 | 0.0015 |
| 418 | 2 | 736.4868 | 0.0003 |
| 419 | 3 | 736.4874 | 0.0004 |
| 420 | 3 | 736.4919 | 0.0007 |
| 421 | 3 | 736.5013 | 0.0005 |
| 422 | 3 | 736.5029 | 0.0000 |
| 423 | 3 | 736.5101 | 0.0001 |
| 424 | 2 | 736.5128 | 0.0001 |
| 425 | 1 | 736.5169 | 0.0000 |
| 426 | 3 | 736.5173 | 0.0000 |
| 427 | 1 | 736.5179 | 0.0000 |
| 428 | 3 | 736.5364 | 0.0000 |
| 429 | 3 | 736.5371 | 0.0001 |
| 430 | 1 | 736.5400 | 0.0000 |
| 431 | 3 | 736.5445 | 0.0000 |
| 432 | 2 | 736.5453 | 0.0001 |
| 433 | 2 | 736.5484 | 0.0005 |
| 434 | 3 | 736.5499 | 0.0006 |
| 435 | 3 | 736.5527 | 0.0001 |
| 436 | 2 | 736.5570 | 0.0000 |
| 437 | 3 | 736.5611 | 0.0002 |
| 438 | 3 | 736.5630 | 0.0000 |
| 439 | 1 | 736.5675 | 0.0000 |
| 440 | 3 | 736.5701 | 0.0000 |
| 441 | 1 | 736.5714 | 0.0011 |
| 442 | 1 | 736.5816 | 0.0004 |
| 443 | 3 | 736.5834 | 0.0000 |
| 444 | 2 | 736.5862 | 0.0000 |
| 445 | 3 | 736.5912 | 0.0003 |
| 446 | 3 | 736.5916 | 0.0000 |
| 447 | 3 | 736.5970 | 0.0002 |
| 448 | 3 | 736.6021 | 0.0001 |
| 449 | 3 | 736.6085 | 0.0001 |
| 450 | 1 | 736.6102 | 0.0000 |
| 451 | 3 | 736.6144 | 0.0003 |
| 452 | 3 | 736.6147 | 0.0001 |
| 453 | 2 | 736.6157 | 0.0000 |
| 454 | 2 | 736.6207 | 0.0006 |
| 455 | 1 | 736.6229 | 0.0005 |
| 456 | 3 | 736.6255 | 0.0000 |
| 457 | 3 | 736.6290 | 0.0000 |
| 458 | 3 | 736.6330 | 0.0000 |
| 459 | 2 | 736.6387 | 0.0002 |
| 460 | 3 | 736.6454 | 0.0001 |
| 461 | 1 | 736.6476 | 0.0000 |
| 462 | 3 | 736.6578 | 0.0003 |
| 463 | 2 | 736.6591 | 0.0000 |
| 464 | 3 | 736.6595 | 0.0007 |
| 465 | 1 | 736.6635 | 0.0000 |
| 466 | 3 | 736.6757 | 0.0001 |
| 467 | 2 | 736.6847 | 0.0000 |
| 468 | 2 | 736.6860 | 0.0000 |
| 469 | 3 | 736.6865 | 0.0000 |
| 470 | 3 | 736.6900 | 0.0001 |
| 471 | 3 | 736.6915 | 0.0001 |
| 472 | 1 | 736.7102 | 0.0000 |
| 473 | 3 | 736.7131 | 0.0001 |
| 474 | 3 | 736.7144 | 0.0000 |
| 475 | 1 | 736.7181 | 0.0001 |
| 476 | 3 | 736.7200 | 0.0002 |
| 477 | 2 | 736.7214 | 0.0001 |
| 478 | 3 | 736.7261 | 0.0002 |
| 479 | 2 | 736.7327 | 0.0001 |
| 480 | 3 | 736.7386 | 0.0000 |
| 481 | 3 | 736.7394 | 0.0013 |

|     |   |          |        |
|-----|---|----------|--------|
| 482 | 3 | 736.7416 | 0.0001 |
| 483 | 3 | 736.7458 | 0.0009 |
| 484 | 1 | 736.7487 | 0.0003 |
| 485 | 2 | 736.7497 | 0.0002 |
| 486 | 3 | 736.7500 | 0.0005 |
| 487 | 3 | 736.7543 | 0.0000 |
| 488 | 3 | 736.7596 | 0.0019 |
| 489 | 1 | 736.7633 | 0.0000 |
| 490 | 3 | 736.7699 | 0.0000 |
| 491 | 3 | 736.7750 | 0.0001 |
| 492 | 2 | 736.7829 | 0.0000 |
| 493 | 3 | 736.7864 | 0.0002 |
| 494 | 3 | 736.7914 | 0.0000 |
| 495 | 3 | 736.7933 | 0.0004 |
| 496 | 1 | 736.7954 | 0.0003 |
| 497 | 3 | 736.8071 | 0.0000 |
| 498 | 3 | 736.8098 | 0.0001 |
| 499 | 3 | 736.8166 | 0.0001 |
| 500 | 1 | 736.8173 | 0.0000 |
| 501 | 1 | 736.8198 | 0.0000 |
| 502 | 2 | 736.8203 | 0.0000 |
| 503 | 3 | 736.8240 | 0.0000 |
| 504 | 3 | 736.8243 | 0.0006 |
| 505 | 2 | 736.8361 | 0.0000 |
| 506 | 3 | 736.8362 | 0.0001 |
| 507 | 3 | 736.8404 | 0.0002 |
| 508 | 2 | 736.8417 | 0.0001 |
| 509 | 1 | 736.8505 | 0.0000 |
| 510 | 3 | 736.8540 | 0.0001 |
| 511 | 1 | 736.8550 | 0.0000 |
| 512 | 3 | 736.8594 | 0.0000 |
| 513 | 2 | 736.8605 | 0.0001 |
| 514 | 3 | 736.8628 | 0.0001 |
| 515 | 3 | 736.8708 | 0.0000 |
| 516 | 3 | 736.8755 | 0.0000 |
| 517 | 1 | 736.8809 | 0.0000 |
| 518 | 4 | 736.8832 | 0.0002 |
| 519 | 3 | 736.8866 | 0.0000 |
| 520 | 2 | 736.8927 | 0.0001 |
| 521 | 3 | 736.8979 | 0.0001 |
| 522 | 3 | 736.8987 | 0.0001 |
| 523 | 5 | 736.8995 | 0.0001 |
| 524 | 3 | 736.9108 | 0.0001 |
| 525 | 2 | 736.9149 | 0.0000 |
| 526 | 1 | 736.9196 | 0.0000 |
| 527 | 3 | 736.9210 | 0.0000 |
| 528 | 1 | 736.9270 | 0.0005 |
| 529 | 3 | 736.9296 | 0.0000 |
| 530 | 3 | 736.9422 | 0.0000 |
| 531 | 3 | 736.9488 | 0.0000 |
| 532 | 3 | 736.9507 | 0.0001 |
| 533 | 2 | 736.9535 | 0.0001 |
| 534 | 1 | 736.9539 | 0.0000 |
| 535 | 2 | 736.9598 | 0.0000 |
| 536 | 3 | 736.9614 | 0.0000 |
| 537 | 3 | 736.9708 | 0.0000 |
| 538 | 3 | 736.9728 | 0.0000 |
| 539 | 2 | 736.9783 | 0.0001 |
| 540 | 3 | 736.9828 | 0.0006 |
| 541 | 3 | 736.9831 | 0.0000 |
| 542 | 3 | 736.9966 | 0.0002 |
| 543 | 1 | 737.0018 | 0.0005 |
| 544 | 1 | 737.0054 | 0.0000 |
| 545 | 3 | 737.0087 | 0.0001 |
| 546 | 2 | 737.0117 | 0.0000 |
| 547 | 3 | 737.0128 | 0.0001 |
| 548 | 1 | 737.0132 | 0.0001 |
| 549 | 3 | 737.0184 | 0.0001 |
| 550 | 3 | 737.0248 | 0.0001 |
| 551 | 1 | 737.0355 | 0.0000 |
| 552 | 5 | 737.0377 | 0.0011 |
| 553 | 1 | 737.0448 | 0.0003 |
| 554 | 3 | 737.0491 | 0.0002 |
| 555 | 3 | 737.0494 | 0.0001 |
| 556 | 3 | 737.0518 | 0.0000 |
| 557 | 2 | 737.0534 | 0.0000 |
| 558 | 3 | 737.0543 | 0.0001 |
| 559 | 1 | 737.0549 | 0.0000 |
| 560 | 3 | 737.0626 | 0.0001 |
| 561 | 3 | 737.0635 | 0.0000 |
| 562 | 2 | 737.0667 | 0.0000 |
| 563 | 3 | 737.0689 | 0.0000 |
| 564 | 4 | 737.0831 | 0.0009 |
| 565 | 3 | 737.0846 | 0.0000 |
| 566 | 2 | 737.0991 | 0.0001 |
| 567 | 3 | 737.1003 | 0.0007 |
| 568 | 1 | 737.1028 | 0.0000 |

|     |   |          |        |
|-----|---|----------|--------|
| 569 | 3 | 737.1095 | 0.0000 |
| 570 | 3 | 737.1206 | 0.0003 |
| 571 | 2 | 737.1222 | 0.0000 |
| 572 | 3 | 737.1237 | 0.0000 |
| 573 | 3 | 737.1343 | 0.0005 |
| 574 | 3 | 737.1376 | 0.0001 |
| 575 | 1 | 737.1410 | 0.0015 |
| 576 | 5 | 737.1452 | 0.0002 |
| 577 | 1 | 737.1502 | 0.0000 |
| 578 | 3 | 737.1566 | 0.0002 |
| 579 | 3 | 737.1610 | 0.0001 |
| 580 | 3 | 737.1619 | 0.0000 |
| 581 | 2 | 737.1653 | 0.0001 |
| 582 | 3 | 737.1664 | 0.0001 |
| 583 | 1 | 737.1702 | 0.0000 |
| 584 | 3 | 737.1823 | 0.0004 |
| 585 | 2 | 737.1908 | 0.0001 |
| 586 | 3 | 737.1948 | 0.0002 |
| 587 | 3 | 737.1972 | 0.0001 |
| 588 | 3 | 737.2000 | 0.0000 |
| 589 | 2 | 737.2037 | 0.0003 |
| 590 | 3 | 737.2213 | 0.0001 |
| 591 | 1 | 737.2217 | 0.0000 |
| 592 | 1 | 737.2359 | 0.0000 |
| 593 | 3 | 737.2419 | 0.0002 |
| 594 | 2 | 737.2507 | 0.0000 |
| 595 | 3 | 737.2595 | 0.0000 |
| 596 | 3 | 737.2655 | 0.0000 |
| 597 | 1 | 737.2708 | 0.0000 |
| 598 | 2 | 737.2757 | 0.0001 |
| 599 | 3 | 737.2764 | 0.0000 |
| 600 | 1 | 737.2773 | 0.0000 |
| 601 | 3 | 737.2833 | 0.0000 |
| 602 | 3 | 737.2950 | 0.0000 |
| 603 | 2 | 737.2958 | 0.0001 |
| 604 | 3 | 737.2991 | 0.0000 |
| 605 | 3 | 737.3004 | 0.0000 |
| 606 | 3 | 737.3180 | 0.0000 |
| 607 | 3 | 737.3234 | 0.0000 |
| 608 | 2 | 737.3239 | 0.0001 |
| 609 | 3 | 737.3322 | 0.0001 |
| 610 | 2 | 737.3362 | 0.0002 |
| 611 | 1 | 737.3384 | 0.0000 |
| 612 | 1 | 737.3399 | 0.0000 |
| 613 | 3 | 737.3449 | 0.0000 |
| 614 | 2 | 737.3508 | 0.0000 |
| 615 | 6 | 737.3533 | 0.0000 |
| 616 | 3 | 737.3600 | 0.0001 |
| 617 | 1 | 737.3603 | 0.0001 |
| 618 | 3 | 737.3652 | 0.0000 |
| 619 | 3 | 737.3709 | 0.0000 |
| 620 | 2 | 737.3734 | 0.0000 |
| 621 | 3 | 737.3742 | 0.0000 |
| 622 | 3 | 737.3785 | 0.0000 |
| 623 | 3 | 737.3933 | 0.0000 |
| 624 | 1 | 737.4107 | 0.0000 |
| 625 | 1 | 737.4147 | 0.0000 |
| 626 | 2 | 737.4182 | 0.0001 |
| 627 | 2 | 737.4241 | 0.0000 |
| 628 | 3 | 737.4269 | 0.0000 |
| 629 | 3 | 737.4292 | 0.0000 |
| 630 | 3 | 737.4320 | 0.0000 |
| 631 | 3 | 737.4435 | 0.0000 |
| 632 | 3 | 737.4474 | 0.0000 |
| 633 | 3 | 737.4481 | 0.0000 |
| 634 | 3 | 737.4555 | 0.0000 |
| 635 | 1 | 737.4561 | 0.0000 |
| 636 | 1 | 737.4670 | 0.0000 |
| 637 | 2 | 737.4708 | 0.0000 |
| 638 | 3 | 737.4715 | 0.0000 |
| 639 | 3 | 737.4748 | 0.0000 |
| 640 | 3 | 737.4828 | 0.0000 |
| 641 | 3 | 737.4856 | 0.0000 |
| 642 | 4 | 737.4906 | 0.0000 |
| 643 | 2 | 737.4935 | 0.0000 |
| 644 | 1 | 737.4963 | 0.0000 |
| 645 | 3 | 737.5114 | 0.0000 |
| 646 | 1 | 737.5117 | 0.0001 |
| 647 | 3 | 737.5128 | 0.0000 |
| 648 | 2 | 737.5131 | 0.0000 |
| 649 | 3 | 737.5255 | 0.0000 |
| 650 | 3 | 737.5256 | 0.0000 |
| 651 | 3 | 737.5319 | 0.0000 |
| 652 | 2 | 737.5323 | 0.0000 |
| 653 | 3 | 737.5356 | 0.0000 |
| 654 | 2 | 737.5430 | 0.0000 |
| 655 | 3 | 737.5434 | 0.0001 |



|     |   |          |        |
|-----|---|----------|--------|
| 656 | 1 | 737.5507 | 0.0000 |
| 657 | 3 | 737.5550 | 0.0000 |
| 658 | 3 | 737.5562 | 0.0000 |
| 659 | 3 | 737.5678 | 0.0000 |
| 660 | 3 | 737.5687 | 0.0000 |
| 661 | 3 | 737.5838 | 0.0001 |
| 662 | 2 | 737.5862 | 0.0001 |
| 663 | 3 | 737.5869 | 0.0000 |
| 664 | 1 | 737.5954 | 0.0000 |
| 665 | 3 | 737.6033 | 0.0000 |
| 666 | 1 | 737.6081 | 0.0001 |
| 667 | 3 | 737.6147 | 0.0000 |
| 668 | 1 | 737.6161 | 0.0000 |
| 669 | 3 | 737.6255 | 0.0001 |
| 670 | 3 | 737.6278 | 0.0000 |
| 671 | 2 | 737.6378 | 0.0001 |
| 672 | 3 | 737.6421 | 0.0000 |
| 673 | 3 | 737.6496 | 0.0000 |
| 674 | 3 | 737.6551 | 0.0000 |
| 675 | 1 | 737.6642 | 0.0000 |
| 676 | 3 | 737.6671 | 0.0000 |
| 677 | 3 | 737.6691 | 0.0000 |
| 678 | 2 | 737.6695 | 0.0000 |
| 679 | 3 | 737.6908 | 0.0000 |
| 680 | 2 | 737.6937 | 0.0000 |
| 681 | 3 | 737.6954 | 0.0000 |
| 682 | 3 | 737.6973 | 0.0000 |
| 683 | 1 | 737.7037 | 0.0000 |
| 684 | 1 | 737.7082 | 0.0000 |
| 685 | 3 | 737.7115 | 0.0000 |
| 686 | 1 | 737.7119 | 0.0000 |
| 687 | 2 | 737.7189 | 0.0000 |
| 688 | 1 | 737.7272 | 0.0000 |
| 689 | 3 | 737.7322 | 0.0000 |
| 690 | 3 | 737.7360 | 0.0000 |
| 691 | 3 | 737.7382 | 0.0000 |
| 692 | 2 | 737.7442 | 0.0000 |
| 693 | 2 | 737.7601 | 0.0000 |
| 694 | 3 | 737.7613 | 0.0001 |
| 695 | 3 | 737.7853 | 0.0000 |
| 696 | 2 | 737.7877 | 0.0000 |
| 697 | 3 | 737.7949 | 0.0000 |
| 698 | 3 | 737.7971 | 0.0000 |
| 699 | 3 | 737.7985 | 0.0000 |
| 700 | 2 | 737.7995 | 0.0000 |
| 701 | 3 | 737.8144 | 0.0000 |
| 702 | 3 | 737.8165 | 0.0000 |
| 703 | 1 | 737.8332 | 0.0000 |
| 704 | 3 | 737.8373 | 0.0000 |
| 705 | 3 | 737.8392 | 0.0000 |
| 706 | 2 | 737.8545 | 0.0000 |
| 707 | 3 | 737.8581 | 0.0000 |
| 708 | 1 | 737.8586 | 0.0000 |
| 709 | 3 | 737.8616 | 0.0000 |
| 710 | 3 | 737.8697 | 0.0000 |
| 711 | 3 | 737.8905 | 0.0000 |
| 712 | 2 | 737.8983 | 0.0000 |
| 713 | 1 | 737.8997 | 0.0000 |
| 714 | 1 | 737.9047 | 0.0000 |
| 715 | 3 | 737.9078 | 0.0000 |
| 716 | 2 | 737.9106 | 0.0000 |
| 717 | 1 | 737.9153 | 0.0002 |
| 718 | 1 | 737.9211 | 0.0000 |
| 719 | 3 | 737.9218 | 0.0001 |
| 720 | 3 | 737.9373 | 0.0000 |
| 721 | 3 | 737.9462 | 0.0000 |
| 722 | 2 | 737.9500 | 0.0000 |
| 723 | 3 | 737.9610 | 0.0000 |
| 724 | 3 | 737.9701 | 0.0000 |
| 725 | 3 | 737.9736 | 0.0000 |
| 726 | 1 | 737.9747 | 0.0000 |
| 727 | 2 | 737.9868 | 0.0000 |
| 728 | 3 | 737.9896 | 0.0000 |
| 729 | 3 | 738.0004 | 0.0000 |
| 730 | 3 | 738.0083 | 0.0001 |
| 731 | 2 | 738.0111 | 0.0000 |
| 732 | 3 | 738.0312 | 0.0000 |
| 733 | 3 | 738.0374 | 0.0000 |
| 734 | 1 | 738.0379 | 0.0001 |
| 735 | 3 | 738.0397 | 0.0000 |
| 736 | 3 | 738.0420 | 0.0000 |
| 737 | 2 | 738.0477 | 0.0000 |
| 738 | 1 | 738.0616 | 0.0001 |
| 739 | 3 | 738.0624 | 0.0001 |
| 740 | 2 | 738.0690 | 0.0000 |
| 741 | 1 | 738.0723 | 0.0000 |
| 742 | 3 | 738.0725 | 0.0000 |

|     |   |          |        |
|-----|---|----------|--------|
| 743 | 3 | 738.0736 | 0.0000 |
| 744 | 3 | 738.0890 | 0.0000 |
| 745 | 3 | 738.0964 | 0.0000 |
| 746 | 3 | 738.0992 | 0.0000 |
| 747 | 3 | 738.1119 | 0.0000 |
| 748 | 2 | 738.1161 | 0.0000 |
| 749 | 3 | 738.1255 | 0.0000 |
| 750 | 3 | 738.1382 | 0.0000 |
| 751 | 3 | 738.1431 | 0.0000 |
| 752 | 1 | 738.1440 | 0.0000 |
| 753 | 1 | 738.1607 | 0.0000 |
| 754 | 2 | 738.1622 | 0.0000 |
| 755 | 3 | 738.1660 | 0.0000 |
| 756 | 3 | 738.1771 | 0.0000 |
| 757 | 3 | 738.1899 | 0.0000 |
| 758 | 1 | 738.1910 | 0.0001 |
| 759 | 3 | 738.1983 | 0.0000 |
| 760 | 3 | 738.2018 | 0.0000 |
| 761 | 3 | 738.2137 | 0.0000 |
| 762 | 1 | 738.2139 | 0.0000 |
| 763 | 2 | 738.2153 | 0.0000 |
| 764 | 2 | 738.2193 | 0.0000 |
| 765 | 3 | 738.2206 | 0.0000 |
| 766 | 3 | 738.2315 | 0.0000 |
| 767 | 2 | 738.2483 | 0.0000 |
| 768 | 3 | 738.2487 | 0.0000 |
| 769 | 3 | 738.2629 | 0.0000 |
| 770 | 3 | 738.2746 | 0.0000 |
| 771 | 1 | 738.2795 | 0.0000 |
| 772 | 3 | 738.2819 | 0.0000 |
| 773 | 2 | 738.3181 | 0.0000 |
| 774 | 3 | 738.3208 | 0.0001 |
| 775 | 3 | 738.3214 | 0.0000 |
| 776 | 3 | 738.3332 | 0.0000 |
| 777 | 1 | 738.3362 | 0.0000 |
| 778 | 3 | 738.3366 | 0.0000 |
| 779 | 1 | 738.3372 | 0.0000 |
| 780 | 3 | 738.3527 | 0.0000 |
| 781 | 3 | 738.3534 | 0.0000 |
| 782 | 2 | 738.3659 | 0.0000 |
| 783 | 1 | 738.3728 | 0.0000 |
| 784 | 3 | 738.3804 | 0.0000 |
| 785 | 3 | 738.3834 | 0.0000 |
| 786 | 2 | 738.3882 | 0.0000 |
| 787 | 3 | 738.4179 | 0.0000 |
| 788 | 3 | 738.4182 | 0.0000 |
| 789 | 1 | 738.4242 | 0.0000 |
| 790 | 3 | 738.4245 | 0.0000 |
| 791 | 2 | 738.4365 | 0.0000 |
| 792 | 3 | 738.4606 | 0.0000 |
| 793 | 2 | 738.4629 | 0.0000 |
| 794 | 3 | 738.4884 | 0.0000 |
| 795 | 3 | 738.4891 | 0.0000 |
| 796 | 3 | 738.4956 | 0.0000 |
| 797 | 3 | 738.5248 | 0.0000 |
| 798 | 2 | 738.5295 | 0.0000 |
| 799 | 1 | 738.5322 | 0.0000 |
| 800 | 1 | 738.5413 | 0.0000 |
| 801 | 3 | 738.5648 | 0.0000 |
| 802 | 3 | 738.6264 | 0.0000 |
| 803 | 2 | 738.6277 | 0.0000 |
| 804 | 3 | 738.6420 | 0.0000 |
| 805 | 3 | 738.6702 | 0.0000 |
| 806 | 1 | 738.6825 | 0.0000 |
| 807 | 2 | 738.7003 | 0.0000 |
| 808 | 3 | 738.7006 | 0.0000 |
| 809 | 3 | 738.7202 | 0.0000 |
| 810 | 3 | 738.7306 | 0.0000 |
| 811 | 3 | 738.7544 | 0.0000 |
| 812 | 2 | 738.7742 | 0.0000 |
| 813 | 3 | 738.7938 | 0.0000 |
| 814 | 3 | 738.7951 | 0.0000 |
| 815 | 2 | 738.7952 | 0.0000 |
| 816 | 1 | 738.8131 | 0.0000 |
| 817 | 3 | 738.8201 | 0.0000 |
| 818 | 3 | 738.8290 | 0.0000 |
| 819 | 3 | 738.8497 | 0.0000 |
| 820 | 2 | 738.8559 | 0.0000 |
| 821 | 1 | 738.8901 | 0.0000 |
| 822 | 1 | 738.8905 | 0.0000 |
| 823 | 3 | 738.8918 | 0.0000 |
| 824 | 3 | 738.8926 | 0.0000 |
| 825 | 3 | 738.9303 | 0.0000 |
| 826 | 3 | 738.9364 | 0.0000 |
| 827 | 2 | 738.9458 | 0.0000 |
| 828 | 3 | 738.9880 | 0.0000 |
| 829 | 1 | 738.9923 | 0.0000 |

|     |   |          |        |
|-----|---|----------|--------|
| 830 | 2 | 739.0066 | 0.0000 |
| 831 | 3 | 739.0399 | 0.0001 |
| 832 | 3 | 739.0493 | 0.0000 |
| 833 | 1 | 739.0558 | 0.0000 |
| 834 | 3 | 739.0692 | 0.0000 |
| 835 | 1 | 739.0761 | 0.0000 |
| 836 | 2 | 739.0762 | 0.0000 |
| 837 | 3 | 739.0789 | 0.0000 |
| 838 | 3 | 739.1026 | 0.0000 |
| 839 | 3 | 739.1232 | 0.0000 |
| 840 | 3 | 739.1263 | 0.0000 |
| 841 | 3 | 739.1379 | 0.0000 |
| 842 | 2 | 739.1456 | 0.0000 |
| 843 | 2 | 739.1724 | 0.0000 |
| 844 | 3 | 739.1731 | 0.0000 |
| 845 | 3 | 739.2059 | 0.0000 |
| 846 | 3 | 739.2143 | 0.0000 |
| 847 | 2 | 739.2285 | 0.0000 |
| 848 | 3 | 739.2306 | 0.0000 |
| 849 | 3 | 739.2329 | 0.0000 |
| 850 | 3 | 739.2481 | 0.0000 |
| 851 | 3 | 739.2598 | 0.0000 |
| 852 | 1 | 739.2638 | 0.0000 |
| 853 | 3 | 739.2648 | 0.0000 |
| 854 | 2 | 739.3054 | 0.0000 |
| 855 | 3 | 739.3075 | 0.0000 |
| 856 | 3 | 739.3545 | 0.0000 |
| 857 | 2 | 739.3551 | 0.0000 |
| 858 | 3 | 739.3847 | 0.0000 |
| 859 | 1 | 739.3968 | 0.0000 |
| 860 | 1 | 739.4440 | 0.0000 |
| 861 | 3 | 739.5838 | 0.0000 |
| 862 | 2 | 740.0413 | 0.0000 |
| 863 | 3 | 740.0563 | 0.0000 |
| 864 | 3 | 740.2251 | 0.0000 |
| 865 | 3 | 740.2553 | 0.0000 |
| 866 | 1 | 740.2595 | 0.0000 |
| 867 | 2 | 740.2641 | 0.0000 |
| 868 | 1 | 740.2805 | 0.0000 |
| 869 | 3 | 740.2917 | 0.0000 |
| 870 | 3 | 740.2922 | 0.0000 |
| 871 | 2 | 740.3075 | 0.0000 |
| 872 | 3 | 740.3495 | 0.0000 |
| 873 | 3 | 740.3957 | 0.0000 |
| 874 | 3 | 740.5760 | 0.0000 |
| 875 | 1 | 740.6600 | 0.0000 |
| 876 | 3 | 740.6839 | 0.0000 |
| 877 | 3 | 740.7180 | 0.0000 |
| 878 | 3 | 740.8500 | 0.0000 |
| 879 | 2 | 740.8777 | 0.0000 |
| 880 | 3 | 740.9242 | 0.0000 |
| 881 | 3 | 740.9817 | 0.0000 |
| 882 | 1 | 741.0143 | 0.0000 |
| 883 | 2 | 741.0166 | 0.0000 |
| 884 | 3 | 741.0612 | 0.0000 |
| 885 | 3 | 741.1462 | 0.0000 |
| 886 | 2 | 741.2004 | 0.0000 |
| 887 | 1 | 741.2141 | 0.0000 |
| 888 | 3 | 741.2353 | 0.0000 |
| 889 | 3 | 741.2666 | 0.0000 |
| 890 | 2 | 741.3627 | 0.0000 |
| 891 | 3 | 741.3938 | 0.0000 |
| 892 | 1 | 741.4199 | 0.0000 |
| 893 | 3 | 741.4449 | 0.0000 |
| 894 | 3 | 741.4450 | 0.0000 |

**Table S5** Numerical values for the multiplet energy levels, degeneracies and oscillator strength calculated for the  $4d^{10}5f^2 \rightarrow 4d^9 5f^3$  transitions of  $U^{4+}$  in  $UO_2$  represented graphically in the lower panel of Figure 6.

| #  | Multiplicity | Energy levels [eV] | Oscillator strength [-] |
|----|--------------|--------------------|-------------------------|
| 1  | 1            | 775.9705           | 0.0000                  |
| 2  | 1            | 775.9712           | 0.0011                  |
| 3  | 3            | 775.9831           | 0.0005                  |
| 4  | 3            | 775.9846           | 0.0020                  |
| 5  | 2            | 776.0778           | 0.0048                  |
| 6  | 3            | 776.0958           | 0.0018                  |
| 7  | 3            | 776.1820           | 0.0110                  |
| 8  | 1            | 776.2134           | 0.0171                  |
| 9  | 3            | 776.2238           | 0.0013                  |
| 10 | 3            | 776.2337           | 0.0236                  |
| 11 | 2            | 776.2674           | 0.0061                  |
| 12 | 3            | 776.2949           | 0.0001                  |
| 13 | 3            | 776.3190           | 0.0217                  |
| 14 | 3            | 776.4093           | 0.0510                  |

|     |   |          |        |
|-----|---|----------|--------|
| 15  | 1 | 776.4439 | 0.0000 |
| 16  | 2 | 776.4531 | 0.0202 |
| 17  | 3 | 776.4975 | 0.0112 |
| 18  | 2 | 776.5422 | 0.0027 |
| 19  | 3 | 776.5453 | 0.0053 |
| 20  | 3 | 776.5568 | 0.0075 |
| 21  | 3 | 776.5676 | 0.0005 |
| 22  | 1 | 776.6105 | 0.0013 |
| 23  | 2 | 776.6158 | 0.0033 |
| 24  | 3 | 776.6284 | 0.0020 |
| 25  | 1 | 776.6456 | 0.0000 |
| 26  | 3 | 776.6613 | 0.0006 |
| 27  | 3 | 776.6617 | 0.0005 |
| 28  | 3 | 776.7066 | 0.0009 |
| 29  | 3 | 776.7217 | 0.0027 |
| 30  | 2 | 776.7320 | 0.0003 |
| 31  | 1 | 776.7758 | 0.0000 |
| 32  | 3 | 776.8234 | 0.0007 |
| 33  | 3 | 776.8491 | 0.0000 |
| 34  | 3 | 776.8565 | 0.0001 |
| 35  | 2 | 776.9006 | 0.0019 |
| 36  | 1 | 776.9035 | 0.0006 |
| 37  | 3 | 776.9103 | 0.0038 |
| 38  | 2 | 776.9607 | 0.0000 |
| 39  | 3 | 776.9616 | 0.0001 |
| 40  | 1 | 776.9646 | 0.0000 |
| 41  | 3 | 776.9659 | 0.0010 |
| 42  | 3 | 776.9729 | 0.0003 |
| 43  | 3 | 776.9750 | 0.0002 |
| 44  | 2 | 776.9807 | 0.0002 |
| 45  | 1 | 777.0050 | 0.0042 |
| 46  | 3 | 777.0116 | 0.0000 |
| 47  | 3 | 777.0230 | 0.0012 |
| 48  | 3 | 777.0737 | 0.0004 |
| 49  | 2 | 777.0800 | 0.0003 |
| 50  | 1 | 777.1060 | 0.0039 |
| 51  | 3 | 777.1077 | 0.0016 |
| 52  | 2 | 777.1079 | 0.0001 |
| 53  | 3 | 777.1198 | 0.0001 |
| 54  | 3 | 777.1345 | 0.0001 |
| 55  | 3 | 777.1425 | 0.0006 |
| 56  | 3 | 777.1618 | 0.0021 |
| 57  | 3 | 777.1766 | 0.0001 |
| 58  | 2 | 777.1798 | 0.0005 |
| 59  | 1 | 777.1934 | 0.0000 |
| 60  | 3 | 777.2030 | 0.0055 |
| 61  | 1 | 777.2241 | 0.0099 |
| 62  | 3 | 777.2433 | 0.0085 |
| 63  | 2 | 777.2482 | 0.0002 |
| 64  | 3 | 777.2539 | 0.0000 |
| 65  | 1 | 777.2578 | 0.0000 |
| 66  | 3 | 777.2636 | 0.0002 |
| 67  | 3 | 777.2644 | 0.0000 |
| 68  | 1 | 777.2735 | 0.0001 |
| 69  | 3 | 777.2762 | 0.0001 |
| 70  | 3 | 777.2771 | 0.0001 |
| 71  | 3 | 777.2980 | 0.0019 |
| 72  | 1 | 777.2988 | 0.0000 |
| 73  | 3 | 777.2998 | 0.0028 |
| 74  | 2 | 777.3026 | 0.0002 |
| 75  | 1 | 777.3062 | 0.0000 |
| 76  | 3 | 777.3207 | 0.0015 |
| 77  | 3 | 777.3256 | 0.0000 |
| 78  | 3 | 777.3284 | 0.0005 |
| 79  | 1 | 777.3347 | 0.0012 |
| 80  | 2 | 777.3368 | 0.0002 |
| 81  | 3 | 777.3436 | 0.0002 |
| 82  | 2 | 777.3451 | 0.0008 |
| 83  | 3 | 777.3725 | 0.0025 |
| 84  | 4 | 777.4054 | 0.0004 |
| 85  | 2 | 777.4061 | 0.0000 |
| 86  | 3 | 777.4141 | 0.0002 |
| 87  | 1 | 777.4143 | 0.0001 |
| 88  | 3 | 777.4239 | 0.0000 |
| 89  | 3 | 777.4293 | 0.0002 |
| 90  | 3 | 777.4441 | 0.0002 |
| 91  | 2 | 777.4539 | 0.0000 |
| 92  | 1 | 777.4577 | 0.0000 |
| 93  | 3 | 777.4664 | 0.0033 |
| 94  | 1 | 777.4669 | 0.0012 |
| 95  | 3 | 777.4759 | 0.0000 |
| 96  | 3 | 777.4890 | 0.0001 |
| 97  | 3 | 777.5004 | 0.0001 |
| 98  | 2 | 777.5020 | 0.0004 |
| 99  | 3 | 777.5114 | 0.0002 |
| 100 | 3 | 777.5224 | 0.0004 |
| 101 | 1 | 777.5252 | 0.0000 |

|     |   |          |        |
|-----|---|----------|--------|
| 102 | 2 | 777.5287 | 0.0000 |
| 103 | 3 | 777.5373 | 0.0020 |
| 104 | 1 | 777.5437 | 0.0017 |
| 105 | 3 | 777.5486 | 0.0000 |
| 106 | 3 | 777.5586 | 0.0009 |
| 107 | 3 | 777.5698 | 0.0005 |
| 108 | 1 | 777.5760 | 0.0000 |
| 109 | 2 | 777.5790 | 0.0002 |
| 110 | 3 | 777.5956 | 0.0002 |
| 111 | 2 | 777.6137 | 0.0002 |
| 112 | 1 | 777.6160 | 0.0004 |
| 113 | 3 | 777.6195 | 0.0002 |
| 114 | 3 | 777.6196 | 0.0000 |
| 115 | 3 | 777.6221 | 0.0001 |
| 116 | 3 | 777.6366 | 0.0000 |
| 117 | 3 | 777.6428 | 0.0006 |
| 118 | 3 | 777.6452 | 0.0000 |
| 119 | 3 | 777.6761 | 0.0042 |
| 120 | 1 | 777.6802 | 0.0000 |
| 121 | 3 | 777.6841 | 0.0002 |
| 122 | 1 | 777.6918 | 0.0046 |
| 123 | 3 | 777.6954 | 0.0000 |
| 124 | 2 | 777.6964 | 0.0009 |
| 125 | 2 | 777.6983 | 0.0002 |
| 126 | 3 | 777.7032 | 0.0000 |
| 127 | 3 | 777.7332 | 0.0001 |
| 128 | 3 | 777.7355 | 0.0002 |
| 129 | 3 | 777.7439 | 0.0000 |
| 130 | 3 | 777.7521 | 0.0000 |
| 131 | 2 | 777.7607 | 0.0003 |
| 132 | 3 | 777.7654 | 0.0000 |
| 133 | 2 | 777.7797 | 0.0000 |
| 134 | 1 | 777.7829 | 0.0000 |
| 135 | 3 | 777.7831 | 0.0000 |
| 136 | 3 | 777.7873 | 0.0016 |
| 137 | 3 | 777.7882 | 0.0000 |
| 138 | 2 | 777.8031 | 0.0001 |
| 139 | 3 | 777.8083 | 0.0000 |
| 140 | 2 | 777.8178 | 0.0001 |
| 141 | 3 | 777.8202 | 0.0006 |
| 142 | 3 | 777.8292 | 0.0004 |
| 143 | 3 | 777.8360 | 0.0012 |
| 144 | 1 | 777.8394 | 0.0000 |
| 145 | 2 | 777.8400 | 0.0001 |
| 146 | 3 | 777.8545 | 0.0003 |
| 147 | 1 | 777.8554 | 0.0000 |
| 148 | 3 | 777.8672 | 0.0000 |
| 149 | 2 | 777.8734 | 0.0000 |
| 150 | 3 | 777.8824 | 0.0000 |
| 151 | 2 | 777.8935 | 0.0000 |
| 152 | 4 | 777.8999 | 0.0011 |
| 153 | 1 | 777.9098 | 0.0000 |
| 154 | 3 | 777.9110 | 0.0002 |
| 155 | 1 | 777.9116 | 0.0000 |
| 156 | 3 | 777.9305 | 0.0000 |
| 157 | 3 | 777.9338 | 0.0001 |
| 158 | 3 | 777.9375 | 0.0001 |
| 159 | 3 | 777.9523 | 0.0002 |
| 160 | 3 | 777.9615 | 0.0004 |
| 161 | 2 | 777.9630 | 0.0000 |
| 162 | 2 | 777.9841 | 0.0000 |
| 163 | 3 | 777.9926 | 0.0000 |
| 164 | 1 | 777.9940 | 0.0000 |
| 165 | 3 | 778.0055 | 0.0000 |
| 166 | 3 | 778.0131 | 0.0000 |
| 167 | 3 | 778.0224 | 0.0000 |
| 168 | 1 | 778.0270 | 0.0016 |
| 169 | 1 | 778.0344 | 0.0000 |
| 170 | 2 | 778.0353 | 0.0000 |
| 171 | 3 | 778.0425 | 0.0001 |
| 172 | 3 | 778.0469 | 0.0002 |
| 173 | 1 | 778.0615 | 0.0002 |
| 174 | 3 | 778.0641 | 0.0000 |
| 175 | 2 | 778.0649 | 0.0001 |
| 176 | 3 | 778.0691 | 0.0001 |
| 177 | 3 | 778.0769 | 0.0002 |
| 178 | 3 | 778.0778 | 0.0000 |
| 179 | 3 | 778.0914 | 0.0003 |
| 180 | 3 | 778.0968 | 0.0001 |
| 181 | 1 | 778.0983 | 0.0000 |
| 182 | 2 | 778.1033 | 0.0000 |
| 183 | 1 | 778.1074 | 0.0003 |
| 184 | 2 | 778.1147 | 0.0002 |
| 185 | 3 | 778.1220 | 0.0001 |
| 186 | 3 | 778.1248 | 0.0001 |
| 187 | 3 | 778.1397 | 0.0001 |
| 188 | 3 | 778.1407 | 0.0010 |

|     |   |          |        |
|-----|---|----------|--------|
| 189 | 3 | 778.1512 | 0.0003 |
| 190 | 3 | 778.1540 | 0.0000 |
| 191 | 3 | 778.1587 | 0.0000 |
| 192 | 3 | 778.1653 | 0.0000 |
| 193 | 2 | 778.1783 | 0.0002 |
| 194 | 3 | 778.1788 | 0.0002 |
| 195 | 3 | 778.1817 | 0.0000 |
| 196 | 3 | 778.1906 | 0.0000 |
| 197 | 1 | 778.1907 | 0.0000 |
| 198 | 2 | 778.2010 | 0.0001 |
| 199 | 3 | 778.2019 | 0.0001 |
| 200 | 1 | 778.2052 | 0.0010 |
| 201 | 3 | 778.2130 | 0.0000 |
| 202 | 3 | 778.2209 | 0.0001 |
| 203 | 2 | 778.2238 | 0.0000 |
| 204 | 1 | 778.2242 | 0.0000 |
| 205 | 2 | 778.2340 | 0.0000 |
| 206 | 3 | 778.2417 | 0.0005 |
| 207 | 3 | 778.2455 | 0.0000 |
| 208 | 1 | 778.2477 | 0.0000 |
| 209 | 3 | 778.2656 | 0.0000 |
| 210 | 3 | 778.2720 | 0.0000 |
| 211 | 3 | 778.2737 | 0.0000 |
| 212 | 2 | 778.2778 | 0.0001 |
| 213 | 1 | 778.2791 | 0.0004 |
| 214 | 3 | 778.2802 | 0.0000 |
| 215 | 3 | 778.2818 | 0.0000 |
| 216 | 3 | 778.2944 | 0.0000 |
| 217 | 1 | 778.2958 | 0.0002 |
| 218 | 1 | 778.3018 | 0.0000 |
| 219 | 2 | 778.3068 | 0.0000 |
| 220 | 3 | 778.3127 | 0.0008 |
| 221 | 3 | 778.3207 | 0.0000 |
| 222 | 1 | 778.3233 | 0.0001 |
| 223 | 3 | 778.3301 | 0.0008 |
| 224 | 3 | 778.3388 | 0.0001 |
| 225 | 3 | 778.3428 | 0.0000 |
| 226 | 2 | 778.3430 | 0.0000 |
| 227 | 3 | 778.3605 | 0.0000 |
| 228 | 2 | 778.3610 | 0.0000 |
| 229 | 1 | 778.3612 | 0.0000 |
| 230 | 1 | 778.3664 | 0.0000 |
| 231 | 3 | 778.3691 | 0.0002 |
| 232 | 3 | 778.3705 | 0.0000 |
| 233 | 3 | 778.3872 | 0.0001 |
| 234 | 2 | 778.3922 | 0.0000 |
| 235 | 3 | 778.3954 | 0.0013 |
| 236 | 1 | 778.3972 | 0.0006 |
| 237 | 3 | 778.4013 | 0.0001 |
| 238 | 3 | 778.4023 | 0.0000 |
| 239 | 3 | 778.4113 | 0.0000 |
| 240 | 2 | 778.4158 | 0.0000 |
| 241 | 3 | 778.4200 | 0.0000 |
| 242 | 2 | 778.4382 | 0.0000 |
| 243 | 3 | 778.4384 | 0.0005 |
| 244 | 3 | 778.4495 | 0.0001 |
| 245 | 3 | 778.4623 | 0.0000 |
| 246 | 3 | 778.4707 | 0.0002 |
| 247 | 3 | 778.4880 | 0.0001 |
| 248 | 1 | 778.4901 | 0.0000 |
| 249 | 1 | 778.4929 | 0.0000 |
| 250 | 3 | 778.4966 | 0.0000 |
| 251 | 2 | 778.5037 | 0.0000 |
| 252 | 3 | 778.5155 | 0.0000 |
| 253 | 3 | 778.5159 | 0.0001 |
| 254 | 2 | 778.5262 | 0.0001 |
| 255 | 3 | 778.5286 | 0.0000 |
| 256 | 3 | 778.5291 | 0.0000 |
| 257 | 2 | 778.5452 | 0.0000 |
| 258 | 3 | 778.5660 | 0.0001 |
| 259 | 3 | 778.5707 | 0.0012 |
| 260 | 1 | 778.5733 | 0.0007 |
| 261 | 2 | 778.5819 | 0.0001 |
| 262 | 2 | 778.5986 | 0.0000 |
| 263 | 1 | 778.6003 | 0.0005 |
| 264 | 3 | 778.6023 | 0.0003 |
| 265 | 3 | 778.6061 | 0.0000 |
| 266 | 3 | 778.6172 | 0.0001 |
| 267 | 1 | 778.6195 | 0.0000 |
| 268 | 3 | 778.6233 | 0.0000 |
| 269 | 1 | 778.6356 | 0.0000 |
| 270 | 3 | 778.6379 | 0.0002 |
| 271 | 2 | 778.6459 | 0.0000 |
| 272 | 3 | 778.6489 | 0.0000 |
| 273 | 3 | 778.6541 | 0.0000 |
| 274 | 3 | 778.6571 | 0.0000 |
| 275 | 2 | 778.6572 | 0.0000 |

|     |   |          |        |
|-----|---|----------|--------|
| 276 | 1 | 778.6625 | 0.0000 |
| 277 | 2 | 778.6639 | 0.0000 |
| 278 | 1 | 778.6690 | 0.0000 |
| 279 | 3 | 778.6696 | 0.0000 |
| 280 | 3 | 778.6803 | 0.0000 |
| 281 | 1 | 778.6952 | 0.0000 |
| 282 | 3 | 778.6962 | 0.0000 |
| 283 | 2 | 778.6968 | 0.0000 |
| 284 | 3 | 778.7001 | 0.0000 |
| 285 | 3 | 778.7060 | 0.0000 |
| 286 | 1 | 778.7156 | 0.0000 |
| 287 | 3 | 778.7206 | 0.0001 |
| 288 | 3 | 778.7219 | 0.0000 |
| 289 | 3 | 778.7243 | 0.0001 |
| 290 | 3 | 778.7312 | 0.0000 |
| 291 | 2 | 778.7483 | 0.0000 |
| 292 | 3 | 778.7529 | 0.0002 |
| 293 | 3 | 778.7556 | 0.0000 |
| 294 | 1 | 778.7559 | 0.0000 |
| 295 | 3 | 778.7583 | 0.0001 |
| 296 | 1 | 778.7610 | 0.0001 |
| 297 | 1 | 778.7648 | 0.0000 |
| 298 | 2 | 778.7698 | 0.0000 |
| 299 | 3 | 778.7718 | 0.0001 |
| 300 | 3 | 778.7732 | 0.0000 |
| 301 | 1 | 778.7823 | 0.0000 |
| 302 | 3 | 778.7884 | 0.0000 |
| 303 | 3 | 778.8000 | 0.0000 |
| 304 | 3 | 778.8020 | 0.0002 |
| 305 | 1 | 778.8044 | 0.0001 |
| 306 | 2 | 778.8054 | 0.0001 |
| 307 | 2 | 778.8095 | 0.0001 |
| 308 | 3 | 778.8167 | 0.0000 |
| 309 | 3 | 778.8213 | 0.0000 |
| 310 | 2 | 778.8370 | 0.0000 |
| 311 | 1 | 778.8372 | 0.0003 |
| 312 | 3 | 778.8403 | 0.0000 |
| 313 | 3 | 778.8420 | 0.0000 |
| 314 | 3 | 778.8428 | 0.0001 |
| 315 | 3 | 778.8457 | 0.0000 |
| 316 | 3 | 778.8622 | 0.0002 |
| 317 | 1 | 778.8673 | 0.0000 |
| 318 | 3 | 778.8686 | 0.0001 |
| 319 | 2 | 778.8718 | 0.0000 |
| 320 | 3 | 778.8797 | 0.0000 |
| 321 | 3 | 778.8902 | 0.0000 |
| 322 | 3 | 778.8937 | 0.0001 |
| 323 | 2 | 778.8948 | 0.0001 |
| 324 | 3 | 778.9060 | 0.0001 |
| 325 | 2 | 778.9138 | 0.0000 |
| 326 | 3 | 778.9167 | 0.0001 |
| 327 | 3 | 778.9187 | 0.0000 |
| 328 | 3 | 778.9357 | 0.0000 |
| 329 | 3 | 778.9373 | 0.0001 |
| 330 | 1 | 778.9381 | 0.0000 |
| 331 | 2 | 778.9419 | 0.0000 |
| 332 | 3 | 778.9424 | 0.0002 |
| 333 | 3 | 778.9481 | 0.0000 |
| 334 | 3 | 778.9633 | 0.0000 |
| 335 | 1 | 778.9656 | 0.0000 |
| 336 | 3 | 778.9739 | 0.0000 |
| 337 | 3 | 778.9761 | 0.0001 |
| 338 | 1 | 778.9796 | 0.0000 |
| 339 | 3 | 778.9867 | 0.0000 |
| 340 | 1 | 778.9980 | 0.0000 |
| 341 | 3 | 778.9993 | 0.0000 |
| 342 | 2 | 779.0027 | 0.0001 |
| 343 | 2 | 779.0147 | 0.0000 |
| 344 | 3 | 779.0257 | 0.0000 |
| 345 | 3 | 779.0319 | 0.0001 |
| 346 | 1 | 779.0409 | 0.0000 |
| 347 | 2 | 779.0437 | 0.0000 |
| 348 | 3 | 779.0442 | 0.0000 |
| 349 | 3 | 779.0471 | 0.0001 |
| 350 | 1 | 779.0478 | 0.0003 |
| 351 | 2 | 779.0489 | 0.0000 |
| 352 | 1 | 779.0590 | 0.0000 |
| 353 | 3 | 779.0803 | 0.0000 |
| 354 | 3 | 779.0858 | 0.0001 |
| 355 | 3 | 779.0924 | 0.0002 |
| 356 | 3 | 779.0985 | 0.0001 |
| 357 | 3 | 779.1020 | 0.0000 |
| 358 | 3 | 779.1171 | 0.0001 |
| 359 | 2 | 779.1173 | 0.0001 |
| 360 | 3 | 779.1260 | 0.0000 |
| 361 | 3 | 779.1334 | 0.0000 |
| 362 | 1 | 779.1440 | 0.0001 |

|     |   |          |        |
|-----|---|----------|--------|
| 363 | 3 | 779.1458 | 0.0000 |
| 364 | 2 | 779.1478 | 0.0000 |
| 365 | 3 | 779.1597 | 0.0000 |
| 366 | 3 | 779.1628 | 0.0000 |
| 367 | 3 | 779.1651 | 0.0001 |
| 368 | 3 | 779.1671 | 0.0001 |
| 369 | 1 | 779.1721 | 0.0000 |
| 370 | 2 | 779.1731 | 0.0000 |
| 371 | 1 | 779.1841 | 0.0000 |
| 372 | 3 | 779.1956 | 0.0000 |
| 373 | 2 | 779.1988 | 0.0000 |
| 374 | 3 | 779.2066 | 0.0000 |
| 375 | 1 | 779.2175 | 0.0000 |
| 376 | 1 | 779.2225 | 0.0003 |
| 377 | 3 | 779.2232 | 0.0000 |
| 378 | 3 | 779.2298 | 0.0000 |
| 379 | 2 | 779.2353 | 0.0000 |
| 380 | 3 | 779.2378 | 0.0000 |
| 381 | 3 | 779.2465 | 0.0000 |
| 382 | 2 | 779.2529 | 0.0000 |
| 383 | 3 | 779.2609 | 0.0001 |
| 384 | 1 | 779.2695 | 0.0000 |
| 385 | 3 | 779.2709 | 0.0002 |
| 386 | 3 | 779.2721 | 0.0000 |
| 387 | 3 | 779.2745 | 0.0000 |
| 388 | 2 | 779.2748 | 0.0000 |
| 389 | 1 | 779.2917 | 0.0000 |
| 390 | 3 | 779.2920 | 0.0000 |
| 391 | 3 | 779.2935 | 0.0002 |
| 392 | 2 | 779.3075 | 0.0000 |
| 393 | 3 | 779.3134 | 0.0000 |
| 394 | 3 | 779.3235 | 0.0002 |
| 395 | 3 | 779.3296 | 0.0000 |
| 396 | 3 | 779.3322 | 0.0001 |
| 397 | 2 | 779.3380 | 0.0000 |
| 398 | 3 | 779.3483 | 0.0003 |
| 399 | 1 | 779.3501 | 0.0001 |
| 400 | 3 | 779.3614 | 0.0000 |
| 401 | 3 | 779.3827 | 0.0000 |
| 402 | 1 | 779.3838 | 0.0000 |
| 403 | 5 | 779.3862 | 0.0000 |
| 404 | 3 | 779.3867 | 0.0000 |
| 405 | 3 | 779.3939 | 0.0000 |
| 406 | 3 | 779.4081 | 0.0000 |
| 407 | 3 | 779.4281 | 0.0001 |
| 408 | 2 | 779.4291 | 0.0000 |
| 409 | 3 | 779.4325 | 0.0000 |
| 410 | 1 | 779.4460 | 0.0000 |
| 411 | 3 | 779.4475 | 0.0000 |
| 412 | 2 | 779.4581 | 0.0000 |
| 413 | 3 | 779.4609 | 0.0000 |
| 414 | 2 | 779.4634 | 0.0000 |
| 415 | 1 | 779.4661 | 0.0000 |
| 416 | 3 | 779.4699 | 0.0000 |
| 417 | 1 | 779.4726 | 0.0000 |
| 418 | 3 | 779.4934 | 0.0000 |
| 419 | 3 | 779.5035 | 0.0000 |
| 420 | 3 | 779.5065 | 0.0000 |
| 421 | 1 | 779.5257 | 0.0000 |
| 422 | 3 | 779.5421 | 0.0000 |
| 423 | 3 | 779.5479 | 0.0000 |
| 424 | 2 | 779.5499 | 0.0000 |
| 425 | 3 | 779.5555 | 0.0000 |
| 426 | 4 | 779.5576 | 0.0000 |
| 427 | 2 | 779.5809 | 0.0000 |
| 428 | 1 | 779.5991 | 0.0000 |
| 429 | 3 | 779.6024 | 0.0000 |
| 430 | 2 | 779.6092 | 0.0000 |
| 431 | 3 | 779.6221 | 0.0000 |
| 432 | 1 | 779.6358 | 0.0000 |
| 433 | 3 | 779.6424 | 0.0000 |
| 434 | 3 | 779.6566 | 0.0001 |
| 435 | 2 | 779.6665 | 0.0000 |
| 436 | 3 | 779.6706 | 0.0001 |
| 437 | 1 | 779.6731 | 0.0000 |
| 438 | 3 | 779.6736 | 0.0000 |
| 439 | 3 | 779.6932 | 0.0001 |
| 440 | 3 | 779.7036 | 0.0001 |
| 441 | 3 | 779.7141 | 0.0000 |
| 442 | 3 | 779.7244 | 0.0000 |
| 443 | 3 | 779.7364 | 0.0000 |
| 444 | 1 | 779.7410 | 0.0000 |
| 445 | 2 | 779.7443 | 0.0000 |
| 446 | 3 | 779.7515 | 0.0000 |
| 447 | 1 | 779.7565 | 0.0000 |
| 448 | 3 | 779.7625 | 0.0000 |
| 449 | 3 | 779.7819 | 0.0000 |



|     |   |          |        |
|-----|---|----------|--------|
| 450 | 2 | 779.7981 | 0.0000 |
| 451 | 1 | 779.8025 | 0.0000 |
| 452 | 3 | 779.8033 | 0.0000 |
| 453 | 3 | 779.8087 | 0.0001 |
| 454 | 1 | 779.8284 | 0.0000 |
| 455 | 3 | 779.8291 | 0.0002 |
| 456 | 2 | 779.8334 | 0.0001 |
| 457 | 3 | 779.8441 | 0.0000 |
| 458 | 3 | 779.8462 | 0.0001 |
| 459 | 3 | 779.8606 | 0.0000 |
| 460 | 1 | 779.8645 | 0.0002 |
| 461 | 3 | 779.8648 | 0.0000 |
| 462 | 2 | 779.8776 | 0.0000 |
| 463 | 3 | 779.8842 | 0.0000 |
| 464 | 3 | 779.9046 | 0.0001 |
| 465 | 1 | 779.9105 | 0.0000 |
| 466 | 5 | 779.9141 | 0.0000 |
| 467 | 2 | 779.9308 | 0.0000 |
| 468 | 3 | 779.9312 | 0.0001 |
| 469 | 3 | 779.9354 | 0.0000 |
| 470 | 3 | 779.9427 | 0.0000 |
| 471 | 3 | 779.9665 | 0.0000 |
| 472 | 3 | 779.9782 | 0.0000 |
| 473 | 2 | 779.9820 | 0.0000 |
| 474 | 3 | 779.9987 | 0.0000 |
| 475 | 1 | 780.0129 | 0.0001 |
| 476 | 2 | 780.0217 | 0.0000 |
| 477 | 3 | 780.0280 | 0.0000 |
| 478 | 3 | 780.0378 | 0.0000 |
| 479 | 3 | 780.0492 | 0.0000 |
| 480 | 2 | 780.0496 | 0.0000 |
| 481 | 3 | 780.0543 | 0.0000 |
| 482 | 1 | 780.0829 | 0.0000 |
| 483 | 1 | 780.0915 | 0.0000 |
| 484 | 3 | 780.0958 | 0.0000 |
| 485 | 3 | 780.0994 | 0.0000 |
| 486 | 2 | 780.1098 | 0.0000 |
| 487 | 3 | 780.1115 | 0.0000 |
| 488 | 1 | 780.1257 | 0.0000 |
| 489 | 3 | 780.1391 | 0.0000 |
| 490 | 3 | 780.1484 | 0.0000 |
| 491 | 2 | 780.1490 | 0.0000 |
| 492 | 3 | 780.1613 | 0.0000 |
| 493 | 3 | 780.1782 | 0.0000 |
| 494 | 3 | 780.1796 | 0.0000 |
| 495 | 3 | 780.1943 | 0.0000 |
| 496 | 2 | 780.2097 | 0.0000 |
| 497 | 3 | 780.2164 | 0.0000 |
| 498 | 1 | 780.2197 | 0.0002 |
| 499 | 2 | 780.2214 | 0.0000 |
| 500 | 3 | 780.2418 | 0.0000 |
| 501 | 3 | 780.2450 | 0.0000 |
| 502 | 1 | 780.2514 | 0.0000 |
| 503 | 3 | 780.2534 | 0.0000 |
| 504 | 1 | 780.2722 | 0.0000 |
| 505 | 3 | 780.2763 | 0.0000 |
| 506 | 3 | 780.2774 | 0.0000 |
| 507 | 1 | 780.2923 | 0.0000 |
| 508 | 3 | 780.2953 | 0.0001 |
| 509 | 3 | 780.3069 | 0.0000 |
| 510 | 2 | 780.3071 | 0.0000 |
| 511 | 3 | 780.3213 | 0.0000 |
| 512 | 2 | 780.3290 | 0.0000 |
| 513 | 3 | 780.3385 | 0.0000 |
| 514 | 1 | 780.3514 | 0.0000 |
| 515 | 3 | 780.3536 | 0.0000 |
| 516 | 3 | 780.3572 | 0.0000 |
| 517 | 2 | 780.3799 | 0.0000 |
| 518 | 3 | 780.3885 | 0.0000 |
| 519 | 3 | 780.3959 | 0.0000 |
| 520 | 3 | 780.4007 | 0.0000 |
| 521 | 1 | 780.4117 | 0.0000 |
| 522 | 2 | 780.4322 | 0.0000 |
| 523 | 3 | 780.4403 | 0.0000 |
| 524 | 3 | 780.4426 | 0.0000 |
| 525 | 3 | 780.4632 | 0.0000 |
| 526 | 1 | 780.4679 | 0.0000 |
| 527 | 2 | 780.4852 | 0.0000 |
| 528 | 3 | 780.4993 | 0.0000 |
| 529 | 3 | 780.5092 | 0.0000 |
| 530 | 1 | 780.5206 | 0.0000 |
| 531 | 2 | 780.5282 | 0.0000 |
| 532 | 3 | 780.5335 | 0.0000 |
| 533 | 2 | 780.5520 | 0.0000 |
| 534 | 1 | 780.5572 | 0.0000 |
| 535 | 3 | 780.5583 | 0.0001 |
| 536 | 3 | 780.5727 | 0.0000 |

|     |   |          |        |
|-----|---|----------|--------|
| 537 | 3 | 780.6047 | 0.0000 |
| 538 | 3 | 780.6350 | 0.0000 |
| 539 | 1 | 780.6465 | 0.0000 |
| 540 | 3 | 780.6626 | 0.0000 |
| 541 | 3 | 780.6757 | 0.0000 |
| 542 | 2 | 780.7222 | 0.0000 |
| 543 | 3 | 780.7228 | 0.0000 |
| 544 | 3 | 780.8358 | 0.0000 |
| 545 | 1 | 780.8604 | 0.0000 |
| 546 | 3 | 780.8640 | 0.0000 |
| 547 | 3 | 780.8919 | 0.0000 |
| 548 | 2 | 780.8980 | 0.0000 |
| 549 | 3 | 780.9364 | 0.0001 |
| 550 | 2 | 780.9577 | 0.0000 |
| 551 | 1 | 780.9757 | 0.0001 |
| 552 | 3 | 780.9840 | 0.0000 |
| 553 | 3 | 781.0568 | 0.0000 |
| 554 | 3 | 781.0679 | 0.0001 |
| 555 | 1 | 781.0868 | 0.0000 |
| 556 | 2 | 781.0913 | 0.0000 |
| 557 | 3 | 781.1057 | 0.0000 |
| 558 | 3 | 781.1156 | 0.0000 |
| 559 | 3 | 781.1170 | 0.0000 |
| 560 | 1 | 781.1329 | 0.0000 |
| 561 | 2 | 781.1640 | 0.0000 |
| 562 | 1 | 781.1739 | 0.0000 |
| 563 | 3 | 781.1883 | 0.0000 |
| 564 | 6 | 781.2118 | 0.0000 |
| 565 | 1 | 781.2121 | 0.0000 |
| 566 | 2 | 781.2432 | 0.0000 |
| 567 | 3 | 781.2511 | 0.0001 |
| 568 | 3 | 781.2762 | 0.0000 |
| 569 | 3 | 781.3110 | 0.0000 |
| 570 | 3 | 781.3128 | 0.0000 |
| 571 | 2 | 781.3615 | 0.0000 |
| 572 | 3 | 781.4246 | 0.0000 |
| 573 | 2 | 781.4424 | 0.0000 |
| 574 | 3 | 781.4491 | 0.0000 |
| 575 | 1 | 781.4669 | 0.0000 |
| 576 | 3 | 781.4741 | 0.0000 |
| 577 | 3 | 781.4787 | 0.0000 |
| 578 | 1 | 781.4918 | 0.0001 |
| 579 | 3 | 781.6059 | 0.0000 |
| 580 | 3 | 781.9718 | 0.0000 |
| 581 | 2 | 782.0432 | 0.0000 |
| 582 | 3 | 782.2533 | 0.0000 |
| 583 | 1 | 782.4217 | 0.0000 |
| 584 | 3 | 782.5189 | 0.0000 |
| 585 | 3 | 782.5274 | 0.0001 |
| 586 | 3 | 782.5655 | 0.0000 |
| 587 | 2 | 782.6053 | 0.0000 |
| 588 | 3 | 782.6320 | 0.0000 |
| 589 | 2 | 782.6468 | 0.0000 |
| 590 | 3 | 782.6511 | 0.0000 |
| 591 | 3 | 782.9640 | 0.0000 |
| 592 | 1 | 782.9735 | 0.0001 |
| 593 | 3 | 783.0554 | 0.0000 |
| 594 | 2 | 783.1852 | 0.0000 |
| 595 | 3 | 783.1907 | 0.0000 |
| 596 | 2 | 783.3680 | 0.0000 |
| 597 | 3 | 783.4177 | 0.0001 |
| 598 | 3 | 783.4250 | 0.0000 |
| 599 | 1 | 783.5722 | 0.0000 |
| 600 | 3 | 783.6528 | 0.0000 |
| 601 | 3 | 783.6697 | 0.0001 |
| 602 | 1 | 783.6750 | 0.0002 |

**Table S6** Numerical values for the multiplet energy levels, degeneracies and oscillator strength calculated for the  $5d^{10}5f^2 \rightarrow 5d^95f^3$  transitions of  $U^{4+}$  in  $UO_2$  represented graphically in Figure 7.

| #  | Multiplicity | Energy levels [eV] | Oscillator strength [-] |
|----|--------------|--------------------|-------------------------|
| 1  | 3            | 89.3016            | 0.0000                  |
| 2  | 2            | 89.3950            | 0.0000                  |
| 3  | 3            | 89.4139            | 0.0000                  |
| 4  | 1            | 89.4212            | 0.0001                  |
| 5  | 1            | 89.4595            | 0.0000                  |
| 6  | 3            | 89.4926            | 0.0000                  |
| 7  | 3            | 89.5334            | 0.0001                  |
| 8  | 2            | 89.5924            | 0.0000                  |
| 9  | 3            | 89.6226            | 0.0000                  |
| 10 | 3            | 89.6384            | 0.0000                  |
| 11 | 3            | 89.7013            | 0.0000                  |
| 12 | 2            | 89.7694            | 0.0000                  |
| 13 | 3            | 89.7784            | 0.0000                  |

|     |   |         |        |
|-----|---|---------|--------|
| 14  | 1 | 89.8803 | 0.0000 |
| 15  | 3 | 89.8940 | 0.0000 |
| 16  | 2 | 89.8992 | 0.0000 |
| 17  | 3 | 89.9065 | 0.0000 |
| 18  | 3 | 89.9098 | 0.0000 |
| 19  | 1 | 89.9575 | 0.0000 |
| 20  | 3 | 89.9908 | 0.0000 |
| 21  | 2 | 90.0138 | 0.0000 |
| 22  | 3 | 90.0267 | 0.0000 |
| 23  | 1 | 90.1196 | 0.0000 |
| 24  | 3 | 90.2260 | 0.0001 |
| 25  | 3 | 90.2334 | 0.0000 |
| 26  | 2 | 90.2753 | 0.0001 |
| 27  | 3 | 90.2797 | 0.0001 |
| 28  | 3 | 90.3305 | 0.0000 |
| 29  | 3 | 90.3452 | 0.0000 |
| 30  | 3 | 90.3580 | 0.0000 |
| 31  | 2 | 90.3639 | 0.0000 |
| 32  | 1 | 90.3893 | 0.0000 |
| 33  | 3 | 90.4069 | 0.0000 |
| 34  | 3 | 90.4072 | 0.0000 |
| 35  | 1 | 90.4109 | 0.0000 |
| 36  | 3 | 90.4423 | 0.0000 |
| 37  | 2 | 90.4429 | 0.0000 |
| 38  | 3 | 90.4554 | 0.0000 |
| 39  | 1 | 90.4729 | 0.0000 |
| 40  | 1 | 90.4747 | 0.0000 |
| 41  | 3 | 90.4971 | 0.0000 |
| 42  | 2 | 90.4974 | 0.0000 |
| 43  | 3 | 90.5080 | 0.0000 |
| 44  | 3 | 90.5363 | 0.0000 |
| 45  | 1 | 90.5966 | 0.0000 |
| 46  | 3 | 90.6089 | 0.0000 |
| 47  | 2 | 90.6188 | 0.0001 |
| 48  | 1 | 90.6378 | 0.0001 |
| 49  | 3 | 90.6774 | 0.0000 |
| 50  | 3 | 90.6799 | 0.0000 |
| 51  | 3 | 90.7030 | 0.0000 |
| 52  | 2 | 90.7092 | 0.0000 |
| 53  | 3 | 90.7318 | 0.0000 |
| 54  | 3 | 90.7463 | 0.0000 |
| 55  | 1 | 90.7480 | 0.0000 |
| 56  | 1 | 90.7588 | 0.0000 |
| 57  | 2 | 90.7746 | 0.0000 |
| 58  | 1 | 90.7817 | 0.0000 |
| 59  | 3 | 90.7839 | 0.0000 |
| 60  | 3 | 90.7864 | 0.0000 |
| 61  | 3 | 90.8003 | 0.0000 |
| 62  | 3 | 90.8193 | 0.0000 |
| 63  | 3 | 90.8202 | 0.0000 |
| 64  | 3 | 90.8232 | 0.0000 |
| 65  | 2 | 90.8314 | 0.0000 |
| 66  | 3 | 90.8379 | 0.0000 |
| 67  | 1 | 90.8460 | 0.0000 |
| 68  | 3 | 90.8537 | 0.0000 |
| 69  | 3 | 90.8755 | 0.0000 |
| 70  | 2 | 90.8772 | 0.0000 |
| 71  | 3 | 90.8974 | 0.0000 |
| 72  | 1 | 90.9000 | 0.0000 |
| 73  | 2 | 90.9013 | 0.0000 |
| 74  | 3 | 90.9167 | 0.0000 |
| 75  | 3 | 90.9252 | 0.0000 |
| 76  | 2 | 90.9299 | 0.0000 |
| 77  | 3 | 90.9310 | 0.0000 |
| 78  | 2 | 90.9337 | 0.0000 |
| 79  | 3 | 90.9343 | 0.0000 |
| 80  | 3 | 90.9423 | 0.0000 |
| 81  | 3 | 90.9629 | 0.0000 |
| 82  | 3 | 90.9665 | 0.0000 |
| 83  | 1 | 90.9731 | 0.0000 |
| 84  | 3 | 90.9901 | 0.0000 |
| 85  | 1 | 91.0297 | 0.0000 |
| 86  | 3 | 91.0358 | 0.0000 |
| 87  | 3 | 91.0426 | 0.0000 |
| 88  | 1 | 91.0611 | 0.0000 |
| 89  | 2 | 91.0686 | 0.0000 |
| 90  | 6 | 91.0730 | 0.0000 |
| 91  | 3 | 91.0782 | 0.0000 |
| 92  | 3 | 91.0906 | 0.0000 |
| 93  | 3 | 91.0912 | 0.0001 |
| 94  | 2 | 91.1082 | 0.0000 |
| 95  | 1 | 91.1099 | 0.0000 |
| 96  | 3 | 91.1169 | 0.0000 |
| 97  | 3 | 91.1229 | 0.0000 |
| 98  | 2 | 91.1238 | 0.0000 |
| 99  | 3 | 91.1540 | 0.0000 |
| 100 | 3 | 91.1572 | 0.0000 |

|     |   |         |        |
|-----|---|---------|--------|
| 101 | 1 | 91.1613 | 0.0000 |
| 102 | 2 | 91.1771 | 0.0000 |
| 103 | 3 | 91.1828 | 0.0000 |
| 104 | 3 | 91.1978 | 0.0000 |
| 105 | 2 | 91.2073 | 0.0000 |
| 106 | 3 | 91.2208 | 0.0000 |
| 107 | 2 | 91.2267 | 0.0000 |
| 108 | 3 | 91.2308 | 0.0000 |
| 109 | 3 | 91.2387 | 0.0000 |
| 110 | 3 | 91.2520 | 0.0000 |
| 111 | 2 | 91.2607 | 0.0000 |
| 112 | 3 | 91.2654 | 0.0000 |
| 113 | 3 | 91.2679 | 0.0000 |
| 114 | 1 | 91.2738 | 0.0000 |
| 115 | 2 | 91.3053 | 0.0000 |
| 116 | 1 | 91.3076 | 0.0000 |
| 117 | 1 | 91.3133 | 0.0000 |
| 118 | 3 | 91.3240 | 0.0001 |
| 119 | 3 | 91.3317 | 0.0000 |
| 120 | 3 | 91.3473 | 0.0000 |
| 121 | 3 | 91.3551 | 0.0000 |
| 122 | 2 | 91.3609 | 0.0000 |
| 123 | 1 | 91.3714 | 0.0000 |
| 124 | 2 | 91.3755 | 0.0000 |
| 125 | 3 | 91.3774 | 0.0000 |
| 126 | 3 | 91.3867 | 0.0000 |
| 127 | 3 | 91.3991 | 0.0000 |
| 128 | 1 | 91.3994 | 0.0000 |
| 129 | 2 | 91.4084 | 0.0000 |
| 130 | 3 | 91.4140 | 0.0000 |
| 131 | 3 | 91.4345 | 0.0000 |
| 132 | 3 | 91.4349 | 0.0000 |
| 133 | 3 | 91.4442 | 0.0000 |
| 134 | 1 | 91.4557 | 0.0000 |
| 135 | 2 | 91.4566 | 0.0000 |
| 136 | 3 | 91.4694 | 0.0000 |
| 137 | 3 | 91.4793 | 0.0000 |
| 138 | 1 | 91.4846 | 0.0000 |
| 139 | 2 | 91.5188 | 0.0000 |
| 140 | 3 | 91.5294 | 0.0000 |
| 141 | 3 | 91.5475 | 0.0000 |
| 142 | 1 | 91.5512 | 0.0000 |
| 143 | 3 | 91.5602 | 0.0000 |
| 144 | 3 | 91.5694 | 0.0000 |
| 145 | 4 | 91.5791 | 0.0000 |
| 146 | 2 | 91.6045 | 0.0000 |
| 147 | 2 | 91.6085 | 0.0000 |
| 148 | 3 | 91.6146 | 0.0000 |
| 149 | 3 | 91.6244 | 0.0000 |
| 150 | 3 | 91.6382 | 0.0000 |
| 151 | 1 | 91.6388 | 0.0000 |
| 152 | 2 | 91.6445 | 0.0000 |
| 153 | 3 | 91.6593 | 0.0000 |
| 154 | 3 | 91.6618 | 0.0000 |
| 155 | 3 | 91.6835 | 0.0000 |
| 156 | 3 | 91.6880 | 0.0000 |
| 157 | 2 | 91.6982 | 0.0000 |
| 158 | 3 | 91.7206 | 0.0000 |
| 159 | 1 | 91.7356 | 0.0000 |
| 160 | 3 | 91.7399 | 0.0000 |
| 161 | 3 | 91.7428 | 0.0000 |
| 162 | 3 | 91.7487 | 0.0001 |
| 163 | 1 | 91.7605 | 0.0000 |
| 164 | 3 | 91.7721 | 0.0000 |
| 165 | 2 | 91.7773 | 0.0000 |
| 166 | 3 | 91.7982 | 0.0000 |
| 167 | 3 | 91.8024 | 0.0000 |
| 168 | 3 | 91.8098 | 0.0000 |
| 169 | 3 | 91.8380 | 0.0000 |
| 170 | 2 | 91.8469 | 0.0000 |
| 171 | 1 | 91.8483 | 0.0000 |
| 172 | 3 | 91.8532 | 0.0000 |
| 173 | 1 | 91.8575 | 0.0000 |
| 174 | 1 | 91.8631 | 0.0000 |
| 175 | 3 | 91.8665 | 0.0000 |
| 176 | 1 | 91.8692 | 0.0000 |
| 177 | 3 | 91.8700 | 0.0000 |
| 178 | 3 | 91.8733 | 0.0000 |
| 179 | 2 | 91.8746 | 0.0000 |
| 180 | 3 | 91.8913 | 0.0000 |
| 181 | 3 | 91.8999 | 0.0000 |
| 182 | 1 | 91.9074 | 0.0000 |
| 183 | 3 | 91.9077 | 0.0000 |
| 184 | 3 | 91.9116 | 0.0000 |
| 185 | 3 | 91.9235 | 0.0000 |
| 186 | 2 | 91.9285 | 0.0000 |
| 187 | 6 | 91.9340 | 0.0000 |

|     |   |         |        |
|-----|---|---------|--------|
| 188 | 3 | 91.9524 | 0.0000 |
| 189 | 3 | 91.9594 | 0.0000 |
| 190 | 3 | 91.9625 | 0.0000 |
| 191 | 2 | 91.9646 | 0.0000 |
| 192 | 1 | 91.9734 | 0.0000 |
| 193 | 3 | 91.9777 | 0.0000 |
| 194 | 3 | 91.9854 | 0.0000 |
| 195 | 3 | 91.9908 | 0.0000 |
| 196 | 3 | 91.9972 | 0.0000 |
| 197 | 2 | 92.0065 | 0.0000 |
| 198 | 3 | 92.0153 | 0.0000 |
| 199 | 5 | 92.0183 | 0.0000 |
| 200 | 1 | 92.0256 | 0.0000 |
| 201 | 3 | 92.0343 | 0.0000 |
| 202 | 1 | 92.0347 | 0.0000 |
| 203 | 3 | 92.0387 | 0.0000 |
| 204 | 3 | 92.0450 | 0.0000 |
| 205 | 2 | 92.0461 | 0.0000 |
| 206 | 1 | 92.0621 | 0.0000 |
| 207 | 2 | 92.0636 | 0.0000 |
| 208 | 3 | 92.0656 | 0.0000 |
| 209 | 3 | 92.0671 | 0.0000 |
| 210 | 3 | 92.0754 | 0.0000 |
| 211 | 3 | 92.0799 | 0.0000 |
| 212 | 1 | 92.0807 | 0.0000 |
| 213 | 3 | 92.0996 | 0.0000 |
| 214 | 2 | 92.1052 | 0.0000 |
| 215 | 3 | 92.1077 | 0.0000 |
| 216 | 1 | 92.1158 | 0.0000 |
| 217 | 1 | 92.1168 | 0.0000 |
| 218 | 3 | 92.1172 | 0.0000 |
| 219 | 3 | 92.1225 | 0.0000 |
| 220 | 3 | 92.1293 | 0.0000 |
| 221 | 3 | 92.1391 | 0.0000 |
| 222 | 2 | 92.1403 | 0.0000 |
| 223 | 2 | 92.1467 | 0.0000 |
| 224 | 1 | 92.1543 | 0.0000 |
| 225 | 3 | 92.1639 | 0.0000 |
| 226 | 3 | 92.1700 | 0.0000 |
| 227 | 3 | 92.1716 | 0.0000 |
| 228 | 1 | 92.1753 | 0.0000 |
| 229 | 2 | 92.1838 | 0.0000 |
| 230 | 3 | 92.1938 | 0.0001 |
| 231 | 1 | 92.2033 | 0.0000 |
| 232 | 3 | 92.2067 | 0.0000 |
| 233 | 2 | 92.2135 | 0.0000 |
| 234 | 3 | 92.2208 | 0.0000 |
| 235 | 3 | 92.2249 | 0.0000 |
| 236 | 1 | 92.2288 | 0.0000 |
| 237 | 3 | 92.2472 | 0.0000 |
| 238 | 3 | 92.2502 | 0.0000 |
| 239 | 2 | 92.2513 | 0.0000 |
| 240 | 2 | 92.2616 | 0.0000 |
| 241 | 3 | 92.2645 | 0.0000 |
| 242 | 3 | 92.2679 | 0.0000 |
| 243 | 2 | 92.2897 | 0.0000 |
| 244 | 1 | 92.2923 | 0.0000 |
| 245 | 3 | 92.2938 | 0.0000 |
| 246 | 3 | 92.2951 | 0.0000 |
| 247 | 3 | 92.3008 | 0.0000 |
| 248 | 1 | 92.3024 | 0.0000 |
| 249 | 2 | 92.3171 | 0.0000 |
| 250 | 3 | 92.3183 | 0.0000 |
| 251 | 3 | 92.3262 | 0.0000 |
| 252 | 3 | 92.3285 | 0.0000 |
| 253 | 3 | 92.3360 | 0.0000 |
| 254 | 1 | 92.3369 | 0.0000 |
| 255 | 3 | 92.3370 | 0.0000 |
| 256 | 1 | 92.3391 | 0.0000 |
| 257 | 2 | 92.3603 | 0.0000 |
| 258 | 3 | 92.3641 | 0.0000 |
| 259 | 3 | 92.3754 | 0.0000 |
| 260 | 3 | 92.3936 | 0.0000 |
| 261 | 2 | 92.4005 | 0.0000 |
| 262 | 3 | 92.4210 | 0.0000 |
| 263 | 3 | 92.4274 | 0.0000 |
| 264 | 3 | 92.4324 | 0.0000 |
| 265 | 3 | 92.4393 | 0.0000 |
| 266 | 1 | 92.4409 | 0.0000 |
| 267 | 2 | 92.4415 | 0.0000 |
| 268 | 3 | 92.4530 | 0.0000 |
| 269 | 3 | 92.4540 | 0.0000 |
| 270 | 2 | 92.4552 | 0.0000 |
| 271 | 1 | 92.4625 | 0.0000 |
| 272 | 2 | 92.4771 | 0.0000 |
| 273 | 3 | 92.4780 | 0.0000 |
| 274 | 3 | 92.4794 | 0.0000 |

|     |   |         |        |
|-----|---|---------|--------|
| 275 | 1 | 92.4864 | 0.0000 |
| 276 | 3 | 92.4931 | 0.0000 |
| 277 | 1 | 92.4965 | 0.0000 |
| 278 | 3 | 92.5014 | 0.0000 |
| 279 | 1 | 92.5048 | 0.0000 |
| 280 | 2 | 92.5132 | 0.0000 |
| 281 | 3 | 92.5160 | 0.0000 |
| 282 | 3 | 92.5213 | 0.0000 |
| 283 | 3 | 92.5227 | 0.0000 |
| 284 | 3 | 92.5289 | 0.0000 |
| 285 | 2 | 92.5469 | 0.0000 |
| 286 | 3 | 92.5516 | 0.0000 |
| 287 | 1 | 92.5531 | 0.0000 |
| 288 | 3 | 92.5593 | 0.0000 |
| 289 | 3 | 92.5671 | 0.0000 |
| 290 | 3 | 92.5803 | 0.0000 |
| 291 | 3 | 92.5909 | 0.0000 |
| 292 | 1 | 92.5918 | 0.0000 |
| 293 | 3 | 92.5951 | 0.0000 |
| 294 | 2 | 92.5960 | 0.0000 |
| 295 | 3 | 92.6043 | 0.0000 |
| 296 | 3 | 92.6087 | 0.0000 |
| 297 | 1 | 92.6169 | 0.0000 |
| 298 | 3 | 92.6171 | 0.0000 |
| 299 | 3 | 92.6212 | 0.0000 |
| 300 | 3 | 92.6270 | 0.0000 |
| 301 | 3 | 92.6352 | 0.0000 |
| 302 | 2 | 92.6356 | 0.0000 |
| 303 | 4 | 92.6362 | 0.0000 |
| 304 | 1 | 92.6467 | 0.0000 |
| 305 | 3 | 92.6514 | 0.0000 |
| 306 | 2 | 92.6553 | 0.0000 |
| 307 | 2 | 92.6670 | 0.0000 |
| 308 | 3 | 92.6744 | 0.0000 |
| 309 | 3 | 92.6801 | 0.0000 |
| 310 | 3 | 92.6958 | 0.0000 |
| 311 | 3 | 92.7039 | 0.0000 |
| 312 | 3 | 92.7086 | 0.0000 |
| 313 | 3 | 92.7158 | 0.0000 |
| 314 | 1 | 92.7217 | 0.0000 |
| 315 | 3 | 92.7296 | 0.0000 |
| 316 | 1 | 92.7388 | 0.0000 |
| 317 | 1 | 92.7477 | 0.0000 |
| 318 | 3 | 92.7537 | 0.0000 |
| 319 | 3 | 92.7550 | 0.0000 |
| 320 | 3 | 92.7616 | 0.0000 |
| 321 | 2 | 92.7645 | 0.0000 |
| 322 | 1 | 92.7727 | 0.0000 |
| 323 | 2 | 92.7838 | 0.0000 |
| 324 | 3 | 92.7896 | 0.0000 |
| 325 | 3 | 92.7939 | 0.0000 |
| 326 | 1 | 92.7950 | 0.0000 |
| 327 | 3 | 92.7978 | 0.0000 |
| 328 | 3 | 92.8065 | 0.0000 |
| 329 | 2 | 92.8153 | 0.0000 |
| 330 | 3 | 92.8178 | 0.0000 |
| 331 | 3 | 92.8209 | 0.0000 |
| 332 | 1 | 92.8270 | 0.0000 |
| 333 | 2 | 92.8274 | 0.0000 |
| 334 | 3 | 92.8432 | 0.0000 |
| 335 | 3 | 92.8523 | 0.0000 |
| 336 | 3 | 92.8601 | 0.0000 |
| 337 | 2 | 92.8637 | 0.0000 |
| 338 | 3 | 92.8915 | 0.0000 |
| 339 | 3 | 92.8986 | 0.0000 |
| 340 | 3 | 92.8991 | 0.0000 |
| 341 | 3 | 92.9048 | 0.0000 |
| 342 | 2 | 92.9056 | 0.0000 |
| 343 | 1 | 92.9096 | 0.0000 |
| 344 | 1 | 92.9145 | 0.0000 |
| 345 | 3 | 92.9213 | 0.0000 |
| 346 | 3 | 92.9366 | 0.0000 |
| 347 | 3 | 92.9467 | 0.0000 |
| 348 | 1 | 92.9483 | 0.0000 |
| 349 | 1 | 92.9507 | 0.0000 |
| 350 | 2 | 92.9539 | 0.0000 |
| 351 | 3 | 92.9572 | 0.0000 |
| 352 | 2 | 92.9853 | 0.0000 |
| 353 | 3 | 92.9868 | 0.0000 |
| 354 | 1 | 92.9925 | 0.0000 |
| 355 | 3 | 92.9973 | 0.0000 |
| 356 | 3 | 93.0088 | 0.0000 |
| 357 | 1 | 93.0143 | 0.0000 |
| 358 | 3 | 93.0207 | 0.0000 |
| 359 | 3 | 93.0256 | 0.0000 |
| 360 | 2 | 93.0368 | 0.0000 |
| 361 | 3 | 93.0407 | 0.0000 |

|     |   |         |        |
|-----|---|---------|--------|
| 362 | 2 | 93.0489 | 0.0000 |
| 363 | 1 | 93.0573 | 0.0000 |
| 364 | 3 | 93.0630 | 0.0000 |
| 365 | 3 | 93.0672 | 0.0000 |
| 366 | 2 | 93.0694 | 0.0000 |
| 367 | 3 | 93.0768 | 0.0000 |
| 368 | 3 | 93.0805 | 0.0000 |
| 369 | 3 | 93.0939 | 0.0000 |
| 370 | 3 | 93.0944 | 0.0000 |
| 371 | 1 | 93.1029 | 0.0000 |
| 372 | 3 | 93.1127 | 0.0000 |
| 373 | 1 | 93.1257 | 0.0000 |
| 374 | 2 | 93.1386 | 0.0000 |
| 375 | 3 | 93.1420 | 0.0000 |
| 376 | 3 | 93.1432 | 0.0000 |
| 377 | 3 | 93.1505 | 0.0000 |
| 378 | 3 | 93.1518 | 0.0000 |
| 379 | 2 | 93.1644 | 0.0000 |
| 380 | 3 | 93.1872 | 0.0000 |
| 381 | 3 | 93.1926 | 0.0000 |
| 382 | 2 | 93.1945 | 0.0000 |
| 383 | 1 | 93.2061 | 0.0000 |
| 384 | 1 | 93.2072 | 0.0000 |
| 385 | 3 | 93.2163 | 0.0000 |
| 386 | 3 | 93.2255 | 0.0000 |
| 387 | 2 | 93.2345 | 0.0000 |
| 388 | 3 | 93.2386 | 0.0000 |
| 389 | 3 | 93.2397 | 0.0001 |
| 390 | 3 | 93.2590 | 0.0000 |
| 391 | 3 | 93.2701 | 0.0000 |
| 392 | 3 | 93.2781 | 0.0000 |
| 393 | 3 | 93.2799 | 0.0000 |
| 394 | 2 | 93.2883 | 0.0000 |
| 395 | 1 | 93.3057 | 0.0000 |
| 396 | 3 | 93.3066 | 0.0000 |
| 397 | 3 | 93.3081 | 0.0000 |
| 398 | 2 | 93.3094 | 0.0000 |
| 399 | 3 | 93.3131 | 0.0000 |
| 400 | 2 | 93.3338 | 0.0000 |
| 401 | 3 | 93.3401 | 0.0000 |
| 402 | 3 | 93.3492 | 0.0000 |
| 403 | 1 | 93.3559 | 0.0000 |
| 404 | 3 | 93.3616 | 0.0000 |
| 405 | 1 | 93.3820 | 0.0000 |
| 406 | 3 | 93.3838 | 0.0000 |
| 407 | 2 | 93.3854 | 0.0000 |
| 408 | 3 | 93.3873 | 0.0000 |
| 409 | 1 | 93.3987 | 0.0000 |
| 410 | 3 | 93.4002 | 0.0000 |
| 411 | 2 | 93.4077 | 0.0000 |
| 412 | 3 | 93.4188 | 0.0000 |
| 413 | 1 | 93.4230 | 0.0000 |
| 414 | 3 | 93.4302 | 0.0000 |
| 415 | 3 | 93.4328 | 0.0001 |
| 416 | 3 | 93.4372 | 0.0000 |
| 417 | 2 | 93.4401 | 0.0000 |
| 418 | 3 | 93.4565 | 0.0000 |
| 419 | 3 | 93.4731 | 0.0000 |
| 420 | 3 | 93.4771 | 0.0000 |
| 421 | 1 | 93.4851 | 0.0000 |
| 422 | 2 | 93.4872 | 0.0000 |
| 423 | 3 | 93.4977 | 0.0000 |
| 424 | 2 | 93.4984 | 0.0000 |
| 425 | 3 | 93.5050 | 0.0000 |
| 426 | 2 | 93.5193 | 0.0000 |
| 427 | 1 | 93.5257 | 0.0000 |
| 428 | 3 | 93.5317 | 0.0000 |
| 429 | 3 | 93.5324 | 0.0000 |
| 430 | 3 | 93.5410 | 0.0000 |
| 431 | 3 | 93.5429 | 0.0000 |
| 432 | 3 | 93.5471 | 0.0000 |
| 433 | 2 | 93.5524 | 0.0000 |
| 434 | 3 | 93.5678 | 0.0000 |
| 435 | 3 | 93.5726 | 0.0000 |
| 436 | 3 | 93.5863 | 0.0001 |
| 437 | 3 | 93.5865 | 0.0000 |
| 438 | 2 | 93.5954 | 0.0000 |
| 439 | 2 | 93.6041 | 0.0001 |
| 440 | 3 | 93.6085 | 0.0002 |
| 441 | 2 | 93.6133 | 0.0000 |
| 442 | 3 | 93.6192 | 0.0000 |
| 443 | 2 | 93.6198 | 0.0001 |
| 444 | 3 | 93.6401 | 0.0000 |
| 445 | 3 | 93.6465 | 0.0000 |
| 446 | 3 | 93.6495 | 0.0000 |
| 447 | 3 | 93.6537 | 0.0000 |
| 448 | 4 | 93.6678 | 0.0000 |

|     |   |         |        |
|-----|---|---------|--------|
| 449 | 2 | 93.6686 | 0.0000 |
| 450 | 3 | 93.6707 | 0.0000 |
| 451 | 3 | 93.6731 | 0.0001 |
| 452 | 1 | 93.6778 | 0.0000 |
| 453 | 3 | 93.6806 | 0.0000 |
| 454 | 1 | 93.6863 | 0.0000 |
| 455 | 3 | 93.6946 | 0.0000 |
| 456 | 2 | 93.6949 | 0.0001 |
| 457 | 3 | 93.6980 | 0.0000 |
| 458 | 3 | 93.7113 | 0.0000 |
| 459 | 1 | 93.7133 | 0.0000 |
| 460 | 2 | 93.7146 | 0.0000 |
| 461 | 3 | 93.7260 | 0.0000 |
| 462 | 3 | 93.7382 | 0.0000 |
| 463 | 2 | 93.7401 | 0.0000 |
| 464 | 3 | 93.7416 | 0.0000 |
| 465 | 2 | 93.7503 | 0.0000 |
| 466 | 1 | 93.7510 | 0.0000 |
| 467 | 3 | 93.7530 | 0.0001 |
| 468 | 1 | 93.7553 | 0.0000 |
| 469 | 3 | 93.7761 | 0.0000 |
| 470 | 3 | 93.7898 | 0.0000 |
| 471 | 3 | 93.7905 | 0.0000 |
| 472 | 2 | 93.7933 | 0.0000 |
| 473 | 3 | 93.7988 | 0.0000 |
| 474 | 2 | 93.8014 | 0.0000 |
| 475 | 3 | 93.8103 | 0.0000 |
| 476 | 1 | 93.8109 | 0.0001 |
| 477 | 3 | 93.8190 | 0.0000 |
| 478 | 3 | 93.8288 | 0.0000 |
| 479 | 3 | 93.8326 | 0.0000 |
| 480 | 3 | 93.8470 | 0.0000 |
| 481 | 3 | 93.8524 | 0.0000 |
| 482 | 1 | 93.8536 | 0.0000 |
| 483 | 3 | 93.8607 | 0.0000 |
| 484 | 1 | 93.8710 | 0.0000 |
| 485 | 1 | 93.8894 | 0.0000 |
| 486 | 3 | 93.8977 | 0.0002 |
| 487 | 3 | 93.9039 | 0.0000 |
| 488 | 3 | 93.9087 | 0.0000 |
| 489 | 2 | 93.9109 | 0.0001 |
| 490 | 3 | 93.9179 | 0.0000 |
| 491 | 3 | 93.9208 | 0.0003 |
| 492 | 1 | 93.9358 | 0.0000 |
| 493 | 3 | 93.9383 | 0.0000 |
| 494 | 3 | 93.9484 | 0.0002 |
| 495 | 1 | 93.9675 | 0.0000 |
| 496 | 3 | 93.9884 | 0.0000 |
| 497 | 2 | 93.9885 | 0.0000 |
| 498 | 1 | 94.0010 | 0.0000 |
| 499 | 3 | 94.0035 | 0.0000 |
| 500 | 3 | 94.0067 | 0.0001 |
| 501 | 3 | 94.0099 | 0.0000 |
| 502 | 3 | 94.0215 | 0.0000 |
| 503 | 3 | 94.0275 | 0.0001 |
| 504 | 3 | 94.0411 | 0.0000 |
| 505 | 2 | 94.0462 | 0.0000 |
| 506 | 3 | 94.0506 | 0.0000 |
| 507 | 3 | 94.0609 | 0.0000 |
| 508 | 1 | 94.0614 | 0.0000 |
| 509 | 3 | 94.0859 | 0.0001 |
| 510 | 1 | 94.0865 | 0.0000 |
| 511 | 2 | 94.0885 | 0.0000 |
| 512 | 2 | 94.1081 | 0.0000 |
| 513 | 3 | 94.1158 | 0.0000 |
| 514 | 3 | 94.1185 | 0.0000 |
| 515 | 3 | 94.1250 | 0.0000 |
| 516 | 3 | 94.1385 | 0.0000 |
| 517 | 3 | 94.1425 | 0.0000 |
| 518 | 1 | 94.1551 | 0.0000 |
| 519 | 2 | 94.1626 | 0.0000 |
| 520 | 1 | 94.1710 | 0.0000 |
| 521 | 3 | 94.1765 | 0.0000 |
| 522 | 3 | 94.1846 | 0.0000 |
| 523 | 2 | 94.1954 | 0.0000 |
| 524 | 3 | 94.1960 | 0.0000 |
| 525 | 1 | 94.2089 | 0.0000 |
| 526 | 3 | 94.2218 | 0.0001 |
| 527 | 3 | 94.2229 | 0.0000 |
| 528 | 1 | 94.2400 | 0.0001 |
| 529 | 3 | 94.2413 | 0.0000 |
| 530 | 2 | 94.2492 | 0.0000 |
| 531 | 3 | 94.2502 | 0.0000 |
| 532 | 3 | 94.2702 | 0.0001 |
| 533 | 3 | 94.2741 | 0.0000 |
| 534 | 3 | 94.2935 | 0.0003 |
| 535 | 3 | 94.2998 | 0.0000 |



|     |   |         |        |
|-----|---|---------|--------|
| 536 | 1 | 94.3021 | 0.0001 |
| 537 | 2 | 94.3033 | 0.0000 |
| 538 | 3 | 94.3168 | 0.0000 |
| 539 | 1 | 94.3172 | 0.0000 |
| 540 | 2 | 94.3187 | 0.0000 |
| 541 | 3 | 94.3203 | 0.0000 |
| 542 | 2 | 94.3217 | 0.0000 |
| 543 | 3 | 94.3307 | 0.0001 |
| 544 | 3 | 94.3390 | 0.0000 |
| 545 | 3 | 94.3582 | 0.0001 |
| 546 | 2 | 94.3588 | 0.0000 |
| 547 | 3 | 94.3614 | 0.0001 |
| 548 | 1 | 94.3685 | 0.0001 |
| 549 | 1 | 94.3852 | 0.0000 |
| 550 | 3 | 94.3854 | 0.0000 |
| 551 | 3 | 94.4004 | 0.0000 |
| 552 | 2 | 94.4059 | 0.0001 |
| 553 | 3 | 94.4155 | 0.0000 |
| 554 | 3 | 94.4191 | 0.0000 |
| 555 | 1 | 94.4259 | 0.0000 |
| 556 | 3 | 94.4294 | 0.0001 |
| 557 | 1 | 94.4309 | 0.0000 |
| 558 | 2 | 94.4363 | 0.0000 |
| 559 | 1 | 94.4476 | 0.0000 |
| 560 | 3 | 94.4484 | 0.0000 |
| 561 | 3 | 94.4677 | 0.0002 |
| 562 | 2 | 94.4782 | 0.0002 |
| 563 | 3 | 94.4835 | 0.0000 |
| 564 | 3 | 94.4934 | 0.0000 |
| 565 | 2 | 94.4937 | 0.0000 |
| 566 | 1 | 94.4991 | 0.0000 |
| 567 | 3 | 94.5065 | 0.0000 |
| 568 | 1 | 94.5103 | 0.0000 |
| 569 | 3 | 94.5139 | 0.0000 |
| 570 | 3 | 94.5166 | 0.0000 |
| 571 | 3 | 94.5231 | 0.0001 |
| 572 | 3 | 94.5247 | 0.0000 |
| 573 | 2 | 94.5421 | 0.0000 |
| 574 | 3 | 94.5550 | 0.0000 |
| 575 | 1 | 94.5577 | 0.0000 |
| 576 | 3 | 94.5630 | 0.0000 |
| 577 | 3 | 94.5712 | 0.0000 |
| 578 | 3 | 94.5738 | 0.0001 |
| 579 | 2 | 94.5793 | 0.0000 |
| 580 | 2 | 94.5921 | 0.0001 |
| 581 | 3 | 94.5924 | 0.0001 |
| 582 | 1 | 94.5930 | 0.0000 |
| 583 | 3 | 94.6027 | 0.0003 |
| 584 | 3 | 94.6220 | 0.0002 |
| 585 | 2 | 94.6238 | 0.0001 |
| 586 | 1 | 94.6263 | 0.0000 |
| 587 | 3 | 94.6269 | 0.0000 |
| 588 | 2 | 94.6369 | 0.0000 |
| 589 | 3 | 94.6702 | 0.0000 |
| 590 | 3 | 94.6745 | 0.0000 |
| 591 | 3 | 94.6901 | 0.0000 |
| 592 | 3 | 94.6950 | 0.0001 |
| 593 | 3 | 94.7015 | 0.0004 |
| 594 | 1 | 94.7081 | 0.0000 |
| 595 | 2 | 94.7152 | 0.0002 |
| 596 | 3 | 94.7218 | 0.0002 |
| 597 | 1 | 94.7241 | 0.0000 |
| 598 | 3 | 94.7448 | 0.0001 |
| 599 | 2 | 94.7521 | 0.0001 |
| 600 | 3 | 94.7617 | 0.0000 |
| 601 | 4 | 94.7718 | 0.0005 |
| 602 | 3 | 94.7783 | 0.0001 |
| 603 | 2 | 94.7842 | 0.0002 |
| 604 | 3 | 94.7876 | 0.0002 |
| 605 | 1 | 94.7914 | 0.0000 |
| 606 | 3 | 94.8006 | 0.0000 |
| 607 | 2 | 94.8246 | 0.0001 |
| 608 | 3 | 94.8262 | 0.0000 |
| 609 | 3 | 94.8286 | 0.0000 |
| 610 | 3 | 94.8381 | 0.0001 |
| 611 | 2 | 94.8504 | 0.0001 |
| 612 | 3 | 94.8675 | 0.0004 |
| 613 | 3 | 94.9030 | 0.0002 |
| 614 | 3 | 94.9050 | 0.0006 |
| 615 | 2 | 94.9190 | 0.0001 |
| 616 | 3 | 94.9242 | 0.0002 |
| 617 | 3 | 94.9288 | 0.0011 |
| 618 | 3 | 94.9442 | 0.0014 |
| 619 | 3 | 94.9555 | 0.0002 |
| 620 | 1 | 94.9561 | 0.0000 |
| 621 | 1 | 94.9596 | 0.0010 |
| 622 | 3 | 94.9676 | 0.0000 |

|     |   |         |        |
|-----|---|---------|--------|
| 623 | 2 | 94.9679 | 0.0010 |
| 624 | 1 | 94.9697 | 0.0001 |
| 625 | 2 | 94.9934 | 0.0000 |
| 626 | 3 | 94.9969 | 0.0001 |
| 627 | 3 | 95.0079 | 0.0001 |
| 628 | 1 | 95.0433 | 0.0000 |
| 629 | 3 | 95.0521 | 0.0001 |
| 630 | 1 | 95.0531 | 0.0000 |
| 631 | 3 | 95.0602 | 0.0001 |
| 632 | 3 | 95.0832 | 0.0020 |
| 633 | 2 | 95.0882 | 0.0003 |
| 634 | 1 | 95.0946 | 0.0003 |
| 635 | 3 | 95.1043 | 0.0001 |
| 636 | 3 | 95.1103 | 0.0006 |
| 637 | 1 | 95.1136 | 0.0000 |
| 638 | 3 | 95.1173 | 0.0001 |
| 639 | 3 | 95.1264 | 0.0025 |
| 640 | 2 | 95.1452 | 0.0001 |
| 641 | 3 | 95.1469 | 0.0000 |
| 642 | 3 | 95.1640 | 0.0007 |
| 643 | 1 | 95.1670 | 0.0000 |
| 644 | 3 | 95.1734 | 0.0001 |
| 645 | 2 | 95.1853 | 0.0014 |
| 646 | 3 | 95.2012 | 0.0001 |
| 647 | 3 | 95.2069 | 0.0003 |
| 648 | 1 | 95.2194 | 0.0000 |
| 649 | 3 | 95.2228 | 0.0002 |
| 650 | 2 | 95.2278 | 0.0004 |
| 651 | 3 | 95.2315 | 0.0000 |
| 652 | 3 | 95.2423 | 0.0003 |
| 653 | 3 | 95.2569 | 0.0000 |
| 654 | 3 | 95.2680 | 0.0001 |
| 655 | 2 | 95.2718 | 0.0004 |
| 656 | 3 | 95.2777 | 0.0004 |
| 657 | 1 | 95.2968 | 0.0000 |
| 658 | 2 | 95.2976 | 0.0002 |
| 659 | 1 | 95.3002 | 0.0000 |
| 660 | 3 | 95.3022 | 0.0000 |
| 661 | 3 | 95.3052 | 0.0003 |
| 662 | 2 | 95.3364 | 0.0000 |
| 663 | 3 | 95.3371 | 0.0004 |
| 664 | 1 | 95.3432 | 0.0000 |
| 665 | 3 | 95.3593 | 0.0000 |
| 666 | 3 | 95.3608 | 0.0003 |
| 667 | 3 | 95.3655 | 0.0000 |
| 668 | 3 | 95.3820 | 0.0006 |
| 669 | 2 | 95.4051 | 0.0002 |
| 670 | 3 | 95.4077 | 0.0002 |
| 671 | 3 | 95.4186 | 0.0000 |
| 672 | 3 | 95.4337 | 0.0003 |
| 673 | 2 | 95.4412 | 0.0000 |
| 674 | 3 | 95.4534 | 0.0002 |
| 675 | 3 | 95.4680 | 0.0000 |
| 676 | 1 | 95.4730 | 0.0003 |
| 677 | 2 | 95.4815 | 0.0000 |
| 678 | 3 | 95.5049 | 0.0003 |
| 679 | 1 | 95.5083 | 0.0000 |
| 680 | 3 | 95.5157 | 0.0001 |
| 681 | 3 | 95.5323 | 0.0000 |
| 682 | 3 | 95.5454 | 0.0000 |
| 683 | 3 | 95.5544 | 0.0000 |
| 684 | 1 | 95.5643 | 0.0000 |
| 685 | 3 | 95.5763 | 0.0002 |
| 686 | 3 | 95.5776 | 0.0004 |
| 687 | 2 | 95.5814 | 0.0001 |
| 688 | 2 | 95.6039 | 0.0000 |
| 689 | 3 | 95.6193 | 0.0000 |
| 690 | 3 | 95.6239 | 0.0006 |
| 691 | 2 | 95.6278 | 0.0002 |
| 692 | 1 | 95.6313 | 0.0000 |
| 693 | 1 | 95.6440 | 0.0001 |
| 694 | 3 | 95.6445 | 0.0000 |
| 695 | 3 | 95.6673 | 0.0001 |
| 696 | 2 | 95.6703 | 0.0001 |
| 697 | 3 | 95.6709 | 0.0004 |
| 698 | 1 | 95.7206 | 0.0002 |
| 699 | 3 | 95.7224 | 0.0000 |
| 700 | 2 | 95.7406 | 0.0001 |
| 701 | 3 | 95.7594 | 0.0000 |
| 702 | 3 | 95.7805 | 0.0020 |
| 703 | 2 | 95.7860 | 0.0024 |
| 704 | 3 | 95.7895 | 0.0024 |
| 705 | 3 | 95.7906 | 0.0001 |
| 706 | 3 | 95.8149 | 0.0001 |
| 707 | 3 | 95.8323 | 0.0001 |
| 708 | 3 | 95.8336 | 0.0001 |
| 709 | 3 | 95.8437 | 0.0000 |

|     |   |         |        |
|-----|---|---------|--------|
| 710 | 3 | 95.8593 | 0.0001 |
| 711 | 2 | 95.8602 | 0.0000 |
| 712 | 1 | 95.8704 | 0.0001 |
| 713 | 3 | 95.8719 | 0.0000 |
| 714 | 3 | 95.8733 | 0.0002 |
| 715 | 1 | 95.8758 | 0.0000 |
| 716 | 2 | 95.8995 | 0.0017 |
| 717 | 3 | 95.9097 | 0.0000 |
| 718 | 3 | 95.9209 | 0.0001 |
| 719 | 3 | 95.9438 | 0.0001 |
| 720 | 1 | 95.9464 | 0.0000 |
| 721 | 3 | 95.9604 | 0.0000 |
| 722 | 1 | 95.9608 | 0.0003 |
| 723 | 2 | 95.9845 | 0.0002 |
| 724 | 1 | 95.9855 | 0.0000 |
| 725 | 3 | 95.9874 | 0.0002 |
| 726 | 3 | 95.9894 | 0.0002 |
| 727 | 3 | 96.0024 | 0.0003 |
| 728 | 2 | 96.0245 | 0.0000 |
| 729 | 3 | 96.0278 | 0.0000 |
| 730 | 3 | 96.0359 | 0.0000 |
| 731 | 1 | 96.0424 | 0.0000 |
| 732 | 3 | 96.0483 | 0.0000 |
| 733 | 3 | 96.0503 | 0.0000 |
| 734 | 3 | 96.0785 | 0.0001 |
| 735 | 3 | 96.0820 | 0.0000 |
| 736 | 3 | 96.0930 | 0.0000 |
| 737 | 2 | 96.1055 | 0.0001 |
| 738 | 1 | 96.1081 | 0.0000 |
| 739 | 2 | 96.1136 | 0.0000 |
| 740 | 3 | 96.1295 | 0.0003 |
| 741 | 1 | 96.1351 | 0.0001 |
| 742 | 1 | 96.1462 | 0.0000 |
| 743 | 2 | 96.1489 | 0.0000 |
| 744 | 3 | 96.1561 | 0.0000 |
| 745 | 3 | 96.1628 | 0.0000 |
| 746 | 4 | 96.1768 | 0.0004 |
| 747 | 2 | 96.1850 | 0.0002 |
| 748 | 1 | 96.2165 | 0.0000 |
| 749 | 3 | 96.2173 | 0.0000 |
| 750 | 3 | 96.2239 | 0.0000 |
| 751 | 3 | 96.2304 | 0.0001 |
| 752 | 2 | 96.2432 | 0.0001 |
| 753 | 3 | 96.2510 | 0.0010 |
| 754 | 3 | 96.2574 | 0.0000 |
| 755 | 3 | 96.2853 | 0.0001 |
| 756 | 3 | 96.2935 | 0.0001 |
| 757 | 3 | 96.3048 | 0.0001 |
| 758 | 1 | 96.3088 | 0.0005 |
| 759 | 3 | 96.3254 | 0.0000 |
| 760 | 1 | 96.3382 | 0.0000 |
| 761 | 2 | 96.3430 | 0.0000 |
| 762 | 3 | 96.3779 | 0.0003 |
| 763 | 3 | 96.3795 | 0.0000 |
| 764 | 3 | 96.4171 | 0.0006 |
| 765 | 2 | 96.4226 | 0.0000 |
| 766 | 2 | 96.4254 | 0.0004 |
| 767 | 3 | 96.4256 | 0.0000 |
| 768 | 3 | 96.4530 | 0.0000 |
| 769 | 1 | 96.4811 | 0.0003 |
| 770 | 2 | 96.4874 | 0.0003 |
| 771 | 1 | 96.5052 | 0.0001 |
| 772 | 3 | 96.5083 | 0.0005 |
| 773 | 3 | 96.5148 | 0.0000 |
| 774 | 3 | 96.5235 | 0.0005 |
| 775 | 3 | 96.5783 | 0.0000 |
| 776 | 2 | 96.5808 | 0.0002 |
| 777 | 3 | 96.5876 | 0.0001 |
| 778 | 3 | 96.5942 | 0.0014 |
| 779 | 3 | 96.6056 | 0.0001 |
| 780 | 1 | 96.6117 | 0.0000 |
| 781 | 3 | 96.6247 | 0.0015 |
| 782 | 3 | 96.6361 | 0.0003 |
| 783 | 1 | 96.6591 | 0.0000 |
| 784 | 3 | 96.6705 | 0.0001 |
| 785 | 2 | 96.6794 | 0.0009 |
| 786 | 2 | 96.6890 | 0.0001 |
| 787 | 3 | 96.6933 | 0.0001 |
| 788 | 3 | 96.6987 | 0.0000 |
| 789 | 2 | 96.7269 | 0.0001 |
| 790 | 1 | 96.7347 | 0.0000 |
| 791 | 3 | 96.7373 | 0.0000 |
| 792 | 3 | 96.7702 | 0.0000 |
| 793 | 3 | 96.7930 | 0.0002 |
| 794 | 3 | 96.8120 | 0.0000 |
| 795 | 2 | 96.8184 | 0.0002 |
| 796 | 1 | 96.8195 | 0.0000 |

|     |   |         |        |
|-----|---|---------|--------|
| 797 | 3 | 96.8238 | 0.0000 |
| 798 | 3 | 96.8422 | 0.0000 |
| 799 | 2 | 96.8476 | 0.0004 |
| 800 | 3 | 96.8563 | 0.0000 |
| 801 | 1 | 96.8630 | 0.0001 |
| 802 | 3 | 96.8635 | 0.0000 |
| 803 | 1 | 96.8774 | 0.0000 |
| 804 | 3 | 96.8883 | 0.0001 |
| 805 | 3 | 96.9019 | 0.0000 |
| 806 | 2 | 96.9582 | 0.0022 |
| 807 | 3 | 96.9671 | 0.0000 |
| 808 | 3 | 96.9762 | 0.0004 |
| 809 | 2 | 96.9819 | 0.0004 |
| 810 | 3 | 97.0078 | 0.0010 |
| 811 | 3 | 97.0182 | 0.0000 |
| 812 | 3 | 97.0276 | 0.0003 |
| 813 | 1 | 97.0884 | 0.0000 |
| 814 | 2 | 97.0945 | 0.0001 |
| 815 | 1 | 97.1113 | 0.0000 |
| 816 | 3 | 97.1273 | 0.0003 |
| 817 | 3 | 97.1546 | 0.0003 |
| 818 | 3 | 97.2016 | 0.0001 |
| 819 | 2 | 97.2247 | 0.0000 |
| 820 | 3 | 97.2325 | 0.0000 |
| 821 | 3 | 97.2669 | 0.0008 |
| 822 | 1 | 97.2697 | 0.0000 |
| 823 | 3 | 97.2923 | 0.0004 |
| 824 | 3 | 97.2931 | 0.0014 |
| 825 | 3 | 97.3347 | 0.0001 |
| 826 | 2 | 97.3924 | 0.0007 |
| 827 | 3 | 97.4036 | 0.0000 |
| 828 | 1 | 97.4069 | 0.0000 |
| 829 | 3 | 97.4127 | 0.0000 |
| 830 | 3 | 97.4302 | 0.0010 |
| 831 | 3 | 97.4509 | 0.0000 |
| 832 | 3 | 97.4524 | 0.0000 |
| 833 | 1 | 97.4655 | 0.0006 |
| 834 | 1 | 97.5002 | 0.0000 |
| 835 | 3 | 97.5005 | 0.0005 |
| 836 | 2 | 97.5056 | 0.0003 |
| 837 | 3 | 97.5302 | 0.0039 |
| 838 | 3 | 97.5345 | 0.0002 |
| 839 | 2 | 97.5348 | 0.0000 |
| 840 | 3 | 97.5433 | 0.0000 |
| 841 | 1 | 97.5446 | 0.0000 |
| 842 | 2 | 97.5594 | 0.0011 |
| 843 | 3 | 97.5695 | 0.0002 |
| 844 | 1 | 97.5762 | 0.0006 |
| 845 | 3 | 97.5957 | 0.0002 |
| 846 | 2 | 97.6255 | 0.0016 |
| 847 | 3 | 97.6272 | 0.0004 |
| 848 | 3 | 97.6373 | 0.0015 |
| 849 | 3 | 97.6575 | 0.0000 |
| 850 | 3 | 97.6750 | 0.0002 |
| 851 | 2 | 97.6937 | 0.0000 |
| 852 | 3 | 97.7056 | 0.0000 |
| 853 | 2 | 97.7058 | 0.0002 |
| 854 | 3 | 97.7571 | 0.0000 |
| 855 | 1 | 97.7591 | 0.0000 |
| 856 | 3 | 97.8216 | 0.0003 |
| 857 | 3 | 97.8512 | 0.0000 |
| 858 | 3 | 97.8734 | 0.0002 |
| 859 | 3 | 97.8975 | 0.0000 |
| 860 | 3 | 97.9290 | 0.0002 |
| 861 | 3 | 97.9441 | 0.0002 |
| 862 | 2 | 97.9488 | 0.0007 |
| 863 | 1 | 97.9798 | 0.0000 |
| 864 | 1 | 98.0329 | 0.0000 |
| 865 | 3 | 98.0459 | 0.0000 |
| 866 | 3 | 98.1512 | 0.0001 |
| 867 | 3 | 98.2058 | 0.0000 |
| 868 | 2 | 98.2176 | 0.0000 |
| 869 | 3 | 98.2833 | 0.0000 |
| 870 | 1 | 98.3091 | 0.0000 |
| 871 | 3 | 98.3390 | 0.0000 |
| 872 | 1 | 98.3998 | 0.0000 |
| 873 | 3 | 98.4053 | 0.0000 |
| 874 | 3 | 98.4292 | 0.0000 |
| 875 | 3 | 98.4480 | 0.0000 |
| 876 | 1 | 98.4583 | 0.0000 |
| 877 | 3 | 98.4700 | 0.0000 |
| 878 | 2 | 98.4963 | 0.0000 |
| 879 | 1 | 98.4984 | 0.0001 |
| 880 | 3 | 98.5316 | 0.0000 |
| 881 | 3 | 98.5381 | 0.0001 |
| 882 | 3 | 98.5823 | 0.0000 |
| 883 | 2 | 98.6127 | 0.0000 |

|     |   |          |        |
|-----|---|----------|--------|
| 884 | 3 | 98.6365  | 0.0000 |
| 885 | 1 | 98.6699  | 0.0000 |
| 886 | 2 | 98.6713  | 0.0001 |
| 887 | 3 | 98.6828  | 0.0000 |
| 888 | 3 | 98.7021  | 0.0000 |
| 889 | 3 | 98.7362  | 0.0000 |
| 890 | 3 | 98.7524  | 0.0000 |
| 891 | 2 | 98.7574  | 0.0000 |
| 892 | 1 | 98.8438  | 0.0000 |
| 893 | 3 | 98.8795  | 0.0000 |
| 894 | 3 | 98.9197  | 0.0000 |
| 895 | 2 | 98.9216  | 0.0000 |
| 896 | 3 | 99.0060  | 0.0000 |
| 897 | 1 | 99.0666  | 0.0000 |
| 898 | 5 | 99.0710  | 0.0000 |
| 899 | 3 | 99.0714  | 0.0000 |
| 900 | 3 | 99.1344  | 0.0000 |
| 901 | 3 | 99.1990  | 0.0000 |
| 902 | 3 | 99.2024  | 0.0000 |
| 903 | 1 | 99.2061  | 0.0000 |
| 904 | 3 | 99.2067  | 0.0000 |
| 905 | 2 | 99.2075  | 0.0000 |
| 906 | 1 | 99.2414  | 0.0000 |
| 907 | 3 | 99.2658  | 0.0000 |
| 908 | 1 | 99.2698  | 0.0000 |
| 909 | 3 | 99.3147  | 0.0000 |
| 910 | 3 | 99.3254  | 0.0000 |
| 911 | 3 | 99.3444  | 0.0000 |
| 912 | 2 | 99.3458  | 0.0000 |
| 913 | 3 | 99.3699  | 0.0002 |
| 914 | 3 | 99.4126  | 0.0000 |
| 915 | 1 | 99.4155  | 0.0001 |
| 916 | 3 | 99.4244  | 0.0000 |
| 917 | 2 | 99.4375  | 0.0000 |
| 918 | 1 | 99.4525  | 0.0000 |
| 919 | 3 | 99.5010  | 0.0000 |
| 920 | 3 | 99.5354  | 0.0000 |
| 921 | 3 | 99.5654  | 0.0002 |
| 922 | 1 | 99.5846  | 0.0000 |
| 923 | 2 | 99.5889  | 0.0000 |
| 924 | 1 | 99.6093  | 0.0000 |
| 925 | 3 | 99.6166  | 0.0001 |
| 926 | 3 | 99.6297  | 0.0000 |
| 927 | 3 | 99.6444  | 0.0000 |
| 928 | 3 | 99.6552  | 0.0000 |
| 929 | 2 | 99.6686  | 0.0000 |
| 930 | 3 | 99.6809  | 0.0000 |
| 931 | 2 | 99.6915  | 0.0000 |
| 932 | 3 | 99.7047  | 0.0000 |
| 933 | 3 | 99.7209  | 0.0000 |
| 934 | 1 | 99.7458  | 0.0000 |
| 935 | 3 | 99.7831  | 0.0000 |
| 936 | 3 | 99.7908  | 0.0000 |
| 937 | 2 | 99.7984  | 0.0000 |
| 938 | 3 | 99.8324  | 0.0000 |
| 939 | 3 | 99.8344  | 0.0000 |
| 940 | 2 | 99.8621  | 0.0000 |
| 941 | 2 | 99.8920  | 0.0001 |
| 942 | 3 | 99.8944  | 0.0001 |
| 943 | 3 | 99.9000  | 0.0000 |
| 944 | 1 | 99.9011  | 0.0000 |
| 945 | 3 | 99.9045  | 0.0000 |
| 946 | 1 | 99.9046  | 0.0000 |
| 947 | 1 | 99.9693  | 0.0000 |
| 948 | 3 | 99.9723  | 0.0000 |
| 949 | 3 | 99.9792  | 0.0000 |
| 950 | 2 | 99.9832  | 0.0000 |
| 951 | 1 | 100.0034 | 0.0000 |
| 952 | 3 | 100.0117 | 0.0000 |
| 953 | 1 | 100.0176 | 0.0000 |
| 954 | 3 | 100.0212 | 0.0000 |
| 955 | 3 | 100.0401 | 0.0000 |
| 956 | 1 | 100.0724 | 0.0000 |
| 957 | 1 | 100.0731 | 0.0000 |
| 958 | 3 | 100.0840 | 0.0000 |
| 959 | 3 | 100.0929 | 0.0000 |
| 960 | 3 | 100.1063 | 0.0001 |
| 961 | 2 | 100.1418 | 0.0000 |
| 962 | 2 | 100.1527 | 0.0000 |
| 963 | 3 | 100.1546 | 0.0000 |
| 964 | 3 | 100.1658 | 0.0000 |
| 965 | 3 | 100.1761 | 0.0001 |
| 966 | 2 | 100.1830 | 0.0000 |
| 967 | 3 | 100.1943 | 0.0000 |
| 968 | 1 | 100.2099 | 0.0000 |
| 969 | 1 | 100.2113 | 0.0000 |
| 970 | 3 | 100.2127 | 0.0000 |

|      |   |          |        |
|------|---|----------|--------|
| 971  | 3 | 100.2143 | 0.0000 |
| 972  | 3 | 100.2341 | 0.0000 |
| 973  | 2 | 100.2404 | 0.0000 |
| 974  | 3 | 100.2458 | 0.0000 |
| 975  | 3 | 100.2711 | 0.0000 |
| 976  | 1 | 100.2978 | 0.0000 |
| 977  | 3 | 100.2979 | 0.0000 |
| 978  | 2 | 100.2992 | 0.0000 |
| 979  | 3 | 100.3012 | 0.0000 |
| 980  | 3 | 100.3076 | 0.0000 |
| 981  | 3 | 100.3291 | 0.0001 |
| 982  | 2 | 100.3308 | 0.0000 |
| 983  | 3 | 100.3344 | 0.0000 |
| 984  | 3 | 100.3371 | 0.0000 |
| 985  | 3 | 100.3623 | 0.0000 |
| 986  | 1 | 100.3635 | 0.0000 |
| 987  | 3 | 100.3706 | 0.0000 |
| 988  | 3 | 100.3926 | 0.0000 |
| 989  | 1 | 100.3960 | 0.0000 |
| 990  | 1 | 100.3991 | 0.0000 |
| 991  | 3 | 100.4043 | 0.0001 |
| 992  | 2 | 100.4098 | 0.0002 |
| 993  | 3 | 100.4137 | 0.0000 |
| 994  | 2 | 100.4349 | 0.0001 |
| 995  | 3 | 100.4397 | 0.0000 |
| 996  | 2 | 100.4434 | 0.0001 |
| 997  | 3 | 100.4581 | 0.0000 |
| 998  | 3 | 100.4693 | 0.0000 |
| 999  | 3 | 100.4802 | 0.0000 |
| 1000 | 3 | 100.5091 | 0.0000 |
| 1001 | 3 | 100.5107 | 0.0000 |
| 1002 | 3 | 100.5215 | 0.0000 |
| 1003 | 1 | 100.5371 | 0.0000 |
| 1004 | 2 | 100.5405 | 0.0000 |
| 1005 | 3 | 100.5474 | 0.0000 |
| 1006 | 1 | 100.5506 | 0.0000 |
| 1007 | 3 | 100.5769 | 0.0000 |
| 1008 | 3 | 100.5867 | 0.0000 |
| 1009 | 3 | 100.6028 | 0.0002 |
| 1010 | 1 | 100.6170 | 0.0000 |
| 1011 | 2 | 100.6214 | 0.0000 |
| 1012 | 1 | 100.6220 | 0.0000 |
| 1013 | 2 | 100.6335 | 0.0000 |
| 1014 | 3 | 100.6459 | 0.0001 |
| 1015 | 1 | 100.6573 | 0.0000 |
| 1016 | 3 | 100.6583 | 0.0000 |
| 1017 | 3 | 100.6956 | 0.0000 |
| 1018 | 3 | 100.7038 | 0.0000 |
| 1019 | 3 | 100.7207 | 0.0000 |
| 1020 | 1 | 100.7308 | 0.0000 |
| 1021 | 3 | 100.7386 | 0.0000 |
| 1022 | 3 | 100.7478 | 0.0001 |
| 1023 | 2 | 100.7559 | 0.0000 |
| 1024 | 2 | 100.7721 | 0.0000 |
| 1025 | 1 | 100.7770 | 0.0000 |
| 1026 | 3 | 100.7842 | 0.0000 |
| 1027 | 3 | 100.7848 | 0.0000 |
| 1028 | 1 | 100.8082 | 0.0000 |
| 1029 | 3 | 100.8111 | 0.0000 |
| 1030 | 3 | 100.8155 | 0.0000 |
| 1031 | 1 | 100.8178 | 0.0000 |
| 1032 | 3 | 100.8381 | 0.0001 |
| 1033 | 2 | 100.8397 | 0.0000 |
| 1034 | 3 | 100.8432 | 0.0001 |
| 1035 | 3 | 100.8683 | 0.0001 |
| 1036 | 3 | 100.8689 | 0.0002 |
| 1037 | 1 | 100.8860 | 0.0000 |
| 1038 | 3 | 100.8920 | 0.0000 |
| 1039 | 3 | 100.9029 | 0.0000 |
| 1040 | 3 | 100.9192 | 0.0000 |
| 1041 | 1 | 100.9195 | 0.0003 |
| 1042 | 3 | 100.9293 | 0.0002 |
| 1043 | 2 | 100.9369 | 0.0005 |
| 1044 | 2 | 100.9412 | 0.0005 |
| 1045 | 1 | 100.9419 | 0.0000 |
| 1046 | 3 | 100.9457 | 0.0002 |
| 1047 | 2 | 100.9628 | 0.0000 |
| 1048 | 3 | 100.9658 | 0.0001 |
| 1049 | 3 | 100.9714 | 0.0000 |
| 1050 | 3 | 100.9866 | 0.0001 |
| 1051 | 1 | 100.9940 | 0.0000 |
| 1052 | 3 | 101.0049 | 0.0000 |
| 1053 | 2 | 101.0229 | 0.0000 |
| 1054 | 4 | 101.0409 | 0.0000 |
| 1055 | 3 | 101.0553 | 0.0001 |
| 1056 | 3 | 101.0560 | 0.0000 |
| 1057 | 2 | 101.0607 | 0.0001 |

|      |   |          |        |
|------|---|----------|--------|
| 1058 | 2 | 101.0746 | 0.0000 |
| 1059 | 3 | 101.0888 | 0.0004 |
| 1060 | 3 | 101.0891 | 0.0001 |
| 1061 | 3 | 101.0926 | 0.0001 |
| 1062 | 1 | 101.0988 | 0.0000 |
| 1063 | 3 | 101.1040 | 0.0002 |
| 1064 | 2 | 101.1165 | 0.0000 |
| 1065 | 1 | 101.1182 | 0.0000 |
| 1066 | 3 | 101.1259 | 0.0000 |
| 1067 | 2 | 101.1357 | 0.0000 |
| 1068 | 3 | 101.1433 | 0.0000 |
| 1069 | 2 | 101.1449 | 0.0000 |
| 1070 | 3 | 101.1480 | 0.0000 |
| 1071 | 3 | 101.1483 | 0.0000 |
| 1072 | 1 | 101.1546 | 0.0000 |
| 1073 | 1 | 101.1710 | 0.0000 |
| 1074 | 3 | 101.1761 | 0.0000 |
| 1075 | 3 | 101.1890 | 0.0000 |
| 1076 | 3 | 101.2062 | 0.0000 |
| 1077 | 2 | 101.2150 | 0.0000 |
| 1078 | 3 | 101.2206 | 0.0000 |
| 1079 | 3 | 101.2273 | 0.0000 |
| 1080 | 1 | 101.2333 | 0.0000 |
| 1081 | 3 | 101.2434 | 0.0000 |
| 1082 | 3 | 101.2468 | 0.0000 |
| 1083 | 3 | 101.2685 | 0.0000 |
| 1084 | 3 | 101.2869 | 0.0000 |
| 1085 | 3 | 101.3013 | 0.0000 |
| 1086 | 2 | 101.3094 | 0.0000 |
| 1087 | 3 | 101.3132 | 0.0000 |
| 1088 | 3 | 101.3275 | 0.0000 |
| 1089 | 3 | 101.3299 | 0.0000 |
| 1090 | 1 | 101.3343 | 0.0000 |
| 1091 | 2 | 101.3381 | 0.0000 |
| 1092 | 3 | 101.3537 | 0.0000 |
| 1093 | 1 | 101.3559 | 0.0000 |
| 1094 | 3 | 101.3694 | 0.0000 |
| 1095 | 3 | 101.3908 | 0.0000 |
| 1096 | 1 | 101.3990 | 0.0000 |
| 1097 | 2 | 101.4042 | 0.0000 |
| 1098 | 3 | 101.4251 | 0.0000 |
| 1099 | 1 | 101.4364 | 0.0000 |
| 1100 | 3 | 101.4427 | 0.0000 |
| 1101 | 2 | 101.4499 | 0.0000 |
| 1102 | 3 | 101.4534 | 0.0000 |
| 1103 | 3 | 101.4565 | 0.0000 |
| 1104 | 3 | 101.4633 | 0.0000 |
| 1105 | 2 | 101.4933 | 0.0000 |
| 1106 | 3 | 101.4947 | 0.0000 |
| 1107 | 2 | 101.5087 | 0.0000 |
| 1108 | 3 | 101.5108 | 0.0002 |
| 1109 | 1 | 101.5164 | 0.0000 |
| 1110 | 3 | 101.5297 | 0.0000 |
| 1111 | 2 | 101.5368 | 0.0000 |
| 1112 | 3 | 101.5424 | 0.0000 |
| 1113 | 3 | 101.5444 | 0.0001 |
| 1114 | 3 | 101.5465 | 0.0002 |
| 1115 | 3 | 101.5606 | 0.0000 |
| 1116 | 1 | 101.5616 | 0.0000 |
| 1117 | 3 | 101.5780 | 0.0001 |
| 1118 | 2 | 101.5851 | 0.0000 |
| 1119 | 2 | 101.6009 | 0.0000 |
| 1120 | 1 | 101.6043 | 0.0000 |
| 1121 | 3 | 101.6133 | 0.0000 |
| 1122 | 1 | 101.6252 | 0.0000 |
| 1123 | 3 | 101.6437 | 0.0000 |
| 1124 | 2 | 101.6471 | 0.0001 |
| 1125 | 3 | 101.6539 | 0.0000 |
| 1126 | 1 | 101.6657 | 0.0000 |
| 1127 | 3 | 101.6686 | 0.0000 |
| 1128 | 3 | 101.6707 | 0.0000 |
| 1129 | 2 | 101.6765 | 0.0000 |
| 1130 | 3 | 101.6925 | 0.0000 |
| 1131 | 3 | 101.7065 | 0.0000 |
| 1132 | 3 | 101.7071 | 0.0000 |
| 1133 | 2 | 101.7398 | 0.0000 |
| 1134 | 1 | 101.7440 | 0.0000 |
| 1135 | 3 | 101.7521 | 0.0002 |
| 1136 | 2 | 101.7526 | 0.0000 |
| 1137 | 3 | 101.7533 | 0.0000 |
| 1138 | 3 | 101.7654 | 0.0000 |
| 1139 | 3 | 101.7890 | 0.0002 |
| 1140 | 3 | 101.8039 | 0.0000 |
| 1141 | 1 | 101.8056 | 0.0000 |
| 1142 | 1 | 101.8234 | 0.0000 |
| 1143 | 2 | 101.8388 | 0.0000 |
| 1144 | 3 | 101.8439 | 0.0000 |

|      |   |          |        |
|------|---|----------|--------|
| 1145 | 1 | 101.8473 | 0.0000 |
| 1146 | 3 | 101.8496 | 0.0000 |
| 1147 | 3 | 101.8532 | 0.0002 |
| 1148 | 3 | 101.8823 | 0.0000 |
| 1149 | 2 | 101.8917 | 0.0003 |
| 1150 | 3 | 101.8985 | 0.0000 |
| 1151 | 3 | 101.9136 | 0.0001 |
| 1152 | 3 | 101.9188 | 0.0000 |
| 1153 | 1 | 101.9453 | 0.0000 |
| 1154 | 3 | 101.9557 | 0.0000 |
| 1155 | 2 | 101.9598 | 0.0000 |
| 1156 | 3 | 101.9609 | 0.0000 |
| 1157 | 3 | 101.9790 | 0.0001 |
| 1158 | 3 | 101.9890 | 0.0000 |
| 1159 | 1 | 102.0012 | 0.0000 |
| 1160 | 3 | 102.0018 | 0.0000 |
| 1161 | 3 | 102.0077 | 0.0000 |
| 1162 | 2 | 102.0318 | 0.0000 |
| 1163 | 4 | 102.0520 | 0.0000 |
| 1164 | 3 | 102.0577 | 0.0002 |
| 1165 | 3 | 102.0674 | 0.0000 |
| 1166 | 2 | 102.0678 | 0.0000 |
| 1167 | 3 | 102.0834 | 0.0001 |
| 1168 | 3 | 102.0957 | 0.0000 |
| 1169 | 1 | 102.0960 | 0.0000 |
| 1170 | 1 | 102.0984 | 0.0000 |
| 1171 | 3 | 102.1061 | 0.0000 |
| 1172 | 2 | 102.1098 | 0.0001 |
| 1173 | 3 | 102.1336 | 0.0000 |
| 1174 | 3 | 102.1383 | 0.0000 |
| 1175 | 3 | 102.1608 | 0.0000 |
| 1176 | 2 | 102.1647 | 0.0002 |
| 1177 | 3 | 102.1670 | 0.0000 |
| 1178 | 2 | 102.1694 | 0.0000 |
| 1179 | 1 | 102.2013 | 0.0000 |
| 1180 | 3 | 102.2032 | 0.0000 |
| 1181 | 3 | 102.2084 | 0.0000 |
| 1182 | 2 | 102.2163 | 0.0000 |
| 1183 | 3 | 102.2323 | 0.0000 |
| 1184 | 1 | 102.2328 | 0.0000 |
| 1185 | 1 | 102.2472 | 0.0000 |
| 1186 | 3 | 102.2498 | 0.0000 |
| 1187 | 3 | 102.2594 | 0.0000 |
| 1188 | 3 | 102.2668 | 0.0001 |
| 1189 | 1 | 102.2856 | 0.0000 |
| 1190 | 3 | 102.2903 | 0.0000 |
| 1191 | 1 | 102.2995 | 0.0000 |
| 1192 | 3 | 102.3000 | 0.0000 |
| 1193 | 2 | 102.3123 | 0.0004 |
| 1194 | 3 | 102.3133 | 0.0000 |
| 1195 | 2 | 102.3156 | 0.0000 |
| 1196 | 3 | 102.3504 | 0.0001 |
| 1197 | 3 | 102.3665 | 0.0000 |
| 1198 | 2 | 102.3928 | 0.0001 |
| 1199 | 3 | 102.3986 | 0.0003 |
| 1200 | 3 | 102.3998 | 0.0000 |
| 1201 | 3 | 102.4190 | 0.0003 |
| 1202 | 2 | 102.4348 | 0.0002 |
| 1203 | 1 | 102.4358 | 0.0000 |
| 1204 | 3 | 102.4612 | 0.0000 |
| 1205 | 3 | 102.4683 | 0.0001 |
| 1206 | 1 | 102.4786 | 0.0000 |
| 1207 | 3 | 102.4917 | 0.0004 |
| 1208 | 3 | 102.5014 | 0.0000 |
| 1209 | 2 | 102.5034 | 0.0004 |
| 1210 | 1 | 102.5041 | 0.0000 |
| 1211 | 3 | 102.5093 | 0.0000 |
| 1212 | 2 | 102.5268 | 0.0000 |
| 1213 | 3 | 102.5270 | 0.0000 |
| 1214 | 3 | 102.5583 | 0.0002 |
| 1215 | 3 | 102.5588 | 0.0000 |
| 1216 | 3 | 102.5857 | 0.0002 |
| 1217 | 1 | 102.5883 | 0.0000 |
| 1218 | 2 | 102.6238 | 0.0001 |
| 1219 | 3 | 102.6281 | 0.0000 |
| 1220 | 3 | 102.6469 | 0.0002 |
| 1221 | 3 | 102.6481 | 0.0000 |
| 1222 | 1 | 102.6591 | 0.0000 |
| 1223 | 1 | 102.6862 | 0.0000 |
| 1224 | 3 | 102.6913 | 0.0000 |
| 1225 | 2 | 102.6994 | 0.0004 |
| 1226 | 3 | 102.7093 | 0.0000 |
| 1227 | 1 | 102.7482 | 0.0000 |
| 1228 | 3 | 102.7679 | 0.0000 |
| 1229 | 3 | 102.7696 | 0.0000 |
| 1230 | 2 | 102.7751 | 0.0000 |
| 1231 | 3 | 102.7932 | 0.0000 |



|      |   |          |        |
|------|---|----------|--------|
| 1232 | 3 | 102.7968 | 0.0001 |
| 1233 | 3 | 102.8104 | 0.0000 |
| 1234 | 2 | 102.8568 | 0.0000 |
| 1235 | 4 | 102.8668 | 0.0001 |
| 1236 | 3 | 102.8879 | 0.0000 |
| 1237 | 2 | 102.8961 | 0.0010 |
| 1238 | 3 | 102.9237 | 0.0000 |
| 1239 | 3 | 102.9256 | 0.0005 |
| 1240 | 3 | 102.9486 | 0.0001 |
| 1241 | 3 | 102.9628 | 0.0018 |
| 1242 | 3 | 102.9649 | 0.0000 |
| 1243 | 1 | 102.9689 | 0.0000 |
| 1244 | 3 | 103.0045 | 0.0000 |
| 1245 | 2 | 103.0239 | 0.0008 |
| 1246 | 3 | 103.0251 | 0.0000 |
| 1247 | 2 | 103.0480 | 0.0001 |
| 1248 | 3 | 103.0661 | 0.0003 |
| 1249 | 3 | 103.0890 | 0.0000 |
| 1250 | 3 | 103.0975 | 0.0000 |
| 1251 | 1 | 103.1049 | 0.0000 |
| 1252 | 2 | 103.1073 | 0.0001 |
| 1253 | 3 | 103.1092 | 0.0001 |
| 1254 | 3 | 103.1387 | 0.0000 |
| 1255 | 3 | 103.1453 | 0.0000 |
| 1256 | 1 | 103.1651 | 0.0000 |
| 1257 | 2 | 103.1816 | 0.0001 |
| 1258 | 3 | 103.1832 | 0.0000 |
| 1259 | 3 | 103.1950 | 0.0000 |
| 1260 | 3 | 103.2196 | 0.0001 |
| 1261 | 2 | 103.2214 | 0.0001 |
| 1262 | 3 | 103.2346 | 0.0000 |
| 1263 | 1 | 103.2398 | 0.0000 |
| 1264 | 1 | 103.2623 | 0.0000 |
| 1265 | 3 | 103.2711 | 0.0001 |
| 1266 | 2 | 103.2717 | 0.0003 |
| 1267 | 1 | 103.2861 | 0.0000 |
| 1268 | 3 | 103.3349 | 0.0001 |
| 1269 | 1 | 103.3609 | 0.0000 |
| 1270 | 3 | 103.3771 | 0.0000 |
| 1271 | 2 | 103.3881 | 0.0007 |
| 1272 | 1 | 103.4035 | 0.0000 |
| 1273 | 3 | 103.4099 | 0.0004 |
| 1274 | 3 | 103.4240 | 0.0000 |
| 1275 | 1 | 103.4392 | 0.0000 |
| 1276 | 3 | 103.4433 | 0.0001 |
| 1277 | 2 | 103.4534 | 0.0000 |
| 1278 | 3 | 103.4896 | 0.0002 |
| 1279 | 2 | 103.4991 | 0.0000 |
| 1280 | 3 | 103.5065 | 0.0000 |
| 1281 | 3 | 103.5380 | 0.0000 |
| 1282 | 3 | 103.5520 | 0.0000 |
| 1283 | 3 | 103.5811 | 0.0000 |
| 1284 | 1 | 103.5894 | 0.0000 |
| 1285 | 3 | 103.5922 | 0.0000 |
| 1286 | 2 | 103.6135 | 0.0003 |
| 1287 | 3 | 103.6264 | 0.0000 |
| 1288 | 3 | 103.6339 | 0.0005 |
| 1289 | 3 | 103.6387 | 0.0000 |
| 1290 | 1 | 103.6414 | 0.0000 |
| 1291 | 2 | 103.6629 | 0.0000 |
| 1292 | 1 | 103.6649 | 0.0000 |
| 1293 | 3 | 103.6850 | 0.0005 |
| 1294 | 3 | 103.6912 | 0.0000 |
| 1295 | 3 | 103.7055 | 0.0000 |
| 1296 | 3 | 103.7067 | 0.0001 |
| 1297 | 2 | 103.7304 | 0.0005 |
| 1298 | 2 | 103.7530 | 0.0000 |
| 1299 | 3 | 103.7697 | 0.0000 |
| 1300 | 1 | 103.7714 | 0.0000 |
| 1301 | 3 | 103.7872 | 0.0001 |
| 1302 | 3 | 103.7928 | 0.0000 |
| 1303 | 3 | 103.8083 | 0.0010 |
| 1304 | 2 | 103.8349 | 0.0001 |
| 1305 | 1 | 103.8362 | 0.0001 |
| 1306 | 3 | 103.8451 | 0.0003 |
| 1307 | 1 | 103.8609 | 0.0000 |
| 1308 | 3 | 103.8626 | 0.0001 |
| 1309 | 3 | 103.9023 | 0.0000 |
| 1310 | 3 | 103.9291 | 0.0000 |
| 1311 | 3 | 103.9354 | 0.0000 |
| 1312 | 2 | 103.9423 | 0.0000 |
| 1313 | 3 | 103.9557 | 0.0000 |
| 1314 | 2 | 103.9712 | 0.0020 |
| 1315 | 3 | 103.9770 | 0.0000 |
| 1316 | 3 | 103.9989 | 0.0000 |
| 1317 | 1 | 104.0162 | 0.0000 |
| 1318 | 3 | 104.0464 | 0.0000 |

|      |   |          |        |
|------|---|----------|--------|
| 1319 | 3 | 104.0485 | 0.0007 |
| 1320 | 3 | 104.0583 | 0.0000 |
| 1321 | 2 | 104.1035 | 0.0001 |
| 1322 | 3 | 104.1103 | 0.0000 |
| 1323 | 3 | 104.1238 | 0.0007 |
| 1324 | 1 | 104.1369 | 0.0000 |
| 1325 | 3 | 104.1406 | 0.0000 |
| 1326 | 3 | 104.1436 | 0.0053 |
| 1327 | 2 | 104.1456 | 0.0016 |
| 1328 | 1 | 104.1543 | 0.0000 |
| 1329 | 3 | 104.1774 | 0.0000 |
| 1330 | 3 | 104.1812 | 0.0047 |
| 1331 | 1 | 104.1885 | 0.0000 |
| 1332 | 2 | 104.1900 | 0.0012 |
| 1333 | 3 | 104.2165 | 0.0000 |
| 1334 | 3 | 104.2184 | 0.0004 |
| 1335 | 3 | 104.2768 | 0.0000 |
| 1336 | 2 | 104.2905 | 0.0049 |
| 1337 | 3 | 104.2990 | 0.0116 |
| 1338 | 3 | 104.3109 | 0.0031 |
| 1339 | 3 | 104.3308 | 0.0000 |
| 1340 | 1 | 104.3712 | 0.0000 |
| 1341 | 2 | 104.3792 | 0.0366 |
| 1342 | 3 | 104.3844 | 0.0490 |
| 1343 | 3 | 104.4593 | 0.0000 |
| 1344 | 1 | 104.4676 | 0.0000 |
| 1345 | 3 | 104.4806 | 0.0030 |
| 1346 | 1 | 104.5026 | 0.0000 |
| 1347 | 3 | 104.5725 | 0.0001 |
| 1348 | 2 | 104.5845 | 0.0000 |
| 1349 | 3 | 104.5913 | 0.0091 |
| 1350 | 3 | 104.6272 | 0.0511 |
| 1351 | 3 | 104.6436 | 0.0000 |
| 1352 | 2 | 104.6484 | 0.0408 |
| 1353 | 1 | 104.6685 | 0.0000 |
| 1354 | 3 | 104.6807 | 0.0000 |
| 1355 | 3 | 104.7323 | 0.0042 |
| 1356 | 3 | 104.7336 | 0.0000 |
| 1357 | 2 | 104.7539 | 0.0012 |
| 1358 | 1 | 104.7628 | 0.0000 |
| 1359 | 3 | 104.7727 | 0.0008 |
| 1360 | 3 | 104.8354 | 0.0000 |
| 1361 | 3 | 104.8633 | 0.0009 |
| 1362 | 2 | 104.9154 | 0.0008 |
| 1363 | 3 | 104.9453 | 0.0000 |
| 1364 | 3 | 104.9845 | 0.0021 |
| 1365 | 3 | 105.0058 | 0.0000 |
| 1366 | 1 | 105.0351 | 0.0000 |
| 1367 | 2 | 105.0494 | 0.0028 |
| 1368 | 3 | 105.0927 | 0.0022 |
| 1369 | 2 | 105.2592 | 0.0003 |
| 1370 | 1 | 105.2791 | 0.0000 |
| 1371 | 3 | 105.2911 | 0.0007 |
| 1372 | 3 | 105.3731 | 0.0000 |
| 1373 | 1 | 105.4326 | 0.0000 |
| 1374 | 3 | 105.5033 | 0.0000 |
| 1375 | 3 | 105.5588 | 0.0000 |
| 1376 | 3 | 105.7489 | 0.0000 |
| 1377 | 1 | 105.7741 | 0.0000 |
| 1378 | 3 | 105.8767 | 0.0000 |
| 1379 | 2 | 105.9733 | 0.0000 |
| 1380 | 3 | 106.1359 | 0.0007 |
| 1381 | 2 | 106.1511 | 0.0005 |
| 1382 | 3 | 106.2127 | 0.0001 |
| 1383 | 3 | 106.2870 | 0.0000 |
| 1384 | 3 | 106.6377 | 0.0000 |
| 1385 | 3 | 106.7024 | 0.0000 |
| 1386 | 1 | 106.8850 | 0.0001 |
| 1387 | 2 | 106.8879 | 0.0000 |
| 1388 | 3 | 106.9245 | 0.0000 |
| 1389 | 1 | 106.9338 | 0.0000 |
| 1390 | 3 | 106.9591 | 0.0000 |
| 1391 | 3 | 106.9681 | 0.0000 |
| 1392 | 2 | 107.0841 | 0.0000 |
| 1393 | 3 | 107.0953 | 0.0000 |
| 1394 | 1 | 107.1067 | 0.0002 |
| 1395 | 2 | 107.1272 | 0.0000 |
| 1396 | 3 | 107.1911 | 0.0003 |
| 1397 | 3 | 107.2428 | 0.0000 |
| 1398 | 1 | 107.4113 | 0.0001 |
| 1399 | 1 | 107.4199 | 0.0000 |
| 1400 | 3 | 107.5190 | 0.0001 |
| 1401 | 3 | 107.5866 | 0.0005 |
| 1402 | 1 | 107.9291 | 0.0043 |
| 1403 | 3 | 107.9485 | 0.0013 |
| 1404 | 3 | 107.9493 | 0.0124 |
| 1405 | 3 | 107.9993 | 0.0001 |

|      |   |          |        |
|------|---|----------|--------|
| 1406 | 2 | 108.0341 | 0.0000 |
| 1407 | 3 | 108.0415 | 0.0000 |
| 1408 | 3 | 108.0481 | 0.0009 |
| 1409 | 3 | 108.1067 | 0.0094 |
| 1410 | 1 | 108.2025 | 0.0046 |
| 1411 | 3 | 108.3959 | 0.0011 |
| 1412 | 2 | 108.4513 | 0.0016 |
| 1413 | 3 | 108.5502 | 0.0021 |
| 1414 | 3 | 108.6792 | 0.0007 |
| 1415 | 3 | 108.8654 | 0.0007 |
| 1416 | 2 | 108.8716 | 0.0001 |
| 1417 | 3 | 108.9363 | 0.0001 |
| 1418 | 1 | 108.9796 | 0.0000 |
| 1419 | 3 | 109.1085 | 0.0007 |
| 1420 | 2 | 109.2349 | 0.0006 |
| 1421 | 3 | 109.6666 | 0.0003 |
| 1422 | 1 | 109.6749 | 0.0001 |
| 1423 | 3 | 109.6892 | 0.0004 |
| 1424 | 3 | 109.7224 | 0.0002 |
| 1425 | 2 | 109.7265 | 0.0000 |
| 1426 | 3 | 109.7651 | 0.0000 |
| 1427 | 3 | 109.7835 | 0.0022 |
| 1428 | 3 | 109.8345 | 0.0028 |
| 1429 | 1 | 109.8616 | 0.0010 |
| 1430 | 2 | 109.9909 | 0.0004 |
| 1431 | 3 | 110.0769 | 0.0001 |
| 1432 | 3 | 110.1381 | 0.0023 |
| 1433 | 1 | 110.5638 | 0.0000 |
| 1434 | 3 | 110.5750 | 0.0026 |
| 1435 | 3 | 110.6335 | 0.0000 |
| 1436 | 2 | 110.6526 | 0.0001 |
| 1437 | 3 | 110.7160 | 0.0000 |
| 1438 | 3 | 110.7870 | 0.0000 |
| 1439 | 3 | 111.1143 | 0.1088 |
| 1440 | 1 | 111.1996 | 0.0000 |
| 1441 | 2 | 111.2156 | 0.0208 |
| 1442 | 1 | 111.2297 | 0.0005 |
| 1443 | 3 | 111.2443 | 0.0132 |
| 1444 | 3 | 111.3133 | 0.0024 |
| 1445 | 3 | 111.3476 | 0.0018 |
| 1446 | 2 | 111.6076 | 0.0420 |
| 1447 | 3 | 111.6337 | 0.0544 |
| 1448 | 3 | 111.6598 | 0.0420 |
| 1449 | 1 | 111.7235 | 0.0000 |
| 1450 | 2 | 111.7824 | 0.0051 |
| 1451 | 3 | 111.8854 | 0.0631 |
| 1452 | 3 | 112.1252 | 0.0007 |
| 1453 | 3 | 112.1388 | 0.0020 |
| 1454 | 1 | 112.2441 | 0.0004 |
| 1455 | 3 | 112.2752 | 0.0036 |
| 1456 | 3 | 112.3524 | 0.0024 |
| 1457 | 2 | 112.3551 | 0.0014 |
| 1458 | 3 | 112.3663 | 0.0016 |
| 1459 | 1 | 112.3957 | 0.0000 |
| 1460 | 3 | 112.4091 | 0.0043 |
| 1461 | 2 | 112.4141 | 0.0000 |
| 1462 | 3 | 112.5126 | 0.0000 |
| 1463 | 3 | 112.6246 | 0.0017 |
| 1464 | 2 | 112.7681 | 0.0000 |
| 1465 | 1 | 112.8777 | 0.1090 |
| 1466 | 1 | 112.9170 | 0.0000 |
| 1467 | 3 | 112.9628 | 0.0011 |
| 1468 | 3 | 113.0028 | 0.0298 |
| 1469 | 3 | 113.1042 | 0.0495 |
| 1470 | 1 | 113.1385 | 0.0036 |
| 1471 | 3 | 113.1683 | 0.0001 |
| 1472 | 2 | 113.1879 | 0.0000 |
| 1473 | 3 | 113.2633 | 0.0181 |
| 1474 | 3 | 113.5009 | 0.0050 |
| 1475 | 2 | 113.5359 | 0.0000 |
| 1476 | 3 | 113.5935 | 0.0022 |
| 1477 | 1 | 113.7587 | 0.0000 |
| 1478 | 3 | 113.7687 | 0.0001 |
| 1479 | 3 | 113.8226 | 0.0000 |
| 1480 | 2 | 113.8672 | 0.0001 |
| 1481 | 3 | 113.9382 | 0.0000 |
| 1482 | 3 | 114.0030 | 0.0000 |
| 1483 | 1 | 114.2643 | 0.0014 |
| 1484 | 3 | 114.3454 | 0.0013 |
| 1485 | 3 | 114.3695 | 0.0000 |
| 1486 | 3 | 114.5694 | 0.0000 |
| 1487 | 3 | 114.5838 | 0.0001 |
| 1488 | 3 | 114.7270 | 0.0002 |
| 1489 | 3 | 114.7738 | 0.0000 |
| 1490 | 2 | 114.8320 | 0.0000 |
| 1491 | 3 | 114.8538 | 0.0000 |
| 1492 | 1 | 114.8872 | 0.0000 |

|      |   |          |        |
|------|---|----------|--------|
| 1493 | 2 | 114.9567 | 0.0000 |
| 1494 | 3 | 115.0139 | 0.0000 |
| 1495 | 2 | 115.0598 | 0.0001 |
| 1496 | 3 | 115.0804 | 0.0001 |
| 1497 | 1 | 115.0940 | 0.0000 |
| 1498 | 3 | 115.0956 | 0.0001 |
| 1499 | 1 | 115.2799 | 0.0000 |
| 1500 | 3 | 115.3152 | 0.0001 |
| 1501 | 3 | 115.3747 | 0.0000 |
| 1502 | 3 | 116.0688 | 0.0002 |
| 1503 | 3 | 116.6717 | 0.0001 |

---
